# Supplementary material for: High-throughput phenotyping using parallel sequencing of RNA interference targets in the African trypanosome
Source: HighWire-hosted journal article supplement (doi:10.1101/gr.115089.110), 2011-03-01
Supplement: File_S2._Gene_Ontology_profiles.xlsx [file File_S2._Gene_Ontology_profiles.xlsx]

## Sheet: 0-0-0-0
GO ID	GO Term	NB_IN_REF	FREQ_IN_REF	NB_IN_SET	FREQ_IN_SET	P-value	ENRICHMENT/DEPLETION	Ratio: F/D	Category
GO:0005840	ribosome	99	0.0426	62	0.2074	5.29821e-33	E	4.86854	C		0-0-0-0 profile: Significant loss-of-fitness in all experiments
GO:0003735	structural constituent of ribosome	99	0.0408	63	0.1994	1.02548e-33	E	4.88725
GO:0006412	translation	150	0.0634	76	0.2444	4.36898e-31	E	3.85489	P
GO:0030529	ribonucleoprotein complex	118	0.0508	66	0.2207	6.22726e-31	E	4.34449
GO:0005198	structural molecule activity	117	0.0482	65	0.2057	9.10023e-30	E	4.26763	F
GO:0034961	cellular biopolymer biosynthetic process	218	0.0922	91	0.2926	3.13565e-29	E	3.17354
GO:0043284	biopolymer biosynthetic process	219	0.0926	91	0.2926	4.81516e-29	E	3.15983			GO slim set
GO:0010467	gene expression	307	0.1298	108	0.3473	2.10108e-27	E	2.67565
GO:0034645	cellular macromolecule biosynthetic process	239	0.1011	91	0.2926	1.34951e-25	E	2.89416			Categories:
GO:0009059	macromolecule biosynthetic process	240	0.1015	91	0.2926	1.94877e-25	E	2.88276			P:Biological Process
GO:0032991	macromolecular complex	360	0.1549	111	0.3712	1.30642e-23	E	2.39638			C:Cellular Component
GO:0044424	intracellular part	700	0.3012	167	0.5585	1.44629e-23	E	1.85425			F:Molecular Function
GO:0005622	intracellular	710	0.3055	168	0.5619	2.64896e-23	E	1.83928	C
GO:0043232	intracellular non-membrane-bounded organelle	222	0.0955	82	0.2742	1.28974e-22	E	2.8712
GO:0043228	non-membrane-bounded organelle	222	0.0955	82	0.2742	1.28974e-22	E	2.8712
GO:0044249	cellular biosynthetic process	292	0.1235	95	0.3055	7.43726e-21	E	2.47368
GO:0009058	biosynthetic process	301	0.1273	95	0.3055	8.85654e-20	E	2.39984	P
GO:0005737	cytoplasm	419	0.1803	112	0.3746	3.8108e-18	E	2.07765	C
GO:0044444	cytoplasmic part	362	0.1558	100	0.3344	4.72513e-17	E	2.14634
GO:0043226	organelle	561	0.2414	129	0.4314	3.38996e-15	E	1.78708	C
GO:0043229	intracellular organelle	561	0.2414	129	0.4314	3.38996e-15	E	1.78708
GO:0044445	cytosolic part	38	0.0164	25	0.0836	2.28606e-14	E	5.09756
GO:0005829	cytosol	47	0.0202	28	0.0936	2.35015e-14	E	4.63366	C
GO:0044260	cellular macromolecule metabolic process	823	0.348	168	0.5402	4.11101e-14	E	1.5523
GO:0009987	cellular process	1293	0.5467	228	0.7331	2.25446e-13	E	1.34095
GO:0043170	macromolecule metabolic process	882	0.3729	174	0.5595	3.28624e-13	E	1.5004
GO:0033279	ribosomal subunit	33	0.0142	22	0.0736	6.02365e-13	E	5.1831
GO:0034960	cellular biopolymer metabolic process	800	0.3383	161	0.5177	1.13116e-12	E	1.5303
GO:0022626	cytosolic ribosome	27	0.0116	19	0.0635	5.66648e-12	E	5.47414
GO:0043283	biopolymer metabolic process	857	0.3624	167	0.537	6.56178e-12	E	1.48179
GO:0044267	cellular protein metabolic process	540	0.2283	119	0.3826	1.65354e-11	E	1.67587
GO:0005623	cell	998	0.4294	180	0.602	5.5365e-11	E	1.40196	C
GO:0044464	cell part	998	0.4294	180	0.602	5.5365e-11	E	1.40196
GO:0019538	protein metabolic process	596	0.252	125	0.4019	1.55043e-10	E	1.59484	P
GO:0044237	cellular metabolic process	1042	0.4406	185	0.5949	1.74159e-09	E	1.3502
GO:0044238	primary metabolic process	1049	0.4436	183	0.5884	1.33301e-08	E	1.32642	P
GO:0015935	small ribosomal subunit	15	0.0065	11	0.0368	1.08946e-07	E	5.66154
GO:0022627	cytosolic small ribosomal subunit	14	0.006	10	0.0334	6.38595e-07	E	5.56667
GO:0008152	metabolic process	1173	0.496	193	0.6206	6.78332e-07	E	1.25121	P
GO:0015934	large ribosomal subunit	18	0.0077	11	0.0368	1.70286e-06	E	4.77922
GO:0044422	organelle part	248	0.1067	56	0.1873	2.77942e-06	E	1.75539
GO:0022625	cytosolic large ribosomal subunit	13	0.0056	9	0.0301	3.63496e-06	E	5.375
GO:0003676	nucleic acid binding	232	0.0956	53	0.1677	5.54136e-06	E	1.75418	F
GO:0000502	proteasome complex	31	0.0133	14	0.0468	7.28899e-06	E	3.5188	C
GO:0044446	intracellular organelle part	240	0.1033	53	0.1773	1.02568e-05	E	1.71636
GO:0051726	regulation of cell cycle	15	0.0063	9	0.0289	2.33235e-05	E	4.5873
GO:0044265	cellular macromolecule catabolic process	65	0.0275	21	0.0675	2.95708e-05	E	2.45455
GO:0050789	regulation of biological process	80	0.0338	24	0.0772	3.15017e-05	E	2.28402	P
GO:0003723	RNA binding	124	0.0511	32	0.1013	3.68233e-05	E	1.98239	F
GO:0050794	regulation of cellular process	77	0.0326	23	0.074	4.90735e-05	E	2.26994
GO:0016779	nucleotidyltransferase activity	32	0.0132	13	0.0411	6.68329e-05	E	3.11364
GO:0000313	organellar ribosome	8	0.0034	6	0.0201	9.27359e-05	E	5.91176
GO:0005832	chaperonin-containing T-complex	8	0.0034	6	0.0201	9.27359e-05	E	5.91176
GO:0007017	microtubule-based process	38	0.0161	14	0.045	0.0001328	E	2.79503
GO:0007049	cell cycle	39	0.0165	14	0.045	0.0001807	E	2.72727	P
GO:0065007	biological regulation	104	0.044	26	0.0836	0.0003611	E	1.9
GO:0034962	cellular biopolymer catabolic process	42	0.0178	14	0.045	0.0004202	E	2.52809
GO:0019774	proteasome core complex, beta-subunit complex	7	0.003	5	0.0167	0.0005481	E	5.56667
GO:0044248	cellular catabolic process	88	0.0372	22	0.0707	0.0009549	E	1.90054
GO:0000314	organellar small ribosomal subunit	5	0.0022	4	0.0134	0.001175	E	6.09091
GO:0005838	proteasome regulatory particle	15	0.0065	7	0.0234	0.0011996	E	3.6
GO:0007018	microtubule-based movement	19	0.008	8	0.0257	0.00137	E	3.2125
GO:0044257	cellular protein catabolic process	38	0.0161	12	0.0386	0.0017186	E	2.39752
GO:0019941	modification-dependent protein catabolic process	38	0.0161	12	0.0386	0.0017186	E	2.39752
GO:0043632	modification-dependent macromolecule catabolic process	38	0.0161	12	0.0386	0.0017186	E	2.39752
GO:0051603	proteolysis involved in cellular protein catabolic process	38	0.0161	12	0.0386	0.0017186	E	2.39752
GO:0006511	ubiquitin-dependent protein catabolic process	38	0.0161	12	0.0386	0.0017186	E	2.39752	P
GO:0022624	proteasome accessory complex	16	0.0069	7	0.0234	0.0018629	E	3.3913
GO:0043234	protein complex	242	0.1041	45	0.1505	0.0019545	E	1.44573	C
GO:0019200	carbohydrate kinase activity	3	0.0012	3	0.0095	0.002189	E	7.91667
GO:0040008	regulation of growth	3	0.0013	3	0.0096	0.002255	E	7.38462
GO:0034062	RNA polymerase activity	17	0.007	7	0.0222	0.002961	E	3.17143
GO:0003899	DNA-directed RNA polymerase activity	17	0.007	7	0.0222	0.002961	E	3.17143
GO:0016070	RNA metabolic process	190	0.0803	37	0.119	0.0029869	E	1.48194
GO:0006350	transcription	36	0.0152	11	0.0354	0.003397	E	2.32895	P
GO:0003777	microtubule motor activity	22	0.0091	8	0.0253	0.0036103	E	2.78022
GO:0009057	macromolecule catabolic process	117	0.0495	25	0.0804	0.0039047	E	1.62424
GO:0005839	proteasome core complex	14	0.006	6	0.0201	0.0044135	E	3.35
GO:0030286	dynein complex	15	0.0065	6	0.0201	0.0064228	E	3.09231	C
GO:0020015	glycosome	20	0.0086	7	0.0234	0.0073457	E	2.72093	C
GO:0006066	cellular alcohol metabolic process	40	0.0169	11	0.0354	0.0075265	E	2.09467
GO:0006355	regulation of transcription, DNA-dependent	11	0.0047	5	0.0161	0.0076703	E	3.42553
GO:0016071	mRNA metabolic process	35	0.0148	10	0.0322	0.0080347	E	2.17568
GO:0006006	glucose metabolic process	25	0.0106	8	0.0257	0.0085428	E	2.42453
GO:0005996	monosaccharide metabolic process	31	0.0131	9	0.0289	0.0103226	E	2.20611
GO:0051252	regulation of RNA metabolic process	12	0.0051	5	0.0161	0.0114398	E	3.15686
GO:0010556	regulation of macromolecule biosynthetic process	17	0.0072	6	0.0193	0.0133331	E	2.68056
GO:0005854	nascent polypeptide-associated complex	2	0.0009	2	0.0067	0.0165045	E	7.44444
GO:0003700	transcription factor activity	5	0.0021	3	0.0095	0.0166012	E	4.52381	F
GO:0009056	catabolic process	141	0.0596	26	0.0836	0.0168813	E	1.40268	P
GO:0008143	poly(A) RNA binding	2	0.0008	2	0.0063	0.0169059	E	7.875
GO:0003727	single-stranded RNA binding	2	0.0008	2	0.0063	0.0169059	E	7.875
GO:0070717	poly-purine tract binding	2	0.0008	2	0.0063	0.0169059	E	7.875
GO:0043021	ribonucleoprotein binding	2	0.0008	2	0.0063	0.0169059	E	7.875
GO:0000339	RNA cap binding	2	0.0008	2	0.0063	0.0169059	E	7.875
GO:0008283	cell proliferation	5	0.0021	3	0.0096	0.0170511	E	4.57143	P
GO:0046164	alcohol catabolic process	23	0.0097	7	0.0225	0.0171355	E	2.31959
GO:0006007	glucose catabolic process	23	0.0097	7	0.0225	0.0171355	E	2.31959
GO:0044275	cellular carbohydrate catabolic process	23	0.0097	7	0.0225	0.0171355	E	2.31959
GO:0019320	hexose catabolic process	23	0.0097	7	0.0225	0.0171355	E	2.31959
GO:0046365	monosaccharide catabolic process	23	0.0097	7	0.0225	0.0171355	E	2.31959
GO:0019321	pentose metabolic process	2	0.0008	2	0.0064	0.0172442	E	8
GO:0042127	regulation of cell proliferation	2	0.0008	2	0.0064	0.0172442	E	8
GO:0010498	proteasomal protein catabolic process	2	0.0008	2	0.0064	0.0172442	E	8
GO:0001558	regulation of cell growth	2	0.0008	2	0.0064	0.0172442	E	8
GO:0043161	proteasomal ubiquitin-dependent protein catabolic process	2	0.0008	2	0.0064	0.0172442	E	8
GO:0033058	directional locomotion	2	0.0008	2	0.0064	0.0172442	E	8
GO:0048518	positive regulation of biological process	2	0.0008	2	0.0064	0.0172442	E	8
GO:0043056	forward locomotion	2	0.0008	2	0.0064	0.0172442	E	8
GO:0006396	RNA processing	117	0.0495	22	0.0707	0.0204829	E	1.42828
GO:0033036	macromolecule localization	35	0.0148	9	0.0289	0.0207622	E	1.9527
GO:0016052	carbohydrate catabolic process	24	0.0101	7	0.0225	0.0210512	E	2.22772
GO:0045449	regulation of transcription	14	0.0059	5	0.0161	0.0218838	E	2.72881
GO:0031326	regulation of cellular biosynthetic process	19	0.008	6	0.0193	0.0221281	E	2.4125
GO:0009889	regulation of biosynthetic process	19	0.008	6	0.0193	0.0221281	E	2.4125
GO:0019318	hexose metabolic process	30	0.0127	8	0.0257	0.0230948	E	2.02362
GO:0044262	cellular carbohydrate metabolic process	36	0.0152	9	0.0289	0.0240948	E	1.90132
GO:0044085	cellular component biogenesis	48	0.0203	11	0.0354	0.0243164	E	1.74384
GO:0045182	translation regulator activity	25	0.0103	7	0.0222	0.0243762	E	2.15534	F
GO:0008135	translation factor activity, nucleic acid binding	25	0.0103	7	0.0222	0.0243762	E	2.15534	F
GO:0043285	biopolymer catabolic process	94	0.0397	18	0.0579	0.026752	E	1.45844
GO:0006351	transcription, DNA-dependent	20	0.0085	6	0.0193	0.0275018	E	2.27059
GO:0010468	regulation of gene expression	20	0.0085	6	0.0193	0.0275018	E	2.27059
GO:0005813	centrosome	6	0.0026	3	0.01	0.0280346	E	3.84615
GO:0042254	ribosome biogenesis	26	0.011	7	0.0225	0.0302911	E	2.04545
GO:0004175	endopeptidase activity	57	0.0235	12	0.038	0.0308832	E	1.61702
GO:0006397	mRNA processing	21	0.0089	6	0.0193	0.0334948	E	2.16854
GO:0032774	RNA biosynthetic process	21	0.0089	6	0.0193	0.0334948	E	2.16854
GO:0006139	nucleobase, nucleoside, nucleotide and nucleic acid metabolic process	368	0.1556	55	0.1768	0.0352627	E	1.13625	P
GO:0022613	ribonucleoprotein complex biogenesis	27	0.0114	7	0.0225	0.0355781	E	1.97368
GO:0019219	regulation of nucleobase, nucleoside, nucleotide and nucleic acid metabolic process	16	0.0068	5	0.0161	0.0361239	E	2.36765
GO:0006413	translational initiation	16	0.0068	5	0.0161	0.0361239	E	2.36765
GO:0006096	glycolysis	16	0.0068	5	0.0161	0.0361239	E	2.36765
GO:0015031	protein transport	34	0.0144	8	0.0257	0.0410721	E	1.78472	P
GO:0045184	establishment of protein localization	34	0.0144	8	0.0257	0.0410721	E	1.78472
GO:0008104	protein localization	34	0.0144	8	0.0257	0.0410721	E	1.78472
GO:0019861	flagellum	17	0.0073	5	0.0167	0.0414656	E	2.28767
GO:0000315	organellar large ribosomal subunit	3	0.0013	2	0.0067	0.0431804	E	5.15385
GO:0034061	DNA polymerase activity	7	0.0029	3	0.0095	0.0440541	E	3.27586
GO:0003887	DNA-directed DNA polymerase activity	7	0.0029	3	0.0095	0.0440541	E	3.27586
GO:0005815	microtubule organizing center	12	0.0052	4	0.0134	0.0448177	E	2.57692	C
GO:0006094	gluconeogenesis	3	0.0013	2	0.0064	0.0449678	E	4.92308
GO:0005488	binding	825	0.3399	111	0.3513	0.0454598	E	1.03354	F
GO:0030528	transcription regulator activity	12	0.0049	4	0.0127	0.0463668	E	2.59184	F
GO:0060255	regulation of macromolecule metabolic process	23	0.0097	6	0.0193	0.0471466	E	1.98969
GO:0080090	regulation of primary metabolic process	23	0.0097	6	0.0193	0.0471466	E	1.98969
GO:0031323	regulation of cellular metabolic process	23	0.0097	6	0.0193	0.0471466	E	1.98969
GO:0006508	proteolysis	89	0.0376	16	0.0514	0.0473467	E	1.36702
GO:0008361	regulation of cell size	12	0.0051	4	0.0129	0.0476736	E	2.52941
GO:0019001	guanyl nucleotide binding	36	0.0148	8	0.0253	0.0498794	E	1.70946
GO:0005525	GTP binding	36	0.0148	8	0.0253	0.0498794	E	1.70946
GO:0032561	guanyl ribonucleotide binding	36	0.0148	8	0.0253	0.0498794	E	1.70946
GO:0030163	protein catabolic process	90	0.0381	16	0.0514	0.0501201	E	1.34908
GO:0015630	microtubule cytoskeleton	85	0.0366	15	0.0502	0.0508181	E	1.37158
GO:0042625	ATPase activity, coupled to transmembrane movement of ions	18	0.0074	5	0.0158	0.0519951	E	2.13514
GO:0005975	carbohydrate metabolic process	43	0.0182	9	0.0289	0.0545203	E	1.58791	P
GO:0005856	cytoskeleton	101	0.0435	17	0.0569	0.0546204	E	1.30805	C
GO:0043231	intracellular membrane-bounded organelle	360	0.1549	50	0.1672	0.0546452	E	1.07941
GO:0043227	membrane-bounded organelle	360	0.1549	50	0.1672	0.0546452	E	1.07941
GO:0005634	nucleus	140	0.0602	22	0.0736	0.0574789	E	1.22259	C
GO:0015662	ATPase activity, coupled to transmembrane movement of ions, phosphorylative mechanism	13	0.0054	4	0.0127	0.0583217	E	2.35185
GO:0031981	nuclear lumen	25	0.0108	6	0.0201	0.0583405	E	1.86111
GO:0040007	growth	13	0.0055	4	0.0129	0.0598774	E	2.34545	P
GO:0016829	lyase activity	19	0.0078	5	0.0158	0.0614549	E	2.02564
GO:0008233	peptidase activity	73	0.0301	13	0.0411	0.0616254	E	1.36545	F
GO:0019222	regulation of metabolic process	25	0.0106	6	0.0193	0.0625685	E	1.82075
GO:0019362	pyridine nucleotide metabolic process	8	0.0034	3	0.0096	0.0627557	E	2.82353
GO:0044428	nuclear part	46	0.0198	9	0.0301	0.064889	E	1.5202
GO:0044430	cytoskeletal part	90	0.0387	15	0.0502	0.0656336	E	1.29716
GO:0031090	organelle membrane	54	0.0232	10	0.0334	0.0692933	E	1.43966
GO:0005515	protein binding	130	0.0536	20	0.0633	0.0721064	E	1.18097	F
GO:0046860	glycosome membrane	4	0.0017	2	0.0067	0.0753098	E	3.94118
GO:0003729	mRNA binding	4	0.0016	2	0.0063	0.0768625	E	3.9375
GO:0051082	unfolded protein binding	55	0.0227	10	0.0316	0.0769588	E	1.39207
GO:0070011	peptidase activity, acting on L-amino acid peptides	70	0.0288	12	0.038	0.0776029	E	1.31944
GO:0032502	developmental process	4	0.0017	2	0.0064	0.0781701	E	3.76471
GO:0006354	RNA elongation	4	0.0017	2	0.0064	0.0781701	E	3.76471
GO:0006090	pyruvate metabolic process	4	0.0017	2	0.0064	0.0781701	E	3.76471
GO:0004198	calcium-dependent cysteine-type endopeptidase activity	9	0.0037	3	0.0095	0.0801436	E	2.56757
GO:0006766	vitamin metabolic process	9	0.0038	3	0.0096	0.0818326	E	2.52632
GO:0000226	microtubule cytoskeleton organization	9	0.0038	3	0.0096	0.0818326	E	2.52632
GO:0006767	water-soluble vitamin metabolic process	9	0.0038	3	0.0096	0.0818326	E	2.52632
GO:0017111	nucleoside-triphosphatase activity	212	0.0874	28	0.0886	0.0841986	E	1.01373
GO:0003743	translation initiation factor activity	15	0.0062	4	0.0127	0.0844152	E	2.04839
GO:0016875	ligase activity, forming carbon-oxygen bonds	15	0.0062	4	0.0127	0.0844152	E	2.04839
GO:0004812	aminoacyl-tRNA ligase activity	15	0.0062	4	0.0127	0.0844152	E	2.04839
GO:0016876	ligase activity, forming aminoacyl-tRNA and related compounds	15	0.0062	4	0.0127	0.0844152	E	2.04839
GO:0015992	proton transport	15	0.0063	4	0.0129	0.0864119	E	2.04762
GO:0006818	hydrogen transport	15	0.0063	4	0.0129	0.0864119	E	2.04762
GO:0051674	localization of cell	15	0.0063	4	0.0129	0.0864119	E	2.04762
GO:0006928	cell motion	15	0.0063	4	0.0129	0.0864119	E	2.04762
GO:0006457	protein folding	97	0.041	15	0.0482	0.0909675	E	1.17561
GO:0043233	organelle lumen	30	0.0129	6	0.0201	0.0988683	E	1.55814
GO:0031974	membrane-enclosed lumen	30	0.0129	6	0.0201	0.0988683	E	1.55814
GO:0070013	intracellular organelle lumen	30	0.0129	6	0.0201	0.0988683	E	1.55814
GO:0000375	RNA splicing, via transesterification reactions	16	0.0068	4	0.0129	0.100164	E	1.89706
GO:0000377	RNA splicing, via transesterification reactions with bulged adenosine as nucleophile	16	0.0068	4	0.0129	0.100164	E	1.89706
GO:0000398	nuclear mRNA splicing, via spliceosome	16	0.0068	4	0.0129	0.100164	E	1.89706
GO:0010926	anatomical structure formation	23	0.0097	5	0.0161	0.104616	E	1.65979
GO:0022607	cellular component assembly	23	0.0097	5	0.0161	0.104616	E	1.65979
GO:0015075	ion transmembrane transporter activity	38	0.0157	7	0.0222	0.106322	E	1.41401
GO:0016887	ATPase activity	109	0.0449	15	0.0475	0.109944	E	1.05791
GO:0017070	U6 snRNA binding	5	0.0021	2	0.0063	0.111503	E	3
GO:0022890	inorganic cation transmembrane transporter activity	17	0.007	4	0.0127	0.111564	E	1.81429
GO:0019319	hexose biosynthetic process	5	0.0021	2	0.0064	0.113232	E	3.04762
GO:0046165	alcohol biosynthetic process	5	0.0021	2	0.0064	0.113232	E	3.04762
GO:0046364	monosaccharide biosynthetic process	5	0.0021	2	0.0064	0.113232	E	3.04762
GO:0015672	monovalent inorganic cation transport	17	0.0072	4	0.0129	0.113865	E	1.79167
GO:0016043	cellular component organization	102	0.0431	14	0.045	0.114964	E	1.04408	P
GO:0012506	vesicle membrane	11	0.0047	3	0.01	0.116738	E	2.12766
GO:0012505	endomembrane system	25	0.0108	5	0.0167	0.119419	E	1.5463
GO:0042995	cell projection	25	0.0108	5	0.0167	0.119419	E	1.5463
GO:0006811	ion transport	32	0.0135	6	0.0193	0.120285	E	1.42963	P
GO:0016049	cell growth	11	0.0047	3	0.0096	0.121454	E	2.04255	P
GO:0042623	ATPase activity, coupled	86	0.0354	12	0.038	0.1215	E	1.07345
GO:0051649	establishment of localization in cell	58	0.0245	9	0.0289	0.126483	E	1.17959
GO:0051641	cellular localization	58	0.0245	9	0.0289	0.126483	E	1.17959
GO:0005875	microtubule associated complex	69	0.0297	10	0.0334	0.126821	E	1.12458
GO:0006418	tRNA aminoacylation for protein translation	18	0.0076	4	0.0129	0.127257	E	1.69737
GO:0007242	intracellular signaling cascade	33	0.014	6	0.0193	0.127796	E	1.37857
GO:0003774	motor activity	69	0.0284	10	0.0316	0.128651	E	1.11268	F
GO:0005777	peroxisome	1	0.0004	1	0.0033	0.128658	E	8.25	C
GO:0019908	nuclear cyclin-dependent protein kinase holoenzyme complex	1	0.0004	1	0.0033	0.128658	E	8.25
GO:0005652	nuclear lamina	1	0.0004	1	0.0033	0.128658	E	8.25
GO:0009328	phenylalanine-tRNA ligase complex	1	0.0004	1	0.0033	0.128658	E	8.25
GO:0005637	nuclear inner membrane	1	0.0004	1	0.0033	0.128658	E	8.25
GO:0030123	AP-3 adaptor complex	1	0.0004	1	0.0033	0.128658	E	8.25
GO:0016282	eukaryotic 43S preinitiation complex	1	0.0004	1	0.0033	0.128658	E	8.25
GO:0030867	rough endoplasmic reticulum membrane	1	0.0004	1	0.0033	0.128658	E	8.25
GO:0005791	rough endoplasmic reticulum	1	0.0004	1	0.0033	0.128658	E	8.25
GO:0042579	microbody	1	0.0004	1	0.0033	0.128658	E	8.25
GO:0005785	signal recognition particle receptor complex	1	0.0004	1	0.0033	0.128658	E	8.25
GO:0034399	nuclear periphery	1	0.0004	1	0.0033	0.128658	E	8.25
GO:0046907	intracellular transport	50	0.0211	8	0.0257	0.129853	E	1.21801
GO:0008079	translation termination factor activity	1	0.0004	1	0.0032	0.130202	E	8
GO:0050265	RNA uridylyltransferase activity	1	0.0004	1	0.0032	0.130202	E	8
GO:0004616	phosphogluconate dehydrogenase (decarboxylating) activity	1	0.0004	1	0.0032	0.130202	E	8
GO:0004396	hexokinase activity	1	0.0004	1	0.0032	0.130202	E	8
GO:0008124	4-alpha-hydroxytetrahydrobiopterin dehydratase activity	1	0.0004	1	0.0032	0.130202	E	8
GO:0004611	phosphoenolpyruvate carboxykinase activity	1	0.0004	1	0.0032	0.130202	E	8
GO:0070569	uridylyltransferase activity	1	0.0004	1	0.0032	0.130202	E	8
GO:0005053	peroxisome matrix targeting signal-2 binding	1	0.0004	1	0.0032	0.130202	E	8
GO:0005047	signal recognition particle binding	1	0.0004	1	0.0032	0.130202	E	8
GO:0005048	signal sequence binding	1	0.0004	1	0.0032	0.130202	E	8
GO:0008192	RNA guanylyltransferase activity	1	0.0004	1	0.0032	0.130202	E	8
GO:0046537	2,3-bisphosphoglycerate-independent phosphoglycerate mutase activity	1	0.0004	1	0.0032	0.130202	E	8
GO:0015450	P-P-bond-hydrolysis-driven protein transmembrane transporter activity	1	0.0004	1	0.0032	0.130202	E	8
GO:0008097	5S rRNA binding	1	0.0004	1	0.0032	0.130202	E	8
GO:0016840	carbon-nitrogen lyase activity	1	0.0004	1	0.0032	0.130202	E	8
GO:0004018	N6-(1,2-dicarboxyethyl)AMP AMP-lyase (fumarate-forming) activity	1	0.0004	1	0.0032	0.130202	E	8
GO:0003713	transcription coactivator activity	1	0.0004	1	0.0032	0.130202	E	8
GO:0008443	phosphofructokinase activity	1	0.0004	1	0.0032	0.130202	E	8
GO:0005516	calmodulin binding	1	0.0004	1	0.0032	0.130202	E	8
GO:0004332	fructose-bisphosphate aldolase activity	1	0.0004	1	0.0032	0.130202	E	8
GO:0004814	arginine-tRNA ligase activity	1	0.0004	1	0.0032	0.130202	E	8
GO:0004103	choline kinase activity	1	0.0004	1	0.0032	0.130202	E	8
GO:0004747	ribokinase activity	1	0.0004	1	0.0032	0.130202	E	8
GO:0070566	adenylyltransferase activity	1	0.0004	1	0.0032	0.130202	E	8
GO:0016563	transcription activator activity	1	0.0004	1	0.0032	0.130202	E	8
GO:0003872	6-phosphofructokinase activity	1	0.0004	1	0.0032	0.130202	E	8
GO:0004743	pyruvate kinase activity	1	0.0004	1	0.0032	0.130202	E	8
GO:0004612	phosphoenolpyruvate carboxykinase (ATP) activity	1	0.0004	1	0.0032	0.130202	E	8
GO:0042277	peptide binding	1	0.0004	1	0.0032	0.130202	E	8
GO:0043024	ribosomal small subunit binding	1	0.0004	1	0.0032	0.130202	E	8
GO:0004652	polynucleotide adenylyltransferase activity	1	0.0004	1	0.0032	0.130202	E	8
GO:0004367	glycerol-3-phosphate dehydrogenase (NAD+) activity	1	0.0004	1	0.0032	0.130202	E	8
GO:0004484	mRNA guanylyltransferase activity	1	0.0004	1	0.0032	0.130202	E	8
GO:0004751	ribose-5-phosphate isomerase activity	1	0.0004	1	0.0032	0.130202	E	8
GO:0004619	phosphoglycerate mutase activity	1	0.0004	1	0.0032	0.130202	E	8
GO:0016842	amidine-lyase activity	1	0.0004	1	0.0032	0.130202	E	8
GO:0022884	macromolecule transmembrane transporter activity	1	0.0004	1	0.0032	0.130202	E	8
GO:0004516	nicotinate phosphoribosyltransferase activity	1	0.0004	1	0.0032	0.130202	E	8
GO:0003747	translation release factor activity	1	0.0004	1	0.0032	0.130202	E	8
GO:0000268	peroxisome targeting sequence binding	1	0.0004	1	0.0032	0.130202	E	8
GO:0004822	isoleucine-tRNA ligase activity	1	0.0004	1	0.0032	0.130202	E	8
GO:0016868	intramolecular transferase activity, phosphotransferases	1	0.0004	1	0.0032	0.130202	E	8
GO:0004828	serine-tRNA ligase activity	1	0.0004	1	0.0032	0.130202	E	8
GO:0007275	multicellular organismal development	1	0.0004	1	0.0032	0.131501	E	8	P
GO:0045893	positive regulation of transcription, DNA-dependent	1	0.0004	1	0.0032	0.131501	E	8
GO:0031328	positive regulation of cellular biosynthetic process	1	0.0004	1	0.0032	0.131501	E	8
GO:0031325	positive regulation of cellular metabolic process	1	0.0004	1	0.0032	0.131501	E	8
GO:0048522	positive regulation of cellular process	1	0.0004	1	0.0032	0.131501	E	8
GO:0006646	phosphatidylethanolamine biosynthetic process	1	0.0004	1	0.0032	0.131501	E	8
GO:0045798	negative regulation of chromatin assembly or disassembly	1	0.0004	1	0.0032	0.131501	E	8
GO:0007163	establishment or maintenance of cell polarity	1	0.0004	1	0.0032	0.131501	E	8
GO:0006308	DNA catabolic process	1	0.0004	1	0.0032	0.131501	E	8
GO:0006900	membrane budding	1	0.0004	1	0.0032	0.131501	E	8
GO:0031935	regulation of chromatin silencing	1	0.0004	1	0.0032	0.131501	E	8
GO:0040010	positive regulation of growth rate	1	0.0004	1	0.0032	0.131501	E	8
GO:0006434	seryl-tRNA aminoacylation	1	0.0004	1	0.0032	0.131501	E	8
GO:0006014	D-ribose metabolic process	1	0.0004	1	0.0032	0.131501	E	8
GO:0000291	nuclear-transcribed mRNA catabolic process, exonucleolytic	1	0.0004	1	0.0032	0.131501	E	8
GO:0009052	pentose-phosphate shunt, non-oxidative branch	1	0.0004	1	0.0032	0.131501	E	8
GO:0019932	second-messenger-mediated signaling	1	0.0004	1	0.0032	0.131501	E	8
GO:0045941	positive regulation of transcription	1	0.0004	1	0.0032	0.131501	E	8
GO:0001672	regulation of chromatin assembly or disassembly	1	0.0004	1	0.0032	0.131501	E	8
GO:0045927	positive regulation of growth	1	0.0004	1	0.0032	0.131501	E	8
GO:0051325	interphase	1	0.0004	1	0.0032	0.131501	E	8
GO:0031936	negative regulation of chromatin silencing	1	0.0004	1	0.0032	0.131501	E	8
GO:0006144	purine base metabolic process	1	0.0004	1	0.0032	0.131501	E	8
GO:0010628	positive regulation of gene expression	1	0.0004	1	0.0032	0.131501	E	8
GO:0010557	positive regulation of macromolecule biosynthetic process	1	0.0004	1	0.0032	0.131501	E	8
GO:0031452	negative regulation of heterochromatin formation	1	0.0004	1	0.0032	0.131501	E	8
GO:0046146	tetrahydrobiopterin metabolic process	1	0.0004	1	0.0032	0.131501	E	8
GO:0016050	vesicle organization	1	0.0004	1	0.0032	0.131501	E	8
GO:0006428	isoleucyl-tRNA aminoacylation	1	0.0004	1	0.0032	0.131501	E	8
GO:0006420	arginyl-tRNA aminoacylation	1	0.0004	1	0.0032	0.131501	E	8
GO:0030031	cell projection assembly	1	0.0004	1	0.0032	0.131501	E	8
GO:0042559	pteridine and derivative biosynthetic process	1	0.0004	1	0.0032	0.131501	E	8
GO:0033044	regulation of chromosome organization	1	0.0004	1	0.0032	0.131501	E	8
GO:0009893	positive regulation of metabolic process	1	0.0004	1	0.0032	0.131501	E	8
GO:0000086	G2/M transition of mitotic cell cycle	1	0.0004	1	0.0032	0.131501	E	8
GO:0043173	nucleotide salvage	1	0.0004	1	0.0032	0.131501	E	8
GO:0009891	positive regulation of biosynthetic process	1	0.0004	1	0.0032	0.131501	E	8
GO:0050657	nucleic acid transport	1	0.0004	1	0.0032	0.131501	E	8
GO:0050658	RNA transport	1	0.0004	1	0.0032	0.131501	E	8
GO:0045815	positive regulation of gene expression, epigenetic	1	0.0004	1	0.0032	0.131501	E	8
GO:0019365	pyridine nucleotide salvage	1	0.0004	1	0.0032	0.131501	E	8
GO:0051030	snRNA transport	1	0.0004	1	0.0032	0.131501	E	8
GO:0006345	loss of chromatin silencing	1	0.0004	1	0.0032	0.131501	E	8
GO:0019722	calcium-mediated signaling	1	0.0004	1	0.0032	0.131501	E	8
GO:0000956	nuclear-transcribed mRNA catabolic process	1	0.0004	1	0.0032	0.131501	E	8
GO:0010847	regulation of chromatin assembly	1	0.0004	1	0.0032	0.131501	E	8
GO:0046337	phosphatidylethanolamine metabolic process	1	0.0004	1	0.0032	0.131501	E	8
GO:0009452	RNA capping	1	0.0004	1	0.0032	0.131501	E	8
GO:0051329	interphase of mitotic cell cycle	1	0.0004	1	0.0032	0.131501	E	8
GO:0006403	RNA localization	1	0.0004	1	0.0032	0.131501	E	8
GO:0045935	positive regulation of nucleobase, nucleoside, nucleotide and nucleic acid metabolic process	1	0.0004	1	0.0032	0.131501	E	8
GO:0051254	positive regulation of RNA metabolic process	1	0.0004	1	0.0032	0.131501	E	8
GO:0007265	Ras protein signal transduction	1	0.0004	1	0.0032	0.131501	E	8
GO:0006370	mRNA capping	1	0.0004	1	0.0032	0.131501	E	8
GO:0006729	tetrahydrobiopterin biosynthetic process	1	0.0004	1	0.0032	0.131501	E	8
GO:0006405	RNA export from nucleus	1	0.0004	1	0.0032	0.131501	E	8
GO:0046497	nicotinate nucleotide metabolic process	1	0.0004	1	0.0032	0.131501	E	8
GO:0030010	establishment of cell polarity	1	0.0004	1	0.0032	0.131501	E	8
GO:0031507	heterochromatin formation	1	0.0004	1	0.0032	0.131501	E	8
GO:0051236	establishment of RNA localization	1	0.0004	1	0.0032	0.131501	E	8
GO:0010604	positive regulation of macromolecule metabolic process	1	0.0004	1	0.0032	0.131501	E	8
GO:0006402	mRNA catabolic process	1	0.0004	1	0.0032	0.131501	E	8
GO:0019358	nicotinate nucleotide salvage	1	0.0004	1	0.0032	0.131501	E	8
GO:0019438	aromatic compound biosynthetic process	1	0.0004	1	0.0032	0.131501	E	8
GO:0006408	snRNA export from nucleus	1	0.0004	1	0.0032	0.131501	E	8
GO:0040009	regulation of growth rate	1	0.0004	1	0.0032	0.131501	E	8
GO:0009296	flagellum assembly	1	0.0004	1	0.0032	0.131501	E	8
GO:0031445	regulation of heterochromatin formation	1	0.0004	1	0.0032	0.131501	E	8
GO:0006091	generation of precursor metabolites and energy	42	0.0178	7	0.0225	0.132874	E	1.26404	P
GO:0007264	small GTPase mediated signal transduction	26	0.011	5	0.0161	0.134341	E	1.46364
GO:0006886	intracellular protein transport	26	0.011	5	0.0161	0.134341	E	1.46364
GO:0034613	cellular protein localization	26	0.011	5	0.0161	0.134341	E	1.46364
GO:0070727	cellular macromolecule localization	26	0.011	5	0.0161	0.134341	E	1.46364
GO:0008380	RNA splicing	26	0.011	5	0.0161	0.134341	E	1.46364
GO:0005730	nucleolus	12	0.0052	3	0.01	0.135732	E	1.92308	C
GO:0031988	membrane-bounded vesicle	12	0.0052	3	0.01	0.135732	E	1.92308
GO:0031982	vesicle	12	0.0052	3	0.01	0.135732	E	1.92308
GO:0043039	tRNA aminoacylation	19	0.008	4	0.0129	0.140107	E	1.6125
GO:0043038	amino acid activation	19	0.008	4	0.0129	0.140107	E	1.6125
GO:0003677	DNA binding	66	0.0272	9	0.0285	0.14219	E	1.04779	F
GO:0008287	protein serine/threonine phosphatase complex	6	0.0026	2	0.0067	0.143146	E	2.57692
GO:0005874	microtubule	6	0.0026	2	0.0067	0.143146	E	2.57692
GO:0016836	hydro-lyase activity	6	0.0025	2	0.0063	0.145571	E	2.52
GO:0006812	cation transport	28	0.0118	5	0.0161	0.151624	E	1.36441
GO:0015399	primary active transmembrane transporter activity	38	0.0157	6	0.019	0.156053	E	1.21019
GO:0015405	P-P-bond-hydrolysis-driven transmembrane transporter activity	38	0.0157	6	0.019	0.156053	E	1.21019
GO:0006733	oxidoreduction coenzyme metabolic process	13	0.0055	3	0.0096	0.159025	E	1.74545
GO:0007165	signal transduction	40	0.0169	6	0.0193	0.165798	E	1.14201	P
GO:0007154	cell communication	41	0.0173	6	0.0193	0.168742	E	1.11561	P
GO:0008026	ATP-dependent helicase activity	44	0.0181	6	0.019	0.173151	E	1.04972
GO:0070035	purine NTP-dependent helicase activity	44	0.0181	6	0.019	0.173151	E	1.04972
GO:0015077	monovalent inorganic cation transmembrane transporter activity	14	0.0058	3	0.0095	0.173541	E	1.63793
GO:0015078	hydrogen ion transmembrane transporter activity	14	0.0058	3	0.0095	0.173541	E	1.63793
GO:0019829	cation-transporting ATPase activity	7	0.0029	2	0.0063	0.177367	E	2.17241
GO:0016835	carbon-oxygen lyase activity	7	0.0029	2	0.0063	0.177367	E	2.17241
GO:0017069	snRNA binding	7	0.0029	2	0.0063	0.177367	E	2.17241
GO:0003746	translation elongation factor activity	7	0.0029	2	0.0063	0.177367	E	2.17241
GO:0031497	chromatin assembly	7	0.003	2	0.0064	0.179585	E	2.13333
GO:0006769	nicotinamide metabolic process	7	0.003	2	0.0064	0.179585	E	2.13333
GO:0006098	pentose-phosphate shunt	7	0.003	2	0.0064	0.179585	E	2.13333
GO:0006740	NADPH regeneration	7	0.003	2	0.0064	0.179585	E	2.13333
GO:0034637	cellular carbohydrate biosynthetic process	7	0.003	2	0.0064	0.179585	E	2.13333
GO:0006739	NADP metabolic process	7	0.003	2	0.0064	0.179585	E	2.13333
GO:0007010	cytoskeleton organization	23	0.0097	4	0.0129	0.182581	E	1.3299	P
GO:0005509	calcium ion binding	35	0.0144	5	0.0158	0.186333	E	1.09722	F
GO:0042626	ATPase activity, coupled to transmembrane movement of substances	36	0.0148	5	0.0158	0.188253	E	1.06757
GO:0043492	ATPase activity, coupled to movement of substances	36	0.0148	5	0.0158	0.188253	E	1.06757
GO:0016820	hydrolase activity, acting on acid anhydrides, catalyzing transmembrane movement of substances	37	0.0152	5	0.0158	0.189355	E	1.03947
GO:0034622	cellular macromolecular complex assembly	15	0.0063	3	0.0096	0.19106	E	1.52381
GO:0030120	vesicle coat	8	0.0034	2	0.0067	0.203107	E	1.97059
GO:0008324	cation transmembrane transporter activity	27	0.0111	4	0.0127	0.205068	E	1.14414
GO:0065008	regulation of biological quality	27	0.0114	4	0.0129	0.206198	E	1.13158
GO:0006399	tRNA metabolic process	27	0.0114	4	0.0129	0.206198	E	1.13158
GO:0016051	carbohydrate biosynthetic process	8	0.0034	2	0.0064	0.208068	E	1.88235
GO:0006333	chromatin assembly or disassembly	8	0.0034	2	0.0064	0.208068	E	1.88235
GO:0006260	DNA replication	30	0.0127	4	0.0129	0.211033	E	1.01575
GO:0016044	membrane organization	17	0.0072	3	0.0096	0.215584	E	1.33333
GO:0005768	endosome	2	0.0009	1	0.0033	0.224306	E	3.66667	C
GO:0016607	nuclear speck	2	0.0009	1	0.0033	0.224306	E	3.66667
GO:0046540	U4/U6 x U5 tri-snRNP complex	2	0.0009	1	0.0033	0.224306	E	3.66667
GO:0009331	glycerol-3-phosphate dehydrogenase complex	2	0.0009	1	0.0033	0.224306	E	3.66667
GO:0030137	COPI-coated vesicle	2	0.0009	1	0.0033	0.224306	E	3.66667
GO:0016604	nuclear body	2	0.0009	1	0.0033	0.224306	E	3.66667
GO:0030126	COPI vesicle coat	2	0.0009	1	0.0033	0.224306	E	3.66667
GO:0030663	COPI coated vesicle membrane	2	0.0009	1	0.0033	0.224306	E	3.66667
GO:0031965	nuclear membrane	2	0.0009	1	0.0033	0.224306	E	3.66667
GO:0000307	cyclin-dependent protein kinase holoenzyme complex	2	0.0009	1	0.0033	0.224306	E	3.66667
GO:0005847	mRNA cleavage and polyadenylation specificity factor complex	2	0.0009	1	0.0033	0.224306	E	3.66667
GO:0005849	mRNA cleavage factor complex	2	0.0009	1	0.0033	0.224306	E	3.66667
GO:0034621	cellular macromolecular complex subunit organization	18	0.0076	3	0.0096	0.224765	E	1.26316
GO:0006325	establishment or maintenance of chromatin architecture	18	0.0076	3	0.0096	0.224765	E	1.26316
GO:0008134	transcription factor binding	2	0.0008	1	0.0032	0.226592	E	4
GO:0004129	cytochrome-c oxidase activity	2	0.0008	1	0.0032	0.226592	E	4
GO:0016675	oxidoreductase activity, acting on heme group of donors	2	0.0008	1	0.0032	0.226592	E	4
GO:0004634	phosphopyruvate hydratase activity	2	0.0008	1	0.0032	0.226592	E	4
GO:0016832	aldehyde-lyase activity	2	0.0008	1	0.0032	0.226592	E	4
GO:0070568	guanylyltransferase activity	2	0.0008	1	0.0032	0.226592	E	4
GO:0004468	lysine N-acetyltransferase activity	2	0.0008	1	0.0032	0.226592	E	4
GO:0016866	intramolecular transferase activity	2	0.0008	1	0.0032	0.226592	E	4
GO:0035004	phosphoinositide 3-kinase activity	2	0.0008	1	0.0032	0.226592	E	4
GO:0004826	phenylalanine-tRNA ligase activity	2	0.0008	1	0.0032	0.226592	E	4
GO:0016219	GDP-dissociation stimulator activity	2	0.0008	1	0.0032	0.226592	E	4
GO:0003712	transcription cofactor activity	2	0.0008	1	0.0032	0.226592	E	4
GO:0015085	calcium ion transmembrane transporter activity	2	0.0008	1	0.0032	0.226592	E	4
GO:0016303	1-phosphatidylinositol-3-kinase activity	2	0.0008	1	0.0032	0.226592	E	4
GO:0042054	histone methyltransferase activity	2	0.0008	1	0.0032	0.226592	E	4
GO:0015002	heme-copper terminal oxidase activity	2	0.0008	1	0.0032	0.226592	E	4
GO:0016676	oxidoreductase activity, acting on heme group of donors, oxygen as acceptor	2	0.0008	1	0.0032	0.226592	E	4
GO:0004402	histone acetyltransferase activity	2	0.0008	1	0.0032	0.226592	E	4
GO:0005388	calcium-transporting ATPase activity	2	0.0008	1	0.0032	0.226592	E	4
GO:0009434	microtubule-based flagellum	9	0.0039	2	0.0067	0.22765	E	1.71795
GO:0009653	anatomical structure morphogenesis	2	0.0008	1	0.0032	0.228514	E	4	P
GO:0009607	response to biotic stimulus	2	0.0008	1	0.0032	0.228514	E	4	P
GO:0046335	ethanolamine biosynthetic process	2	0.0008	1	0.0032	0.228514	E	4
GO:0042255	ribosome assembly	2	0.0008	1	0.0032	0.228514	E	4
GO:0051789	response to protein stimulus	2	0.0008	1	0.0032	0.228514	E	4
GO:0032501	multicellular organismal process	2	0.0008	1	0.0032	0.228514	E	4
GO:0010639	negative regulation of organelle organization	2	0.0008	1	0.0032	0.228514	E	4
GO:0016573	histone acetylation	2	0.0008	1	0.0032	0.228514	E	4
GO:0006890	retrograde vesicle-mediated transport, Golgi to ER	2	0.0008	1	0.0032	0.228514	E	4
GO:0006986	response to unfolded protein	2	0.0008	1	0.0032	0.228514	E	4
GO:0051253	negative regulation of RNA metabolic process	2	0.0008	1	0.0032	0.228514	E	4
GO:0008535	respiratory chain complex IV assembly	2	0.0008	1	0.0032	0.228514	E	4
GO:0042558	pteridine and derivative metabolic process	2	0.0008	1	0.0032	0.228514	E	4
GO:0051129	negative regulation of cellular component organization	2	0.0008	1	0.0032	0.228514	E	4
GO:0006379	mRNA cleavage	2	0.0008	1	0.0032	0.228514	E	4
GO:0006378	mRNA polyadenylation	2	0.0008	1	0.0032	0.228514	E	4
GO:0044087	regulation of cellular component biogenesis	2	0.0008	1	0.0032	0.228514	E	4
GO:0032989	cellular component morphogenesis	2	0.0008	1	0.0032	0.228514	E	4
GO:0000902	cell morphogenesis	2	0.0008	1	0.0032	0.228514	E	4
GO:0045814	negative regulation of gene expression, epigenetic	2	0.0008	1	0.0032	0.228514	E	4
GO:0043631	RNA polyadenylation	2	0.0008	1	0.0032	0.228514	E	4
GO:0045892	negative regulation of transcription, DNA-dependent	2	0.0008	1	0.0032	0.228514	E	4
GO:0006914	autophagy	2	0.0008	1	0.0032	0.228514	E	4
GO:0051168	nuclear export	2	0.0008	1	0.0032	0.228514	E	4
GO:0006342	chromatin silencing	2	0.0008	1	0.0032	0.228514	E	4
GO:0006613	cotranslational protein targeting to membrane	2	0.0008	1	0.0032	0.228514	E	4
GO:0048856	anatomical structure development	2	0.0008	1	0.0032	0.228514	E	4
GO:0006446	regulation of translational initiation	2	0.0008	1	0.0032	0.228514	E	4
GO:0042026	protein refolding	2	0.0008	1	0.0032	0.228514	E	4
GO:0006580	ethanolamine metabolic process	2	0.0008	1	0.0032	0.228514	E	4
GO:0006432	phenylalanyl-tRNA aminoacylation	2	0.0008	1	0.0032	0.228514	E	4
GO:0008092	cytoskeletal protein binding	9	0.0037	2	0.0063	0.230258	E	1.7027	F
GO:0016830	carbon-carbon lyase activity	9	0.0037	2	0.0063	0.230258	E	1.7027
GO:0008565	protein transporter activity	9	0.0037	2	0.0063	0.230258	E	1.7027
GO:0006323	DNA packaging	9	0.0038	2	0.0064	0.232445	E	1.68421
GO:0065003	macromolecular complex assembly	20	0.0085	3	0.0096	0.236987	E	1.12941
GO:0019866	organelle inner membrane	21	0.009	3	0.01	0.238583	E	1.11111
GO:0008234	cysteine-type peptidase activity	21	0.0087	3	0.0095	0.239454	E	1.09195
GO:0004197	cysteine-type endopeptidase activity	21	0.0087	3	0.0095	0.239454	E	1.09195
GO:0031975	envelope	23	0.0099	3	0.01	0.241259	E	1.0101
GO:0031967	organelle envelope	23	0.0099	3	0.01	0.241259	E	1.0101
GO:0003924	GTPase activity	23	0.0095	3	0.0095	0.241273	E	1
GO:0004722	protein serine/threonine phosphatase activity	23	0.0095	3	0.0095	0.241273	E	1
GO:0030135	coated vesicle	10	0.0043	2	0.0067	0.248055	E	1.55814
GO:0048475	coated membrane	10	0.0043	2	0.0067	0.248055	E	1.55814
GO:0030117	membrane coat	10	0.0043	2	0.0067	0.248055	E	1.55814
GO:0030659	cytoplasmic vesicle membrane	10	0.0043	2	0.0067	0.248055	E	1.55814
GO:0030662	coated vesicle membrane	10	0.0043	2	0.0067	0.248055	E	1.55814
GO:0044433	cytoplasmic vesicle part	10	0.0043	2	0.0067	0.248055	E	1.55814
GO:0016410	N-acyltransferase activity	10	0.0041	2	0.0063	0.250446	E	1.53659
GO:0008080	N-acetyltransferase activity	10	0.0041	2	0.0063	0.250446	E	1.53659
GO:0040011	locomotion	10	0.0042	2	0.0064	0.252449	E	1.52381
GO:0016023	cytoplasmic membrane-bounded vesicle	11	0.0047	2	0.0067	0.264265	E	1.42553	C
GO:0031410	cytoplasmic vesicle	11	0.0047	2	0.0067	0.264265	E	1.42553
GO:0016469	proton-transporting two-sector ATPase complex	11	0.0047	2	0.0067	0.264265	E	1.42553
GO:0006605	protein targeting	11	0.0047	2	0.0064	0.268064	E	1.3617
GO:0016568	chromatin modification	11	0.0047	2	0.0064	0.268064	E	1.3617
GO:0005654	nucleoplasm	12	0.0052	2	0.0067	0.276399	E	1.28846	C
GO:0044451	nucleoplasm part	12	0.0052	2	0.0067	0.276399	E	1.28846
GO:0005200	structural constituent of cytoskeleton	12	0.0049	2	0.0063	0.278063	E	1.28571
GO:0006725	cellular aromatic compound metabolic process	13	0.0055	2	0.0064	0.286891	E	1.16364
GO:0016616	oxidoreductase activity, acting on the CH-OH group of donors, NAD or NADP as acceptor	14	0.0058	2	0.0063	0.290156	E	1.08621
GO:0016407	acetyltransferase activity	15	0.0062	2	0.0063	0.291229	E	1.01613
GO:0005635	nuclear envelope	3	0.0013	1	0.0033	0.293279	E	2.53846	C
GO:0044450	microtubule organizing center part	3	0.0013	1	0.0033	0.293279	E	2.53846
GO:0005819	spindle	3	0.0013	1	0.0033	0.293279	E	2.53846
GO:0008352	katanin complex	3	0.0013	1	0.0033	0.293279	E	2.53846
GO:0045259	proton-transporting ATP synthase complex	3	0.0013	1	0.0033	0.293279	E	2.53846
GO:0000922	spindle pole	3	0.0013	1	0.0033	0.293279	E	2.53846
GO:0005753	mitochondrial proton-transporting ATP synthase complex	3	0.0013	1	0.0033	0.293279	E	2.53846
GO:0005852	eukaryotic translation initiation factor 3 complex	3	0.0013	1	0.0033	0.293279	E	2.53846
GO:0043235	receptor complex	3	0.0013	1	0.0033	0.293279	E	2.53846
GO:0030119	AP-type membrane coat adaptor complex	3	0.0013	1	0.0033	0.293279	E	2.53846
GO:0003682	chromatin binding	3	0.0012	1	0.0032	0.295738	E	2.66667	F
GO:0015082	di-, tri-valent inorganic cation transmembrane transporter activity	3	0.0012	1	0.0032	0.295738	E	2.66667
GO:0030515	snoRNA binding	3	0.0012	1	0.0032	0.295738	E	2.66667
GO:0008641	small protein activating enzyme activity	3	0.0012	1	0.0032	0.295738	E	2.66667
GO:0008320	protein transmembrane transporter activity	3	0.0012	1	0.0032	0.295738	E	2.66667
GO:0005507	copper ion binding	3	0.0012	1	0.0032	0.295738	E	2.66667
GO:0004839	ubiquitin activating enzyme activity	3	0.0012	1	0.0032	0.295738	E	2.66667
GO:0019843	rRNA binding	3	0.0012	1	0.0032	0.295738	E	2.66667
GO:0040029	regulation of gene expression, epigenetic	3	0.0013	1	0.0032	0.297803	E	2.46154	P
GO:0022618	ribonucleoprotein complex assembly	3	0.0013	1	0.0032	0.297803	E	2.46154
GO:0000910	cytokinesis	3	0.0013	1	0.0032	0.297803	E	2.46154
GO:0051301	cell division	3	0.0013	1	0.0032	0.297803	E	2.46154
GO:0006473	protein amino acid acetylation	3	0.0013	1	0.0032	0.297803	E	2.46154
GO:0006417	regulation of translation	3	0.0013	1	0.0032	0.297803	E	2.46154
GO:0006401	RNA catabolic process	3	0.0013	1	0.0032	0.297803	E	2.46154
GO:0042439	ethanolamine and derivative metabolic process	3	0.0013	1	0.0032	0.297803	E	2.46154
GO:0043064	flagellum organization	3	0.0013	1	0.0032	0.297803	E	2.46154
GO:0043543	protein amino acid acylation	3	0.0013	1	0.0032	0.297803	E	2.46154
GO:0030030	cell projection organization	3	0.0013	1	0.0032	0.297803	E	2.46154
GO:0007034	vacuolar transport	3	0.0013	1	0.0032	0.297803	E	2.46154
GO:0006612	protein targeting to membrane	3	0.0013	1	0.0032	0.297803	E	2.46154
GO:0048869	cellular developmental process	3	0.0013	1	0.0032	0.297803	E	2.46154
GO:0006072	glycerol-3-phosphate metabolic process	3	0.0013	1	0.0032	0.297803	E	2.46154
GO:0006623	protein targeting to vacuole	3	0.0013	1	0.0032	0.297803	E	2.46154
GO:0020016	flagellar pocket	4	0.0017	1	0.0033	0.340832	E	1.94118
GO:0044455	mitochondrial membrane part	4	0.0017	1	0.0033	0.340832	E	1.94118
GO:0005681	spliceosome	4	0.0017	1	0.0033	0.340832	E	1.94118
GO:0015631	tubulin binding	4	0.0016	1	0.0032	0.343075	E	2
GO:0033558	protein deacetylase activity	4	0.0016	1	0.0032	0.343075	E	2
GO:0004407	histone deacetylase activity	4	0.0016	1	0.0032	0.343075	E	2
GO:0004112	cyclic-nucleotide phosphodiesterase activity	4	0.0016	1	0.0032	0.343075	E	2
GO:0008276	protein methyltransferase activity	4	0.0016	1	0.0032	0.343075	E	2
GO:0001727	lipid kinase activity	4	0.0016	1	0.0032	0.343075	E	2
GO:0008017	microtubule binding	4	0.0016	1	0.0032	0.343075	E	2
GO:0033043	regulation of organelle organization	4	0.0017	1	0.0032	0.344957	E	1.88235
GO:0016458	gene silencing	4	0.0017	1	0.0032	0.344957	E	1.88235
GO:0006071	glycerol metabolic process	4	0.0017	1	0.0032	0.344957	E	1.88235
GO:0009306	protein secretion	4	0.0017	1	0.0032	0.344957	E	1.88235
GO:0006913	nucleocytoplasmic transport	4	0.0017	1	0.0032	0.344957	E	1.88235
GO:0051128	regulation of cellular component organization	4	0.0017	1	0.0032	0.344957	E	1.88235
GO:0016471	vacuolar proton-transporting V-type ATPase complex	5	0.0022	1	0.0033	0.371316	E	1.5
GO:0030125	clathrin vesicle coat	5	0.0022	1	0.0033	0.371316	E	1.5
GO:0033176	proton-transporting V-type ATPase complex	5	0.0022	1	0.0033	0.371316	E	1.5
GO:0030665	clathrin coated vesicle membrane	5	0.0022	1	0.0033	0.371316	E	1.5
GO:0030136	clathrin-coated vesicle	5	0.0022	1	0.0033	0.371316	E	1.5
GO:0030532	small nuclear ribonucleoprotein complex	5	0.0022	1	0.0033	0.371316	E	1.5
GO:0003779	actin binding	5	0.0021	1	0.0032	0.373093	E	1.52381	F
GO:0009055	electron carrier activity	5	0.0021	1	0.0032	0.373093	E	1.52381	F
GO:0008553	hydrogen-exporting ATPase activity, phosphorylative mechanism	5	0.0021	1	0.0032	0.373093	E	1.52381
GO:0019213	deacetylase activity	5	0.0021	1	0.0032	0.373093	E	1.52381
GO:0051087	chaperone binding	5	0.0021	1	0.0032	0.373093	E	1.52381
GO:0016861	intramolecular oxidoreductase activity, interconverting aldoses and ketoses	5	0.0021	1	0.0032	0.373093	E	1.52381
GO:0046961	proton-transporting ATPase activity, rotational mechanism	5	0.0021	1	0.0032	0.373093	E	1.52381
GO:0016831	carboxy-lyase activity	5	0.0021	1	0.0032	0.373093	E	1.52381
GO:0004428	inositol or phosphatidylinositol kinase activity	5	0.0021	1	0.0032	0.373093	E	1.52381
GO:0009112	nucleobase metabolic process	5	0.0021	1	0.0032	0.37458	E	1.52381
GO:0016481	negative regulation of transcription	5	0.0021	1	0.0032	0.37458	E	1.52381
GO:0015991	ATP hydrolysis coupled proton transport	5	0.0021	1	0.0032	0.37458	E	1.52381
GO:0019751	polyol metabolic process	5	0.0021	1	0.0032	0.37458	E	1.52381
GO:0010558	negative regulation of macromolecule biosynthetic process	5	0.0021	1	0.0032	0.37458	E	1.52381
GO:0015988	energy coupled proton transport, against electrochemical gradient	5	0.0021	1	0.0032	0.37458	E	1.52381
GO:0006338	chromatin remodeling	5	0.0021	1	0.0032	0.37458	E	1.52381
GO:0051169	nuclear transport	5	0.0021	1	0.0032	0.37458	E	1.52381
GO:0010608	posttranscriptional regulation of gene expression	5	0.0021	1	0.0032	0.37458	E	1.52381
GO:0015931	nucleobase, nucleoside, nucleotide and nucleic acid transport	5	0.0021	1	0.0032	0.37458	E	1.52381
GO:0045934	negative regulation of nucleobase, nucleoside, nucleotide and nucleic acid metabolic process	5	0.0021	1	0.0032	0.37458	E	1.52381
GO:0009890	negative regulation of biosynthetic process	5	0.0021	1	0.0032	0.37458	E	1.52381
GO:0031327	negative regulation of cellular biosynthetic process	5	0.0021	1	0.0032	0.37458	E	1.52381
GO:0044442	microtubule-based flagellum part	6	0.0026	1	0.0033	0.38832	E	1.26923
GO:0005732	small nucleolar ribonucleoprotein complex	6	0.0026	1	0.0033	0.38832	E	1.26923
GO:0000178	exosome (RNase complex)	6	0.0026	1	0.0033	0.38832	E	1.26923
GO:0044460	flagellum part	6	0.0026	1	0.0033	0.38832	E	1.26923
GO:0005216	ion channel activity	6	0.0025	1	0.0032	0.389483	E	1.28	F
GO:0005484	SNAP receptor activity	6	0.0025	1	0.0032	0.389483	E	1.28
GO:0016811	hydrolase activity, acting on carbon-nitrogen (but not peptide) bonds, in linear amides	6	0.0025	1	0.0032	0.389483	E	1.28
GO:0005083	small GTPase regulator activity	6	0.0025	1	0.0032	0.389483	E	1.28
GO:0008186	RNA-dependent ATPase activity	6	0.0025	1	0.0032	0.389483	E	1.28
GO:0004004	ATP-dependent RNA helicase activity	6	0.0025	1	0.0032	0.389483	E	1.28
GO:0003724	RNA helicase activity	6	0.0025	1	0.0032	0.389483	E	1.28
GO:0051246	regulation of protein metabolic process	6	0.0025	1	0.0032	0.390452	E	1.28
GO:0016569	covalent chromatin modification	6	0.0025	1	0.0032	0.390452	E	1.28
GO:0034728	nucleosome organization	6	0.0025	1	0.0032	0.390452	E	1.28
GO:0042398	cellular amino acid derivative biosynthetic process	6	0.0025	1	0.0032	0.390452	E	1.28
GO:0032268	regulation of cellular protein metabolic process	6	0.0025	1	0.0032	0.390452	E	1.28
GO:0045291	nuclear mRNA trans splicing, SL addition	6	0.0025	1	0.0032	0.390452	E	1.28
GO:0031324	negative regulation of cellular metabolic process	6	0.0025	1	0.0032	0.390452	E	1.28
GO:0065004	protein-DNA complex assembly	6	0.0025	1	0.0032	0.390452	E	1.28
GO:0016570	histone modification	6	0.0025	1	0.0032	0.390452	E	1.28
GO:0000365	nuclear mRNA trans splicing, via spliceosome	6	0.0025	1	0.0032	0.390452	E	1.28
GO:0042401	biogenic amine biosynthetic process	6	0.0025	1	0.0032	0.390452	E	1.28
GO:0046903	secretion	6	0.0025	1	0.0032	0.390452	E	1.28
GO:0006944	membrane fusion	6	0.0025	1	0.0032	0.390452	E	1.28
GO:0032940	secretion by cell	6	0.0025	1	0.0032	0.390452	E	1.28
GO:0048523	negative regulation of cellular process	6	0.0025	1	0.0032	0.390452	E	1.28
GO:0043623	cellular protein complex assembly	6	0.0025	1	0.0032	0.390452	E	1.28
GO:0006334	nucleosome assembly	6	0.0025	1	0.0032	0.390452	E	1.28
GO:0044432	endoplasmic reticulum part	7	0.003	1	0.0033	0.394798	E	1.1
GO:0005798	Golgi-associated vesicle	7	0.003	1	0.0033	0.394798	E	1.1
GO:0030118	clathrin coat	7	0.003	1	0.0033	0.394798	E	1.1
GO:0030660	Golgi-associated vesicle membrane	7	0.003	1	0.0033	0.394798	E	1.1
GO:0005789	endoplasmic reticulum membrane	7	0.003	1	0.0033	0.394798	E	1.1
GO:0030695	GTPase regulator activity	7	0.0029	1	0.0032	0.395274	E	1.10345
GO:0060589	nucleoside-triphosphatase regulator activity	7	0.0029	1	0.0032	0.395274	E	1.10345
GO:0046873	metal ion transmembrane transporter activity	7	0.0029	1	0.0032	0.395274	E	1.10345
GO:0016860	intramolecular oxidoreductase activity	7	0.0029	1	0.0032	0.395274	E	1.10345
GO:0010629	negative regulation of gene expression	7	0.003	1	0.0032	0.395666	E	1.06667
GO:0016556	mRNA modification	7	0.003	1	0.0032	0.395666	E	1.06667
GO:0016197	endosome transport	7	0.003	1	0.0032	0.395666	E	1.06667
GO:0005774	vacuolar membrane	8	0.0034	1	0.0033	0.393167	D	0.970588
GO:0044437	vacuolar part	8	0.0034	1	0.0033	0.393167	D	0.970588
GO:0042175	nuclear envelope-endoplasmic reticulum network	8	0.0034	1	0.0033	0.393167	D	0.970588
GO:0022803	passive transmembrane transporter activity	8	0.0033	1	0.0032	0.392941	D	0.969697
GO:0015037	peptide disulfide oxidoreductase activity	8	0.0033	1	0.0032	0.392941	D	0.969697
GO:0015267	channel activity	8	0.0033	1	0.0032	0.392941	D	0.969697
GO:0016763	transferase activity, transferring pentosyl groups	8	0.0033	1	0.0032	0.392941	D	0.969697
GO:0015038	glutathione disulfide oxidoreductase activity	8	0.0033	1	0.0032	0.392941	D	0.969697
GO:0022838	substrate specific channel activity	8	0.0033	1	0.0032	0.392941	D	0.969697
GO:0004362	glutathione-disulfide reductase activity	8	0.0033	1	0.0032	0.392941	D	0.969697
GO:0006414	translational elongation	8	0.0034	1	0.0032	0.392741	D	0.941176
GO:0000278	mitotic cell cycle	8	0.0034	1	0.0032	0.392741	D	0.941176
GO:0009892	negative regulation of metabolic process	8	0.0034	1	0.0032	0.392741	D	0.941176
GO:0010605	negative regulation of macromolecule metabolic process	8	0.0034	1	0.0032	0.392741	D	0.941176
GO:0048519	negative regulation of biological process	8	0.0034	1	0.0032	0.392741	D	0.941176
GO:0022403	cell cycle phase	8	0.0034	1	0.0032	0.392741	D	0.941176
GO:0005773	vacuole	9	0.0039	1	0.0033	0.3854	D	0.846154	C
GO:0000139	Golgi membrane	9	0.0039	1	0.0033	0.3854	D	0.846154
GO:0016209	antioxidant activity	9	0.0037	1	0.0032	0.384494	D	0.864865	F
GO:0004540	ribonuclease activity	9	0.0037	1	0.0032	0.384494	D	0.864865
GO:0008081	phosphoric diester hydrolase activity	9	0.0037	1	0.0032	0.384494	D	0.864865
GO:0046483	heterocycle metabolic process	9	0.0038	1	0.0032	0.383723	D	0.842105
GO:0010324	membrane invagination	9	0.0038	1	0.0032	0.383723	D	0.842105
GO:0022402	cell cycle process	9	0.0038	1	0.0032	0.383723	D	0.842105
GO:0006897	endocytosis	9	0.0038	1	0.0032	0.383723	D	0.842105
GO:0031202	RNA splicing factor activity, transesterification mechanism	10	0.0041	1	0.0032	0.371561	D	0.780488
GO:0048193	Golgi vesicle transport	10	0.0042	1	0.0032	0.370259	D	0.761905
GO:0005783	endoplasmic reticulum	11	0.0047	1	0.0033	0.357556	D	0.702128	C
GO:0070271	protein complex biogenesis	11	0.0047	1	0.0032	0.353672	D	0.680851
GO:0006576	biogenic amine metabolic process	11	0.0047	1	0.0032	0.353672	D	0.680851
GO:0042221	response to chemical stimulus	11	0.0047	1	0.0032	0.353672	D	0.680851
GO:0006461	protein complex assembly	11	0.0047	1	0.0032	0.353672	D	0.680851
GO:0044431	Golgi apparatus part	12	0.0052	1	0.0033	0.339807	D	0.634615
GO:0016668	oxidoreductase activity, acting on sulfur group of donors, NAD or NADP as acceptor	12	0.0049	1	0.0032	0.337207	D	0.653061
GO:0015036	disulfide oxidoreductase activity	12	0.0049	1	0.0032	0.337207	D	0.653061
GO:0044271	nitrogen compound biosynthetic process	12	0.0051	1	0.0032	0.335014	D	0.627451
GO:0009309	amine biosynthetic process	12	0.0051	1	0.0032	0.335014	D	0.627451
GO:0006575	cellular amino acid derivative metabolic process	12	0.0051	1	0.0032	0.335014	D	0.627451
GO:0030234	enzyme regulator activity	13	0.0054	1	0.0032	0.317659	D	0.592593	F
GO:0015629	actin cytoskeleton	14	0.006	1	0.0033	0.300812	D	0.55
GO:0016810	hydrolase activity, acting on carbon-nitrogen (but not peptide) bonds	14	0.0058	1	0.0032	0.297455	D	0.551724
GO:0004527	exonuclease activity	14	0.0058	1	0.0032	0.297455	D	0.551724
GO:0043094	cellular metabolic compound salvage	14	0.0059	1	0.0032	0.294629	D	0.542373
GO:0006364	rRNA processing	14	0.0059	1	0.0032	0.294629	D	0.542373
GO:0009060	aerobic respiration	16	0.0068	2	0.0064	0.289209	D	0.941176
GO:0005794	Golgi apparatus	15	0.0065	1	0.0033	0.28072	D	0.507692	C
GO:0044463	cell projection part	15	0.0065	1	0.0033	0.28072	D	0.507692
GO:0045333	cellular respiration	18	0.0076	2	0.0064	0.278092	D	0.842105
GO:0015980	energy derivation by oxidation of organic compounds	18	0.0076	2	0.0064	0.278092	D	0.842105
GO:0031966	mitochondrial membrane	20	0.0086	2	0.0067	0.264403	D	0.77907
GO:0005743	mitochondrial inner membrane	20	0.0086	2	0.0067	0.264403	D	0.77907
GO:0005740	mitochondrial envelope	20	0.0086	2	0.0067	0.264403	D	0.77907
GO:0016072	rRNA metabolic process	16	0.0068	1	0.0032	0.253758	D	0.470588
GO:0032787	monocarboxylic acid metabolic process	21	0.0089	2	0.0064	0.249865	D	0.719101
GO:0043933	macromolecular complex subunit organization	23	0.0097	3	0.0096	0.241267	D	0.989691
GO:0016614	oxidoreductase activity, acting on CH-OH group of donors	22	0.0091	2	0.0063	0.241039	D	0.692308
GO:0016667	oxidoreductase activity, acting on sulfur group of donors	17	0.007	1	0.0032	0.237359	D	0.457143
GO:0006732	coenzyme metabolic process	25	0.0106	3	0.0096	0.236324	D	0.90566
GO:0005886	plasma membrane	26	0.0112	3	0.01	0.234287	D	0.892857	C
GO:0006261	DNA-dependent DNA replication	17	0.0072	1	0.0032	0.234036	D	0.444444
GO:0051186	cofactor metabolic process	27	0.0114	3	0.0096	0.226617	D	0.842105
GO:0004842	ubiquitin-protein ligase activity	18	0.0074	1	0.0032	0.218472	D	0.432432
GO:0016859	cis-trans isomerase activity	18	0.0074	1	0.0032	0.218472	D	0.432432
GO:0003755	peptidyl-prolyl cis-trans isomerase activity	18	0.0074	1	0.0032	0.218472	D	0.432432
GO:0016651	oxidoreductase activity, acting on NADH or NADPH	18	0.0074	1	0.0032	0.218472	D	0.432432
GO:0009451	RNA modification	24	0.0101	2	0.0064	0.214848	D	0.633663
GO:0009117	nucleotide metabolic process	29	0.0123	3	0.0096	0.213408	D	0.780488
GO:0006753	nucleoside phosphate metabolic process	29	0.0123	3	0.0096	0.213408	D	0.780488
GO:0006470	protein amino acid dephosphorylation	31	0.0131	4	0.0129	0.21044	D	0.984733
GO:0019787	small conjugating protein ligase activity	19	0.0078	1	0.0032	0.200455	D	0.410256
GO:0004721	phosphoprotein phosphatase activity	36	0.0148	4	0.0127	0.196097	D	0.858108	F
GO:0051276	chromosome organization	37	0.0156	4	0.0129	0.189337	D	0.826923
GO:0016311	dephosphorylation	39	0.0165	5	0.0161	0.189042	D	0.975758
GO:0044429	mitochondrial part	27	0.0116	2	0.0067	0.185647	D	0.577586
GO:0016741	transferase activity, transferring one-carbon groups	20	0.0082	1	0.0032	0.183403	D	0.390244
GO:0008168	methyltransferase activity	20	0.0082	1	0.0032	0.183403	D	0.390244
GO:0034660	ncRNA metabolic process	43	0.0182	5	0.0161	0.179706	D	0.884615
GO:0008415	acyltransferase activity	28	0.0115	2	0.0063	0.170214	D	0.547826
GO:0016746	transferase activity, transferring acyl groups	28	0.0115	2	0.0063	0.170214	D	0.547826
GO:0016747	transferase activity, transferring acyl groups other than amino-acyl groups	28	0.0115	2	0.0063	0.170214	D	0.547826
GO:0016192	vesicle-mediated transport	46	0.0195	5	0.0161	0.167446	D	0.825641
GO:0004518	nuclease activity	29	0.0119	2	0.0063	0.158893	D	0.529412	F
GO:0006520	cellular amino acid metabolic process	42	0.0178	4	0.0129	0.158115	D	0.724719
GO:0004386	helicase activity	55	0.0227	6	0.019	0.152984	D	0.837004
GO:0005275	amine transmembrane transporter activity	22	0.0091	1	0.0032	0.152385	D	0.351648
GO:0016853	isomerase activity	37	0.0152	3	0.0095	0.149319	D	0.625
GO:0034470	ncRNA processing	22	0.0093	1	0.0032	0.14911	D	0.344086
GO:0022891	substrate-specific transmembrane transporter activity	73	0.0301	9	0.0285	0.140473	D	0.946844
GO:0006996	organelle organization	73	0.0309	9	0.0289	0.139597	D	0.935275	P
GO:0006519	cellular amino acid and derivative metabolic process	52	0.022	5	0.0161	0.13569	D	0.731818	P
GO:0009308	cellular amine metabolic process	52	0.022	5	0.0161	0.13569	D	0.731818
GO:0015837	amine transport	23	0.0097	1	0.0032	0.135262	D	0.329897
GO:0006865	amino acid transport	23	0.0097	1	0.0032	0.135262	D	0.329897
GO:0016874	ligase activity	53	0.0218	5	0.0158	0.13297	D	0.724771
GO:0022892	substrate-specific transporter activity	82	0.0338	10	0.0316	0.132205	D	0.934911
GO:0034641	cellular nitrogen compound metabolic process	53	0.0224	5	0.0161	0.130003	D	0.71875
GO:0006807	nitrogen compound metabolic process	53	0.0224	5	0.0161	0.130003	D	0.71875
GO:0016881	acid-amino acid ligase activity	24	0.0099	1	0.0032	0.125535	D	0.323232
GO:0022804	active transmembrane transporter activity	68	0.028	7	0.0222	0.124635	D	0.792857
GO:0055086	nucleobase, nucleoside and nucleotide metabolic process	49	0.0207	4	0.0129	0.110815	D	0.623188
GO:0046942	carboxylic acid transport	25	0.0106	1	0.0032	0.110671	D	0.301887
GO:0015849	organic acid transport	25	0.0106	1	0.0032	0.110671	D	0.301887
GO:0016791	phosphatase activity	59	0.0243	5	0.0158	0.0998027	D	0.650206
GO:0042578	phosphoric ester hydrolase activity	68	0.028	6	0.019	0.0930546	D	0.678571
GO:0016757	transferase activity, transferring glycosyl groups	27	0.0111	1	0.0032	0.0926333	D	0.288288
GO:0016818	hydrolase activity, acting on acid anhydrides, in phosphorus-containing anhydrides	217	0.0894	28	0.0886	0.0842463	D	0.991051
GO:0016462	pyrophosphatase activity	217	0.0894	28	0.0886	0.0842463	D	0.991051
GO:0016817	hydrolase activity, acting on acid anhydrides	218	0.0898	28	0.0886	0.0840649	D	0.986637
GO:0006082	organic acid metabolic process	70	0.0296	6	0.0193	0.0810137	D	0.652027
GO:0019752	carboxylic acid metabolic process	70	0.0296	6	0.0193	0.0810137	D	0.652027	P
GO:0008654	phospholipid biosynthetic process	29	0.0123	1	0.0032	0.0726844	D	0.260163
GO:0051179	localization	223	0.0943	26	0.0836	0.0677685	D	0.886532
GO:0022857	transmembrane transporter activity	99	0.0408	9	0.0285	0.0648324	D	0.698529
GO:0016772	transferase activity, transferring phosphorus-containing groups	251	0.1034	29	0.0918	0.0627372	D	0.887814
GO:0016879	ligase activity, forming carbon-nitrogen bonds	31	0.0128	1	0.0032	0.0605592	D	0.25
GO:0006810	transport	209	0.0884	22	0.0707	0.0448296	D	0.799774	P
GO:0051234	establishment of localization	210	0.0888	22	0.0707	0.0433633	D	0.796171
GO:0016787	hydrolase activity	434	0.1788	50	0.1582	0.038143	D	0.884787	F
GO:0006644	phospholipid metabolic process	35	0.0148	1	0.0032	0.0372978	D	0.216216
GO:0006259	DNA metabolic process	74	0.0313	5	0.0161	0.0365031	D	0.514377	P
GO:0005215	transporter activity	120	0.0494	10	0.0316	0.0337561	D	0.639676	F
GO:0005739	mitochondrion	152	0.0654	13	0.0435	0.0264051	D	0.665138	C
GO:0006950	response to stress	38	0.0161	1	0.0032	0.0263815	D	0.198758	P
GO:0016788	hydrolase activity, acting on ester bonds	119	0.049	8	0.0253	0.01114	D	0.516327
GO:0016773	phosphotransferase activity, alcohol group as acceptor	185	0.0762	15	0.0475	0.0099962	D	0.62336
GO:0043167	ion binding	111	0.0457	7	0.0222	0.0098369	D	0.485777
GO:0043169	cation binding	111	0.0457	7	0.0222	0.0098369	D	0.485777
GO:0046872	metal ion binding	111	0.0457	7	0.0222	0.0098369	D	0.485777
GO:0016740	transferase activity	342	0.1409	33	0.1044	0.0090903	D	0.740951	F
GO:0050896	response to stimulus	47	0.0199	1	0.0032	0.0089901	D	0.160804
GO:0008610	lipid biosynthetic process	48	0.0203	1	0.0032	0.0079535	D	0.157635
GO:0016491	oxidoreductase activity	106	0.0437	6	0.019	0.0065552	D	0.434783	F
GO:0046914	transition metal ion binding	63	0.026	2	0.0063	0.0062441	D	0.242308
GO:0004674	protein serine/threonine kinase activity	117	0.0482	7	0.0222	0.0060771	D	0.460581
GO:0016301	kinase activity	206	0.0849	16	0.0506	0.0047589	D	0.595995	F
GO:0008270	zinc ion binding	57	0.0235	1	0.0032	0.0027933	D	0.13617	F
GO:0000166	nucleotide binding	340	0.1401	30	0.0949	0.0027895	D	0.677373	F
GO:0044255	cellular lipid metabolic process	59	0.0249	1	0.0032	0.0020063	D	0.128514
GO:0006793	phosphorus metabolic process	217	0.0918	16	0.0514	0.0019394	D	0.559913
GO:0006796	phosphate metabolic process	217	0.0918	16	0.0514	0.0019394	D	0.559913
GO:0043687	post-translational protein modification	202	0.0854	14	0.045	0.0014534	D	0.526932
GO:0032553	ribonucleotide binding	335	0.138	28	0.0886	0.001336	D	0.642029
GO:0032555	purine ribonucleotide binding	335	0.138	28	0.0886	0.001336	D	0.642029
GO:0016310	phosphorylation	175	0.074	11	0.0354	0.0012153	D	0.478378	P
GO:0017076	purine nucleotide binding	337	0.1389	28	0.0886	0.0011819	D	0.637869
GO:0006629	lipid metabolic process	67	0.0283	1	0.0032	0.0007165	D	0.113074	P
GO:0006468	protein amino acid phosphorylation	164	0.0693	9	0.0289	0.0005363	D	0.417027
GO:0004672	protein kinase activity	172	0.0709	9	0.0285	0.000303	D	0.401975	F
GO:0006464	protein modification process	253	0.107	17	0.0547	0.0002596	D	0.511215	P
GO:0043412	biopolymer modification	280	0.1184	19	0.0611	0.0001411	D	0.516047
GO:0003824	catalytic activity	1017	0.419	104	0.3291	0.0001065	D	0.785442	F
GO:0005524	ATP binding	300	0.1236	20	0.0633	7.93784e-05	D	0.512136
GO:0032559	adenyl ribonucleotide binding	300	0.1236	20	0.0633	7.93784e-05	D	0.512136
GO:0030554	adenyl nucleotide binding	302	0.1244	20	0.0633	6.74728e-05	D	0.508842
GO:0016020	membrane	353	0.1519	20	0.0669	1.0079e-06	D	0.440421
GO:0044425	membrane part	265	0.114	10	0.0334	8.28404e-08	D	0.292982
GO:0031224	intrinsic to membrane	237	0.102	5	0.0167	7.34911e-10	D	0.163725
GO:0016021	integral to membrane	237	0.102	5	0.0167	7.34911e-10	D	0.163725	C

## Sheet: 0-0-1-0
GO ID	GO Term	NB_IN_REF	FREQ_IN_REF	NB_IN_SET	FREQ_IN_SET	P-value	ENRICHMENT/DEPLETION	Ratio: F/D	Category
GO:0044463	cell projection part	15	0.0065	7	0.0435	2.51101e-05	E	6.69231			0-0-1-0 profile: Significant loss-of-fitness in BF only
GO:0005930	axoneme	7	0.003	5	0.0311	2.74983e-05	E	10.3667	C
GO:0043234	protein complex	242	0.1041	33	0.205	3.65562e-05	E	1.96926	C
GO:0032991	macromolecular complex	360	0.1549	42	0.2609	0.0001173	E	1.68431
GO:0044424	intracellular part	700	0.3012	69	0.4286	0.0001235	E	1.42297
GO:0042995	cell projection	25	0.0108	8	0.0497	0.0001517	E	4.60185
GO:0005622	intracellular	710	0.3055	69	0.4286	0.0001926	E	1.40295	C		GO slim set
GO:0051674	localization of cell	15	0.0063	6	0.0373	0.0002472	E	5.92063
GO:0006928	cell motion	15	0.0063	6	0.0373	0.0002472	E	5.92063			Categories:
GO:0030286	dynein complex	15	0.0065	6	0.0373	0.0002715	E	5.73846	C		P:Biological Process
GO:0007018	microtubule-based movement	19	0.008	6	0.0373	0.0010199	E	4.6625			C:Cellular Component
GO:0048870	cell motility	8	0.0034	4	0.0248	0.0011022	E	7.29412			F:Molecular Function
GO:0001539	ciliary or flagellar motility	8	0.0034	4	0.0248	0.0011022	E	7.29412	P
GO:0044447	axoneme part	4	0.0017	3	0.0186	0.001218	E	10.9412
GO:0005839	proteasome core complex	14	0.006	5	0.0311	0.0016083	E	5.18333
GO:0007017	microtubule-based process	38	0.0161	8	0.0497	0.0025215	E	3.08696
GO:0040011	locomotion	10	0.0042	4	0.0248	0.0028807	E	5.90476
GO:0003774	motor activity	69	0.0284	11	0.0696	0.0029165	E	2.4507	F
GO:0015630	microtubule cytoskeleton	85	0.0366	13	0.0807	0.0031018	E	2.20492
GO:0000502	proteasome complex	31	0.0133	7	0.0435	0.003388	E	3.27068	C
GO:0051641	cellular localization	58	0.0245	10	0.0621	0.0034357	E	2.53469
GO:0051649	establishment of localization in cell	58	0.0245	10	0.0621	0.0034357	E	2.53469
GO:0046907	intracellular transport	50	0.0211	9	0.0559	0.0040321	E	2.64929
GO:0005875	microtubule associated complex	69	0.0297	11	0.0683	0.0045212	E	2.29966
GO:0010970	microtubule-based transport	2	0.0008	2	0.0124	0.0046075	E	15.5
GO:0019773	proteasome core complex, alpha-subunit complex	2	0.0009	2	0.0124	0.0047716	E	13.7778
GO:0001534	radial spoke	2	0.0009	2	0.0124	0.0047716	E	13.7778
GO:0044430	cytoskeletal part	90	0.0387	13	0.0807	0.0048999	E	2.08527
GO:0005856	cytoskeleton	101	0.0435	14	0.087	0.0051211	E	2	C
GO:0005732	small nucleolar ribonucleoprotein complex	6	0.0026	3	0.0186	0.0052885	E	7.15385
GO:0044422	organelle part	248	0.1067	26	0.1615	0.0079882	E	1.51359
GO:0043226	organelle	561	0.2414	50	0.3106	0.0083097	E	1.28666	C
GO:0043229	intracellular organelle	561	0.2414	50	0.3106	0.0083097	E	1.28666
GO:0003777	microtubule motor activity	22	0.0091	5	0.0316	0.0095294	E	3.47253
GO:0030515	snoRNA binding	3	0.0012	2	0.0127	0.0118261	E	10.5833
GO:0030705	cytoskeleton-dependent intracellular transport	3	0.0013	2	0.0124	0.0128925	E	9.53846
GO:0005868	cytoplasmic dynein complex	3	0.0013	2	0.0124	0.0133345	E	9.53846
GO:0017111	nucleoside-triphosphatase activity	212	0.0874	21	0.1329	0.0140189	E	1.52059
GO:0016818	hydrolase activity, acting on acid anhydrides, in phosphorus-containing anhydrides	217	0.0894	21	0.1329	0.017027	E	1.48658
GO:0016462	pyrophosphatase activity	217	0.0894	21	0.1329	0.017027	E	1.48658
GO:0009987	cellular process	1293	0.5467	98	0.6087	0.0172261	E	1.11341
GO:0003899	DNA-directed RNA polymerase activity	17	0.007	4	0.0253	0.0175262	E	3.61429
GO:0034062	RNA polymerase activity	17	0.007	4	0.0253	0.0175262	E	3.61429
GO:0016817	hydrolase activity, acting on acid anhydrides	218	0.0898	21	0.1329	0.017674	E	1.47996
GO:0051179	localization	223	0.0943	22	0.1366	0.018791	E	1.44857
GO:0004175	endopeptidase activity	57	0.0235	8	0.0506	0.0189322	E	2.15319
GO:0043228	non-membrane-bounded organelle	222	0.0955	22	0.1366	0.0208313	E	1.43037
GO:0043232	intracellular non-membrane-bounded organelle	222	0.0955	22	0.1366	0.0208313	E	1.43037
GO:0019861	flagellum	17	0.0073	4	0.0248	0.0212364	E	3.39726
GO:0016774	phosphotransferase activity, carboxyl group as acceptor	4	0.0016	2	0.0127	0.02213	E	7.9375
GO:0004618	phosphoglycerate kinase activity	4	0.0016	2	0.0127	0.02213	E	7.9375
GO:0005623	cell	998	0.4294	78	0.4845	0.0225611	E	1.12832	C
GO:0044464	cell part	998	0.4294	78	0.4845	0.0225611	E	1.12832
GO:0006206	pyrimidine base metabolic process	4	0.0017	2	0.0124	0.0240492	E	7.29412
GO:0043227	membrane-bounded organelle	360	0.1549	32	0.1988	0.0249572	E	1.28341
GO:0043231	intracellular membrane-bounded organelle	360	0.1549	32	0.1988	0.0249572	E	1.28341
GO:0005634	nucleus	140	0.0602	15	0.0932	0.0266726	E	1.54817	C
GO:0006511	ubiquitin-dependent protein catabolic process	38	0.0161	6	0.0373	0.0281712	E	2.31677	P
GO:0043632	modification-dependent macromolecule catabolic process	38	0.0161	6	0.0373	0.0281712	E	2.31677
GO:0051603	proteolysis involved in cellular protein catabolic process	38	0.0161	6	0.0373	0.0281712	E	2.31677
GO:0044257	cellular protein catabolic process	38	0.0161	6	0.0373	0.0281712	E	2.31677
GO:0019941	modification-dependent protein catabolic process	38	0.0161	6	0.0373	0.0281712	E	2.31677
GO:0006605	protein targeting	11	0.0047	3	0.0186	0.0293744	E	3.95745
GO:0045293	mRNA editing complex	11	0.0047	3	0.0186	0.0306441	E	3.95745
GO:0005515	protein binding	130	0.0536	13	0.0823	0.0362765	E	1.53545	F
GO:0044446	intracellular organelle part	240	0.1033	22	0.1366	0.0365327	E	1.32236
GO:0009112	nucleobase metabolic process	5	0.0021	2	0.0124	0.0373827	E	5.90476
GO:0016779	nucleotidyltransferase activity	32	0.0132	5	0.0316	0.0377169	E	2.39394
GO:0016787	hydrolase activity	434	0.1788	34	0.2152	0.038715	E	1.20358	F
GO:0034962	cellular biopolymer catabolic process	42	0.0178	6	0.0373	0.0406231	E	2.09551
GO:0044265	cellular macromolecule catabolic process	65	0.0275	8	0.0497	0.0410437	E	1.80727
GO:0070011	peptidase activity, acting on L-amino acid peptides	70	0.0288	8	0.0506	0.0461277	E	1.75694
GO:0015031	protein transport	34	0.0144	5	0.0311	0.0521653	E	2.15972	P
GO:0045184	establishment of protein localization	34	0.0144	5	0.0311	0.0521653	E	2.15972
GO:0008104	protein localization	34	0.0144	5	0.0311	0.0521653	E	2.15972
GO:0000087	M phase of mitotic cell cycle	6	0.0025	2	0.0124	0.0522962	E	4.96
GO:0048285	organelle fission	6	0.0025	2	0.0124	0.0522962	E	4.96
GO:0007067	mitosis	6	0.0025	2	0.0124	0.0522962	E	4.96
GO:0000280	nuclear division	6	0.0025	2	0.0124	0.0522962	E	4.96
GO:0031019	mitochondrial mRNA editing complex	6	0.0026	2	0.0124	0.0538823	E	4.76923
GO:0044442	microtubule-based flagellum part	6	0.0026	2	0.0124	0.0538823	E	4.76923
GO:0044460	flagellum part	6	0.0026	2	0.0124	0.0538823	E	4.76923
GO:0008233	peptidase activity	73	0.0301	8	0.0506	0.0539178	E	1.68106	F
GO:0016192	vesicle-mediated transport	46	0.0195	6	0.0373	0.0550193	E	1.91282
GO:0016876	ligase activity, forming aminoacyl-tRNA and related compounds	15	0.0062	3	0.019	0.0556971	E	3.06452
GO:0004812	aminoacyl-tRNA ligase activity	15	0.0062	3	0.019	0.0556971	E	3.06452
GO:0016875	ligase activity, forming carbon-oxygen bonds	15	0.0062	3	0.019	0.0556971	E	3.06452
GO:0033036	macromolecule localization	35	0.0148	5	0.0311	0.0567865	E	2.10135
GO:0051726	regulation of cell cycle	15	0.0063	3	0.0186	0.0613366	E	2.95238
GO:0016772	transferase activity, transferring phosphorus-containing groups	251	0.1034	20	0.1266	0.0623684	E	1.22437
GO:0004820	glycine-tRNA ligase activity	1	0.0004	1	0.0063	0.0651009	E	15.75
GO:0004819	glutamine-tRNA ligase activity	1	0.0004	1	0.0063	0.0651009	E	15.75
GO:0016812	hydrolase activity, acting on carbon-nitrogen (but not peptide) bonds, in cyclic amides	1	0.0004	1	0.0063	0.0651009	E	15.75
GO:0005545	phosphatidylinositol binding	1	0.0004	1	0.0063	0.0651009	E	15.75
GO:0045309	protein phosphorylated amino acid binding	1	0.0004	1	0.0063	0.0651009	E	15.75
GO:0005543	phospholipid binding	1	0.0004	1	0.0063	0.0651009	E	15.75
GO:0020037	heme binding	1	0.0004	1	0.0063	0.0651009	E	15.75
GO:0051219	phosphoprotein binding	1	0.0004	1	0.0063	0.0651009	E	15.75
GO:0004821	histidine-tRNA ligase activity	1	0.0004	1	0.0063	0.0651009	E	15.75
GO:0046906	tetrapyrrole binding	1	0.0004	1	0.0063	0.0651009	E	15.75
GO:0019901	protein kinase binding	1	0.0004	1	0.0063	0.0651009	E	15.75
GO:0005080	protein kinase C binding	1	0.0004	1	0.0063	0.0651009	E	15.75
GO:0019900	kinase binding	1	0.0004	1	0.0063	0.0651009	E	15.75
GO:0008060	ARF GTPase activator activity	1	0.0004	1	0.0063	0.0651009	E	15.75
GO:0004586	ornithine decarboxylase activity	1	0.0004	1	0.0063	0.0651009	E	15.75
GO:0035091	phosphoinositide binding	1	0.0004	1	0.0063	0.0651009	E	15.75
GO:0034613	cellular protein localization	26	0.011	4	0.0248	0.0677511	E	2.25455
GO:0070727	cellular macromolecule localization	26	0.011	4	0.0248	0.0677511	E	2.25455
GO:0006886	intracellular protein transport	26	0.011	4	0.0248	0.0677511	E	2.25455
GO:0016265	death	1	0.0004	1	0.0062	0.0680761	E	15.5	P
GO:0008219	cell death	1	0.0004	1	0.0062	0.0680761	E	15.5	P
GO:0050810	regulation of steroid biosynthetic process	1	0.0004	1	0.0062	0.0680761	E	15.5
GO:0000077	DNA damage checkpoint	1	0.0004	1	0.0062	0.0680761	E	15.5
GO:0006273	lagging strand elongation	1	0.0004	1	0.0062	0.0680761	E	15.5
GO:0031570	DNA integrity checkpoint	1	0.0004	1	0.0062	0.0680761	E	15.5
GO:0006425	glutaminyl-tRNA aminoacylation	1	0.0004	1	0.0062	0.0680761	E	15.5
GO:0010564	regulation of cell cycle process	1	0.0004	1	0.0062	0.0680761	E	15.5
GO:0047496	vesicle transport along microtubule	1	0.0004	1	0.0062	0.0680761	E	15.5
GO:0042770	DNA damage response, signal transduction	1	0.0004	1	0.0062	0.0680761	E	15.5
GO:0042073	intraflagellar transport	1	0.0004	1	0.0062	0.0680761	E	15.5
GO:0046890	regulation of lipid biosynthetic process	1	0.0004	1	0.0062	0.0680761	E	15.5
GO:0000075	cell cycle checkpoint	1	0.0004	1	0.0062	0.0680761	E	15.5
GO:0006426	glycyl-tRNA aminoacylation	1	0.0004	1	0.0062	0.0680761	E	15.5
GO:0007088	regulation of mitosis	1	0.0004	1	0.0062	0.0680761	E	15.5
GO:0012501	programmed cell death	1	0.0004	1	0.0062	0.0680761	E	15.5
GO:0007346	regulation of mitotic cell cycle	1	0.0004	1	0.0062	0.0680761	E	15.5
GO:0019218	regulation of steroid metabolic process	1	0.0004	1	0.0062	0.0680761	E	15.5
GO:0051783	regulation of nuclear division	1	0.0004	1	0.0062	0.0680761	E	15.5
GO:0006271	DNA strand elongation during DNA replication	1	0.0004	1	0.0062	0.0680761	E	15.5
GO:0006427	histidyl-tRNA aminoacylation	1	0.0004	1	0.0062	0.0680761	E	15.5
GO:0006869	lipid transport	1	0.0004	1	0.0062	0.0680761	E	15.5
GO:0006915	apoptosis	1	0.0004	1	0.0062	0.0680761	E	15.5
GO:0019216	regulation of lipid metabolic process	1	0.0004	1	0.0062	0.0680761	E	15.5
GO:0007076	mitotic chromosome condensation	1	0.0004	1	0.0062	0.0680761	E	15.5
GO:0022616	DNA strand elongation	1	0.0004	1	0.0062	0.0680761	E	15.5
GO:0030261	chromosome condensation	1	0.0004	1	0.0062	0.0680761	E	15.5
GO:0000279	M phase	7	0.003	2	0.0124	0.0682799	E	4.13333
GO:0016197	endosome transport	7	0.003	2	0.0124	0.0682799	E	4.13333
GO:0005488	binding	825	0.3399	54	0.3418	0.0689974	E	1.00559	F
GO:0000152	nuclear ubiquitin ligase complex	1	0.0004	1	0.0062	0.0692771	E	15.5
GO:0044452	nucleolar part	1	0.0004	1	0.0062	0.0692771	E	15.5
GO:0005680	anaphase-promoting complex	1	0.0004	1	0.0062	0.0692771	E	15.5
GO:0048500	signal recognition particle	1	0.0004	1	0.0062	0.0692771	E	15.5
GO:0005786	signal recognition particle, endoplasmic reticulum targeting	1	0.0004	1	0.0062	0.0692771	E	15.5
GO:0005736	DNA-directed RNA polymerase I complex	1	0.0004	1	0.0062	0.0692771	E	15.5
GO:0009345	glycine-tRNA ligase complex	1	0.0004	1	0.0062	0.0692771	E	15.5
GO:0000151	ubiquitin ligase complex	1	0.0004	1	0.0062	0.0692771	E	15.5
GO:0016043	cellular component organization	102	0.0431	10	0.0621	0.0692988	E	1.44084	P
GO:0009057	macromolecule catabolic process	117	0.0495	11	0.0683	0.0718671	E	1.3798
GO:0030163	protein catabolic process	90	0.0381	9	0.0559	0.0733535	E	1.46719
GO:0032559	adenyl ribonucleotide binding	300	0.1236	22	0.1392	0.0788286	E	1.12621
GO:0005524	ATP binding	300	0.1236	22	0.1392	0.0788286	E	1.12621
GO:0032553	ribonucleotide binding	335	0.138	24	0.1519	0.0799973	E	1.10072
GO:0032555	purine ribonucleotide binding	335	0.138	24	0.1519	0.0799973	E	1.10072
GO:0030554	adenyl nucleotide binding	302	0.1244	22	0.1392	0.080369	E	1.11897
GO:0017076	purine nucleotide binding	337	0.1389	24	0.1519	0.0812519	E	1.09359
GO:0000166	nucleotide binding	340	0.1401	24	0.1519	0.0830093	E	1.08423	F
GO:0043285	biopolymer catabolic process	94	0.0397	9	0.0559	0.0837651	E	1.40806
GO:0000278	mitotic cell cycle	8	0.0034	2	0.0124	0.0849011	E	3.64706
GO:0022403	cell cycle phase	8	0.0034	2	0.0124	0.0849011	E	3.64706
GO:0006418	tRNA aminoacylation for protein translation	18	0.0076	3	0.0186	0.089264	E	2.44737
GO:0004674	protein serine/threonine kinase activity	117	0.0482	10	0.0633	0.0918694	E	1.31328
GO:0004198	calcium-dependent cysteine-type endopeptidase activity	9	0.0037	2	0.0127	0.0951697	E	3.43243
GO:0006810	transport	209	0.0884	16	0.0994	0.0958986	E	1.12443	P
GO:0051234	establishment of localization	210	0.0888	16	0.0994	0.0968262	E	1.11937
GO:0043039	tRNA aminoacylation	19	0.008	3	0.0186	0.098865	E	2.325
GO:0043038	amino acid activation	19	0.008	3	0.0186	0.098865	E	2.325
GO:0016301	kinase activity	206	0.0849	15	0.0949	0.100469	E	1.11779	F
GO:0046483	heterocycle metabolic process	9	0.0038	2	0.0124	0.101795	E	3.26316
GO:0006323	DNA packaging	9	0.0038	2	0.0124	0.101795	E	3.26316
GO:0022402	cell cycle process	9	0.0038	2	0.0124	0.101795	E	3.26316
GO:0034961	cellular biopolymer biosynthetic process	218	0.0922	16	0.0994	0.103025	E	1.07809
GO:0043284	biopolymer biosynthetic process	219	0.0926	16	0.0994	0.103639	E	1.07343
GO:0009434	microtubule-based flagellum	9	0.0039	2	0.0124	0.10448	E	3.17949
GO:0006996	organelle organization	73	0.0309	7	0.0435	0.106009	E	1.40777	P
GO:0044248	cellular catabolic process	88	0.0372	8	0.0497	0.106465	E	1.33602
GO:0006508	proteolysis	89	0.0376	8	0.0497	0.109119	E	1.32181
GO:0016070	RNA metabolic process	190	0.0803	14	0.087	0.109582	E	1.08344
GO:0016310	phosphorylation	175	0.074	13	0.0807	0.112648	E	1.09054	P
GO:0009056	catabolic process	141	0.0596	11	0.0683	0.115094	E	1.14597	P
GO:0006468	protein amino acid phosphorylation	164	0.0693	12	0.0745	0.11917	E	1.07504
GO:0004672	protein kinase activity	172	0.0709	12	0.0759	0.119384	E	1.07052	F
GO:0005102	receptor binding	2	0.0008	1	0.0063	0.121776	E	7.875	F
GO:0008289	lipid binding	2	0.0008	1	0.0063	0.121776	E	7.875	F
GO:0005179	hormone activity	2	0.0008	1	0.0063	0.121776	E	7.875
GO:0003954	NADH dehydrogenase activity	2	0.0008	1	0.0063	0.121776	E	7.875
GO:0005096	GTPase activator activity	2	0.0008	1	0.0063	0.121776	E	7.875
GO:0050136	NADH dehydrogenase (quinone) activity	2	0.0008	1	0.0063	0.121776	E	7.875
GO:0004798	thymidylate kinase activity	2	0.0008	1	0.0063	0.121776	E	7.875
GO:0016655	oxidoreductase activity, acting on NADH or NADPH, quinone or similar compound as acceptor	2	0.0008	1	0.0063	0.121776	E	7.875
GO:0008047	enzyme activator activity	2	0.0008	1	0.0063	0.121776	E	7.875
GO:0008137	NADH dehydrogenase (ubiquinone) activity	2	0.0008	1	0.0063	0.121776	E	7.875
GO:0006234	TTP biosynthetic process	2	0.0008	1	0.0062	0.126937	E	7.75
GO:0022900	electron transport chain	2	0.0008	1	0.0062	0.126937	E	7.75
GO:0033692	cellular polysaccharide biosynthetic process	2	0.0008	1	0.0062	0.126937	E	7.75
GO:0009103	lipopolysaccharide biosynthetic process	2	0.0008	1	0.0062	0.126937	E	7.75
GO:0055114	oxidation reduction	2	0.0008	1	0.0062	0.126937	E	7.75
GO:0006120	mitochondrial electron transport, NADH to ubiquinone	2	0.0008	1	0.0062	0.126937	E	7.75
GO:0042147	retrograde transport, endosome to Golgi	2	0.0008	1	0.0062	0.126937	E	7.75
GO:0044264	cellular polysaccharide metabolic process	2	0.0008	1	0.0062	0.126937	E	7.75
GO:0042773	ATP synthesis coupled electron transport	2	0.0008	1	0.0062	0.126937	E	7.75
GO:0046046	TTP metabolic process	2	0.0008	1	0.0062	0.126937	E	7.75
GO:0005976	polysaccharide metabolic process	2	0.0008	1	0.0062	0.126937	E	7.75
GO:0008653	lipopolysaccharide metabolic process	2	0.0008	1	0.0062	0.126937	E	7.75
GO:0016191	synaptic vesicle uncoating	2	0.0008	1	0.0062	0.126937	E	7.75
GO:0046112	nucleobase biosynthetic process	2	0.0008	1	0.0062	0.126937	E	7.75
GO:0034404	nucleobase, nucleoside and nucleotide biosynthetic process	2	0.0008	1	0.0062	0.126937	E	7.75
GO:0042775	mitochondrial ATP synthesis coupled electron transport	2	0.0008	1	0.0062	0.126937	E	7.75
GO:0048488	synaptic vesicle endocytosis	2	0.0008	1	0.0062	0.126937	E	7.75
GO:0008655	pyrimidine salvage	2	0.0008	1	0.0062	0.126937	E	7.75
GO:0019856	pyrimidine base biosynthetic process	2	0.0008	1	0.0062	0.126937	E	7.75
GO:0022904	respiratory electron transport chain	2	0.0008	1	0.0062	0.126937	E	7.75
GO:0065002	intracellular protein transmembrane transport	2	0.0008	1	0.0062	0.126937	E	7.75
GO:0034654	nucleobase, nucleoside, nucleotide and nucleic acid biosynthetic process	2	0.0008	1	0.0062	0.126937	E	7.75
GO:0030150	protein import into mitochondrial matrix	2	0.0008	1	0.0062	0.126937	E	7.75
GO:0003924	GTPase activity	23	0.0095	3	0.019	0.127329	E	2
GO:0005768	endosome	2	0.0009	1	0.0062	0.129011	E	6.88889	C
GO:0030140	trans-Golgi network transport vesicle	2	0.0009	1	0.0062	0.129011	E	6.88889
GO:0030130	clathrin coat of trans-Golgi network vesicle	2	0.0009	1	0.0062	0.129011	E	6.88889
GO:0016529	sarcoplasmic reticulum	2	0.0009	1	0.0062	0.129011	E	6.88889
GO:0005802	trans-Golgi network	2	0.0009	1	0.0062	0.129011	E	6.88889
GO:0055029	nuclear DNA-directed RNA polymerase complex	2	0.0009	1	0.0062	0.129011	E	6.88889
GO:0005858	axonemal dynein complex	2	0.0009	1	0.0062	0.129011	E	6.88889
GO:0030880	RNA polymerase complex	2	0.0009	1	0.0062	0.129011	E	6.88889
GO:0000428	DNA-directed RNA polymerase complex	2	0.0009	1	0.0062	0.129011	E	6.88889
GO:0035086	flagellar axoneme	2	0.0009	1	0.0062	0.129011	E	6.88889
GO:0016528	sarcoplasm	2	0.0009	1	0.0062	0.129011	E	6.88889
GO:0012510	trans-Golgi network transport vesicle membrane	2	0.0009	1	0.0062	0.129011	E	6.88889
GO:0003723	RNA binding	124	0.0511	9	0.057	0.132888	E	1.11546	F
GO:0006350	transcription	36	0.0152	4	0.0248	0.133067	E	1.63158	P
GO:0030529	ribonucleoprotein complex	118	0.0508	9	0.0559	0.134728	E	1.10039
GO:0043933	macromolecular complex subunit organization	23	0.0097	3	0.0186	0.136689	E	1.91753
GO:0051276	chromosome organization	37	0.0156	4	0.0248	0.139139	E	1.58974
GO:0009451	RNA modification	24	0.0101	3	0.0186	0.145677	E	1.84158
GO:0007049	cell cycle	39	0.0165	4	0.0248	0.150692	E	1.50303	P
GO:0005730	nucleolus	12	0.0052	2	0.0124	0.154713	E	2.38462	C
GO:0005815	microtubule organizing center	12	0.0052	2	0.0124	0.154713	E	2.38462	C
GO:0006457	protein folding	97	0.041	7	0.0435	0.156079	E	1.06098
GO:0030234	enzyme regulator activity	13	0.0054	2	0.0127	0.157893	E	2.35185	F
GO:0050794	regulation of cellular process	77	0.0326	6	0.0373	0.160768	E	1.14417
GO:0008380	RNA splicing	26	0.011	3	0.0186	0.162722	E	1.69091
GO:0050789	regulation of biological process	80	0.0338	6	0.0373	0.165077	E	1.10355	P
GO:0006091	generation of precursor metabolites and energy	42	0.0178	4	0.0248	0.166266	E	1.39326	P
GO:0006725	cellular aromatic compound metabolic process	13	0.0055	2	0.0124	0.166747	E	2.25455
GO:0006399	tRNA metabolic process	27	0.0114	3	0.0186	0.170696	E	1.63158
GO:0003876	AMP deaminase activity	3	0.0012	1	0.0063	0.170838	E	5.25
GO:0005506	iron ion binding	3	0.0012	1	0.0063	0.170838	E	5.25
GO:0034660	ncRNA metabolic process	43	0.0182	4	0.0248	0.170929	E	1.36264
GO:0016810	hydrolase activity, acting on carbon-nitrogen (but not peptide) bonds	14	0.0058	2	0.0127	0.172304	E	2.18966
GO:0032984	macromolecular complex disassembly	3	0.0013	1	0.0062	0.177513	E	4.76923
GO:0000910	cytokinesis	3	0.0013	1	0.0062	0.177513	E	4.76923
GO:0006816	calcium ion transport	3	0.0013	1	0.0062	0.177513	E	4.76923
GO:0030030	cell projection organization	3	0.0013	1	0.0062	0.177513	E	4.76923
GO:0007034	vacuolar transport	3	0.0013	1	0.0062	0.177513	E	4.76923
GO:0006694	steroid biosynthetic process	3	0.0013	1	0.0062	0.177513	E	4.76923
GO:0070585	protein localization in mitochondrion	3	0.0013	1	0.0062	0.177513	E	4.76923
GO:0043624	cellular protein complex disassembly	3	0.0013	1	0.0062	0.177513	E	4.76923
GO:0006626	protein targeting to mitochondrion	3	0.0013	1	0.0062	0.177513	E	4.76923
GO:0000271	polysaccharide biosynthetic process	3	0.0013	1	0.0062	0.177513	E	4.76923
GO:0051301	cell division	3	0.0013	1	0.0062	0.177513	E	4.76923
GO:0008202	steroid metabolic process	3	0.0013	1	0.0062	0.177513	E	4.76923
GO:0043241	protein complex disassembly	3	0.0013	1	0.0062	0.177513	E	4.76923
GO:0051261	protein depolymerization	3	0.0013	1	0.0062	0.177513	E	4.76923
GO:0006596	polyamine biosynthetic process	3	0.0013	1	0.0062	0.177513	E	4.76923
GO:0006839	mitochondrial transport	3	0.0013	1	0.0062	0.177513	E	4.76923
GO:0034623	cellular macromolecular complex disassembly	3	0.0013	1	0.0062	0.177513	E	4.76923
GO:0000070	mitotic sister chromatid segregation	3	0.0013	1	0.0062	0.177513	E	4.76923
GO:0006623	protein targeting to vacuole	3	0.0013	1	0.0062	0.177513	E	4.76923
GO:0048489	synaptic vesicle transport	3	0.0013	1	0.0062	0.177513	E	4.76923
GO:0022411	cellular component disassembly	3	0.0013	1	0.0062	0.177513	E	4.76923
GO:0043064	flagellum organization	3	0.0013	1	0.0062	0.177513	E	4.76923
GO:0000819	sister chromatid segregation	3	0.0013	1	0.0062	0.177513	E	4.76923
GO:0000796	condensin complex	3	0.0013	1	0.0062	0.180182	E	4.76923
GO:0000793	condensed chromosome	3	0.0013	1	0.0062	0.180182	E	4.76923
GO:0044428	nuclear part	46	0.0198	4	0.0248	0.186162	E	1.25253
GO:0044085	cellular component biogenesis	48	0.0203	4	0.0248	0.189848	E	1.22167
GO:0031974	membrane-enclosed lumen	30	0.0129	3	0.0186	0.195516	E	1.44186
GO:0070013	intracellular organelle lumen	30	0.0129	3	0.0186	0.195516	E	1.44186
GO:0043233	organelle lumen	30	0.0129	3	0.0186	0.195516	E	1.44186
GO:0016874	ligase activity	53	0.0218	4	0.0253	0.196554	E	1.16055
GO:0005838	proteasome regulatory particle	15	0.0065	2	0.0124	0.198746	E	1.90769
GO:0006519	cellular amino acid and derivative metabolic process	52	0.022	4	0.0248	0.199465	E	1.12727	P
GO:0009308	cellular amine metabolic process	52	0.022	4	0.0248	0.199465	E	1.12727
GO:0004386	helicase activity	55	0.0227	4	0.0253	0.200185	E	1.11454
GO:0051082	unfolded protein binding	55	0.0227	4	0.0253	0.200185	E	1.11454
GO:0006807	nitrogen compound metabolic process	53	0.0224	4	0.0248	0.201103	E	1.10714
GO:0034641	cellular nitrogen compound metabolic process	53	0.0224	4	0.0248	0.201103	E	1.10714
GO:0000398	nuclear mRNA splicing, via spliceosome	16	0.0068	2	0.0124	0.207925	E	1.82353
GO:0000375	RNA splicing, via transesterification reactions	16	0.0068	2	0.0124	0.207925	E	1.82353
GO:0000377	RNA splicing, via transesterification reactions with bulged adenosine as nucleophile	16	0.0068	2	0.0124	0.207925	E	1.82353
GO:0006096	glycolysis	16	0.0068	2	0.0124	0.207925	E	1.82353
GO:0007242	intracellular signaling cascade	33	0.014	3	0.0186	0.209143	E	1.32857
GO:0022624	proteasome accessory complex	16	0.0069	2	0.0124	0.211498	E	1.7971
GO:0009260	ribonucleotide biosynthetic process	17	0.0072	2	0.0124	0.219698	E	1.72222
GO:0016044	membrane organization	17	0.0072	2	0.0124	0.219698	E	1.72222
GO:0006261	DNA-dependent DNA replication	17	0.0072	2	0.0124	0.219698	E	1.72222
GO:0009259	ribonucleotide metabolic process	17	0.0072	2	0.0124	0.219698	E	1.72222
GO:0007005	mitochondrion organization	4	0.0017	1	0.0062	0.220652	E	3.64706	P
GO:0009156	ribonucleoside monophosphate biosynthetic process	4	0.0017	1	0.0062	0.220652	E	3.64706
GO:0009124	nucleoside monophosphate biosynthetic process	4	0.0017	1	0.0062	0.220652	E	3.64706
GO:0009161	ribonucleoside monophosphate metabolic process	4	0.0017	1	0.0062	0.220652	E	3.64706
GO:0009208	pyrimidine ribonucleoside triphosphate metabolic process	4	0.0017	1	0.0062	0.220652	E	3.64706
GO:0051128	regulation of cellular component organization	4	0.0017	1	0.0062	0.220652	E	3.64706
GO:0009306	protein secretion	4	0.0017	1	0.0062	0.220652	E	3.64706
GO:0009147	pyrimidine nucleoside triphosphate metabolic process	4	0.0017	1	0.0062	0.220652	E	3.64706
GO:0015674	di-, tri-valent inorganic cation transport	4	0.0017	1	0.0062	0.220652	E	3.64706
GO:0009167	purine ribonucleoside monophosphate metabolic process	4	0.0017	1	0.0062	0.220652	E	3.64706
GO:0033043	regulation of organelle organization	4	0.0017	1	0.0062	0.220652	E	3.64706
GO:0009123	nucleoside monophosphate metabolic process	4	0.0017	1	0.0062	0.220652	E	3.64706
GO:0009127	purine nucleoside monophosphate biosynthetic process	4	0.0017	1	0.0062	0.220652	E	3.64706
GO:0009209	pyrimidine ribonucleoside triphosphate biosynthetic process	4	0.0017	1	0.0062	0.220652	E	3.64706
GO:0033365	protein localization in organelle	4	0.0017	1	0.0062	0.220652	E	3.64706
GO:0009126	purine nucleoside monophosphate metabolic process	4	0.0017	1	0.0062	0.220652	E	3.64706
GO:0009168	purine ribonucleoside monophosphate biosynthetic process	4	0.0017	1	0.0062	0.220652	E	3.64706
GO:0016651	oxidoreductase activity, acting on NADH or NADPH	18	0.0074	2	0.0127	0.221701	E	1.71622
GO:0044262	cellular carbohydrate metabolic process	36	0.0152	3	0.0186	0.221727	E	1.22368
GO:0005853	eukaryotic translation elongation factor 1 complex	4	0.0017	1	0.0062	0.223682	E	3.64706
GO:0000177	cytoplasmic exosome (RNase complex)	4	0.0017	1	0.0062	0.223682	E	3.64706
GO:0020016	flagellar pocket	4	0.0017	1	0.0062	0.223682	E	3.64706
GO:0005932	microtubule basal body	4	0.0017	1	0.0062	0.223682	E	3.64706
GO:0046860	glycosome membrane	4	0.0017	1	0.0062	0.223682	E	3.64706
GO:0034621	cellular macromolecular complex subunit organization	18	0.0076	2	0.0124	0.230423	E	1.63158
GO:0007165	signal transduction	40	0.0169	3	0.0186	0.23161	E	1.10059	P
GO:0007154	cell communication	41	0.0173	3	0.0186	0.232913	E	1.07514	P
GO:0008026	ATP-dependent helicase activity	44	0.0181	3	0.019	0.233481	E	1.04972
GO:0070035	purine NTP-dependent helicase activity	44	0.0181	3	0.019	0.233481	E	1.04972
GO:0006520	cellular amino acid metabolic process	42	0.0178	3	0.0186	0.233776	E	1.04494
GO:0044459	plasma membrane part	18	0.0077	2	0.0124	0.233778	E	1.61039
GO:0005975	carbohydrate metabolic process	43	0.0182	3	0.0186	0.234216	E	1.02198	P
GO:0065003	macromolecular complex assembly	20	0.0085	2	0.0124	0.248681	E	1.45882
GO:0009165	nucleotide biosynthetic process	20	0.0085	2	0.0124	0.248681	E	1.45882
GO:0008234	cysteine-type peptidase activity	21	0.0087	2	0.0127	0.248904	E	1.45977
GO:0004197	cysteine-type endopeptidase activity	21	0.0087	2	0.0127	0.248904	E	1.45977
GO:0003779	actin binding	5	0.0021	1	0.0063	0.249033	E	3	F
GO:0016814	hydrolase activity, acting on carbon-nitrogen (but not peptide) bonds, in cyclic amidines	5	0.0021	1	0.0063	0.249033	E	3
GO:0016831	carboxy-lyase activity	5	0.0021	1	0.0063	0.249033	E	3
GO:0020015	glycosome	20	0.0086	2	0.0124	0.25165	E	1.44186	C
GO:0006397	mRNA processing	21	0.0089	2	0.0124	0.256222	E	1.39326
GO:0007059	chromosome segregation	5	0.0021	1	0.0062	0.257123	E	2.95238
GO:0009220	pyrimidine ribonucleotide biosynthetic process	5	0.0021	1	0.0062	0.257123	E	2.95238
GO:0006595	polyamine metabolic process	5	0.0021	1	0.0062	0.257123	E	2.95238
GO:0006221	pyrimidine nucleotide biosynthetic process	5	0.0021	1	0.0062	0.257123	E	2.95238
GO:0009218	pyrimidine ribonucleotide metabolic process	5	0.0021	1	0.0062	0.257123	E	2.95238
GO:0006220	pyrimidine nucleotide metabolic process	5	0.0021	1	0.0062	0.257123	E	2.95238
GO:0005576	extracellular region	5	0.0022	1	0.0062	0.260319	E	2.81818	C
GO:0030125	clathrin vesicle coat	5	0.0022	1	0.0062	0.260319	E	2.81818
GO:0030665	clathrin coated vesicle membrane	5	0.0022	1	0.0062	0.260319	E	2.81818
GO:0031980	mitochondrial lumen	5	0.0022	1	0.0062	0.260319	E	2.81818
GO:0005905	coated pit	5	0.0022	1	0.0062	0.260319	E	2.81818
GO:0030133	transport vesicle	5	0.0022	1	0.0062	0.260319	E	2.81818
GO:0030136	clathrin-coated vesicle	5	0.0022	1	0.0062	0.260319	E	2.81818
GO:0005759	mitochondrial matrix	5	0.0022	1	0.0062	0.260319	E	2.81818
GO:0030658	transport vesicle membrane	5	0.0022	1	0.0062	0.260319	E	2.81818
GO:0030532	small nuclear ribonucleoprotein complex	5	0.0022	1	0.0062	0.260319	E	2.81818
GO:0010926	anatomical structure formation	23	0.0097	2	0.0124	0.26822	E	1.27835
GO:0006007	glucose catabolic process	23	0.0097	2	0.0124	0.26822	E	1.27835
GO:0022607	cellular component assembly	23	0.0097	2	0.0124	0.26822	E	1.27835
GO:0046164	alcohol catabolic process	23	0.0097	2	0.0124	0.26822	E	1.27835
GO:0044275	cellular carbohydrate catabolic process	23	0.0097	2	0.0124	0.26822	E	1.27835
GO:0019320	hexose catabolic process	23	0.0097	2	0.0124	0.26822	E	1.27835
GO:0046365	monosaccharide catabolic process	23	0.0097	2	0.0124	0.26822	E	1.27835
GO:0016052	carbohydrate catabolic process	24	0.0101	2	0.0124	0.272739	E	1.22772
GO:0006006	glucose metabolic process	25	0.0106	2	0.0124	0.27632	E	1.16981
GO:0012505	endomembrane system	25	0.0108	2	0.0124	0.277811	E	1.14815
GO:0031981	nuclear lumen	25	0.0108	2	0.0124	0.277811	E	1.14815
GO:0007264	small GTPase mediated signal transduction	26	0.011	2	0.0124	0.279007	E	1.12727
GO:0042254	ribosome biogenesis	26	0.011	2	0.0124	0.279007	E	1.12727
GO:0019899	enzyme binding	6	0.0025	1	0.0063	0.279469	E	2.52
GO:0005083	small GTPase regulator activity	6	0.0025	1	0.0063	0.279469	E	2.52
GO:0005484	SNAP receptor activity	6	0.0025	1	0.0063	0.279469	E	2.52
GO:0005886	plasma membrane	26	0.0112	2	0.0124	0.280147	E	1.10714	C
GO:0022613	ribonucleoprotein complex biogenesis	27	0.0114	2	0.0124	0.280844	E	1.08772
GO:0006753	nucleoside phosphate metabolic process	29	0.0123	2	0.0124	0.28216	E	1.00813
GO:0009117	nucleotide metabolic process	29	0.0123	2	0.0124	0.28216	E	1.00813
GO:0006334	nucleosome assembly	6	0.0025	1	0.0062	0.287629	E	2.48
GO:0045291	nuclear mRNA trans splicing, SL addition	6	0.0025	1	0.0062	0.287629	E	2.48
GO:0046903	secretion	6	0.0025	1	0.0062	0.287629	E	2.48
GO:0065004	protein-DNA complex assembly	6	0.0025	1	0.0062	0.287629	E	2.48
GO:0006119	oxidative phosphorylation	6	0.0025	1	0.0062	0.287629	E	2.48
GO:0042401	biogenic amine biosynthetic process	6	0.0025	1	0.0062	0.287629	E	2.48
GO:0032940	secretion by cell	6	0.0025	1	0.0062	0.287629	E	2.48
GO:0034728	nucleosome organization	6	0.0025	1	0.0062	0.287629	E	2.48
GO:0042398	cellular amino acid derivative biosynthetic process	6	0.0025	1	0.0062	0.287629	E	2.48
GO:0006944	membrane fusion	6	0.0025	1	0.0062	0.287629	E	2.48
GO:0017038	protein import	6	0.0025	1	0.0062	0.287629	E	2.48
GO:0000365	nuclear mRNA trans splicing, via spliceosome	6	0.0025	1	0.0062	0.287629	E	2.48
GO:0005813	centrosome	6	0.0026	1	0.0062	0.29083	E	2.38462
GO:0008287	protein serine/threonine phosphatase complex	6	0.0026	1	0.0062	0.29083	E	2.38462
GO:0000178	exosome (RNase complex)	6	0.0026	1	0.0062	0.29083	E	2.38462
GO:0017069	snRNA binding	7	0.0029	1	0.0063	0.304903	E	2.17241
GO:0030695	GTPase regulator activity	7	0.0029	1	0.0063	0.304903	E	2.17241
GO:0019239	deaminase activity	7	0.0029	1	0.0063	0.304903	E	2.17241
GO:0034061	DNA polymerase activity	7	0.0029	1	0.0063	0.304903	E	2.17241
GO:0060589	nucleoside-triphosphatase regulator activity	7	0.0029	1	0.0063	0.304903	E	2.17241
GO:0003887	DNA-directed DNA polymerase activity	7	0.0029	1	0.0063	0.304903	E	2.17241
GO:0003746	translation elongation factor activity	7	0.0029	1	0.0063	0.304903	E	2.17241
GO:0034637	cellular carbohydrate biosynthetic process	7	0.003	1	0.0062	0.312808	E	2.06667
GO:0031497	chromatin assembly	7	0.003	1	0.0062	0.312808	E	2.06667
GO:0005798	Golgi-associated vesicle	7	0.003	1	0.0062	0.315881	E	2.06667
GO:0030118	clathrin coat	7	0.003	1	0.0062	0.315881	E	2.06667
GO:0030660	Golgi-associated vesicle membrane	7	0.003	1	0.0062	0.315881	E	2.06667
GO:0015037	peptide disulfide oxidoreductase activity	8	0.0033	1	0.0063	0.325854	E	1.90909
GO:0015038	glutathione disulfide oxidoreductase activity	8	0.0033	1	0.0063	0.325854	E	1.90909
GO:0004362	glutathione-disulfide reductase activity	8	0.0033	1	0.0063	0.325854	E	1.90909
GO:0016051	carbohydrate biosynthetic process	8	0.0034	1	0.0062	0.333237	E	1.82353
GO:0009141	nucleoside triphosphate metabolic process	8	0.0034	1	0.0062	0.333237	E	1.82353
GO:0009201	ribonucleoside triphosphate biosynthetic process	8	0.0034	1	0.0062	0.333237	E	1.82353
GO:0009199	ribonucleoside triphosphate metabolic process	8	0.0034	1	0.0062	0.333237	E	1.82353
GO:0006888	ER to Golgi vesicle-mediated transport	8	0.0034	1	0.0062	0.333237	E	1.82353
GO:0009142	nucleoside triphosphate biosynthetic process	8	0.0034	1	0.0062	0.333237	E	1.82353
GO:0006333	chromatin assembly or disassembly	8	0.0034	1	0.0062	0.333237	E	1.82353
GO:0030001	metal ion transport	8	0.0034	1	0.0062	0.333237	E	1.82353
GO:0006414	translational elongation	8	0.0034	1	0.0062	0.333237	E	1.82353
GO:0005832	chaperonin-containing T-complex	8	0.0034	1	0.0062	0.336078	E	1.82353
GO:0030120	vesicle coat	8	0.0034	1	0.0062	0.336078	E	1.82353
GO:0009898	internal side of plasma membrane	8	0.0034	1	0.0062	0.336078	E	1.82353
GO:0008092	cytoskeletal protein binding	9	0.0037	1	0.0063	0.342793	E	1.7027	F
GO:0016209	antioxidant activity	9	0.0037	1	0.0063	0.342793	E	1.7027	F
GO:0008565	protein transporter activity	9	0.0037	1	0.0063	0.342793	E	1.7027
GO:0016830	carbon-carbon lyase activity	9	0.0037	1	0.0063	0.342793	E	1.7027
GO:0055085	transmembrane transport	9	0.0038	1	0.0062	0.349443	E	1.63158
GO:0006270	DNA replication initiation	9	0.0038	1	0.0062	0.349443	E	1.63158
GO:0010324	membrane invagination	9	0.0038	1	0.0062	0.349443	E	1.63158
GO:0006897	endocytosis	9	0.0038	1	0.0062	0.349443	E	1.63158
GO:0000139	Golgi membrane	9	0.0039	1	0.0062	0.351968	E	1.58974
GO:0031202	RNA splicing factor activity, transesterification mechanism	10	0.0041	1	0.0063	0.35615	E	1.53659
GO:0048193	Golgi vesicle transport	10	0.0042	1	0.0062	0.361902	E	1.47619
GO:0005694	chromosome	10	0.0043	1	0.0062	0.364046	E	1.44186	C
GO:0030135	coated vesicle	10	0.0043	1	0.0062	0.364046	E	1.44186
GO:0044433	cytoplasmic vesicle part	10	0.0043	1	0.0062	0.364046	E	1.44186
GO:0030659	cytoplasmic vesicle membrane	10	0.0043	1	0.0062	0.364046	E	1.44186
GO:0009986	cell surface	10	0.0043	1	0.0062	0.364046	E	1.44186
GO:0048475	coated membrane	10	0.0043	1	0.0062	0.364046	E	1.44186
GO:0044427	chromosomal part	10	0.0043	1	0.0062	0.364046	E	1.44186
GO:0030117	membrane coat	10	0.0043	1	0.0062	0.364046	E	1.44186
GO:0030662	coated vesicle membrane	10	0.0043	1	0.0062	0.364046	E	1.44186
GO:0019201	nucleotide kinase activity	11	0.0045	1	0.0063	0.366318	E	1.4
GO:0016049	cell growth	11	0.0047	1	0.0062	0.371045	E	1.31915	P
GO:0070271	protein complex biogenesis	11	0.0047	1	0.0062	0.371045	E	1.31915
GO:0006576	biogenic amine metabolic process	11	0.0047	1	0.0062	0.371045	E	1.31915
GO:0006461	protein complex assembly	11	0.0047	1	0.0062	0.371045	E	1.31915
GO:0005783	endoplasmic reticulum	11	0.0047	1	0.0062	0.372762	E	1.31915	C
GO:0016023	cytoplasmic membrane-bounded vesicle	11	0.0047	1	0.0062	0.372762	E	1.31915	C
GO:0031410	cytoplasmic vesicle	11	0.0047	1	0.0062	0.372762	E	1.31915
GO:0012506	vesicle membrane	11	0.0047	1	0.0062	0.372762	E	1.31915
GO:0043190	ATP-binding cassette (ABC) transporter complex	11	0.0047	1	0.0062	0.372762	E	1.31915
GO:0015036	disulfide oxidoreductase activity	12	0.0049	1	0.0063	0.373651	E	1.28571
GO:0005200	structural constituent of cytoskeleton	12	0.0049	1	0.0063	0.373651	E	1.28571
GO:0016668	oxidoreductase activity, acting on sulfur group of donors, NAD or NADP as acceptor	12	0.0049	1	0.0063	0.373651	E	1.28571
GO:0006575	cellular amino acid derivative metabolic process	12	0.0051	1	0.0062	0.377264	E	1.21569
GO:0044271	nitrogen compound biosynthetic process	12	0.0051	1	0.0062	0.377264	E	1.21569
GO:0009309	amine biosynthetic process	12	0.0051	1	0.0062	0.377264	E	1.21569
GO:0008361	regulation of cell size	12	0.0051	1	0.0062	0.377264	E	1.21569
GO:0016776	phosphotransferase activity, phosphate group as acceptor	13	0.0054	1	0.0063	0.378473	E	1.16667
GO:0031982	vesicle	12	0.0052	1	0.0062	0.37852	E	1.19231
GO:0044431	Golgi apparatus part	12	0.0052	1	0.0062	0.37852	E	1.19231
GO:0031988	membrane-bounded vesicle	12	0.0052	1	0.0062	0.37852	E	1.19231
GO:0040007	growth	13	0.0055	1	0.0062	0.380912	E	1.12727	P
GO:0019205	nucleobase, nucleoside, nucleotide kinase activity	14	0.0058	1	0.0063	0.381078	E	1.08621
GO:0004527	exonuclease activity	14	0.0058	1	0.0063	0.381078	E	1.08621
GO:0009150	purine ribonucleotide metabolic process	14	0.0059	1	0.0062	0.382307	E	1.05085
GO:0009152	purine ribonucleotide biosynthetic process	14	0.0059	1	0.0062	0.382307	E	1.05085
GO:0043094	cellular metabolic compound salvage	14	0.0059	1	0.0062	0.382307	E	1.05085
GO:0006364	rRNA processing	14	0.0059	1	0.0062	0.382307	E	1.05085
GO:0015629	actin cytoskeleton	14	0.006	1	0.0062	0.382587	E	1.03333
GO:0006164	purine nucleotide biosynthetic process	15	0.0063	1	0.0062	0.381738	D	0.984127
GO:0006163	purine nucleotide metabolic process	15	0.0063	1	0.0062	0.381738	D	0.984127
GO:0034622	cellular macromolecular complex assembly	15	0.0063	1	0.0062	0.381738	D	0.984127
GO:0005794	Golgi apparatus	15	0.0065	1	0.0062	0.381522	D	0.953846	C
GO:0016072	rRNA metabolic process	16	0.0068	1	0.0062	0.379464	D	0.911765
GO:0016667	oxidoreductase activity, acting on sulfur group of donors	17	0.007	1	0.0063	0.378131	D	0.9
GO:0004842	ubiquitin-protein ligase activity	18	0.0074	1	0.0063	0.374292	D	0.851351
GO:0015980	energy derivation by oxidation of organic compounds	18	0.0076	1	0.0062	0.37071	D	0.815789
GO:0006325	establishment or maintenance of chromatin architecture	18	0.0076	1	0.0062	0.37071	D	0.815789
GO:0045333	cellular respiration	18	0.0076	1	0.0062	0.37071	D	0.815789
GO:0016829	lyase activity	19	0.0078	1	0.0063	0.369337	D	0.807692
GO:0019787	small conjugating protein ligase activity	19	0.0078	1	0.0063	0.369337	D	0.807692
GO:0009889	regulation of biosynthetic process	19	0.008	1	0.0062	0.364629	D	0.775
GO:0031326	regulation of cellular biosynthetic process	19	0.008	1	0.0062	0.364629	D	0.775
GO:0006351	transcription, DNA-dependent	20	0.0085	1	0.0062	0.357643	D	0.729412
GO:0032774	RNA biosynthetic process	21	0.0089	1	0.0062	0.349903	D	0.696629
GO:0005275	amine transmembrane transporter activity	22	0.0091	1	0.0063	0.34931	D	0.692308
GO:0034470	ncRNA processing	22	0.0093	1	0.0062	0.341544	D	0.666667
GO:0004722	protein serine/threonine phosphatase activity	23	0.0095	1	0.0063	0.341348	D	0.663158
GO:0016881	acid-amino acid ligase activity	24	0.0099	1	0.0063	0.332927	D	0.636364
GO:0007010	cytoskeleton organization	23	0.0097	1	0.0062	0.332685	D	0.639175	P
GO:0006865	amino acid transport	23	0.0097	1	0.0062	0.332685	D	0.639175
GO:0015837	amine transport	23	0.0097	1	0.0062	0.332685	D	0.639175
GO:0080090	regulation of primary metabolic process	23	0.0097	1	0.0062	0.332685	D	0.639175
GO:0031323	regulation of cellular metabolic process	23	0.0097	1	0.0062	0.332685	D	0.639175
GO:0008135	translation factor activity, nucleic acid binding	25	0.0103	1	0.0063	0.324141	D	0.61165	F
GO:0045182	translation regulator activity	25	0.0103	1	0.0063	0.324141	D	0.61165	F
GO:0015849	organic acid transport	25	0.0106	1	0.0062	0.313883	D	0.584906
GO:0046942	carboxylic acid transport	25	0.0106	1	0.0062	0.313883	D	0.584906
GO:0019222	regulation of metabolic process	25	0.0106	1	0.0062	0.313883	D	0.584906
GO:0065008	regulation of biological quality	27	0.0114	1	0.0062	0.294211	D	0.54386
GO:0044429	mitochondrial part	27	0.0116	1	0.0062	0.289477	D	0.534483
GO:0004518	nuclease activity	29	0.0119	1	0.0063	0.286873	D	0.529412	F
GO:0006812	cation transport	28	0.0118	1	0.0062	0.284228	D	0.525424
GO:0006260	DNA replication	30	0.0127	2	0.0124	0.281737	D	0.976378
GO:0019318	hexose metabolic process	30	0.0127	2	0.0124	0.281737	D	0.976378
GO:0005996	monosaccharide metabolic process	31	0.0131	2	0.0124	0.28066	D	0.946565
GO:0005509	calcium ion binding	35	0.0144	2	0.0127	0.275171	D	0.881944	F
GO:0019001	guanyl nucleotide binding	36	0.0148	2	0.0127	0.272355	D	0.858108
GO:0032561	guanyl ribonucleotide binding	36	0.0148	2	0.0127	0.272355	D	0.858108
GO:0005525	GTP binding	36	0.0148	2	0.0127	0.272355	D	0.858108
GO:0016071	mRNA metabolic process	35	0.0148	2	0.0124	0.270767	D	0.837838
GO:0016879	ligase activity, forming carbon-nitrogen bonds	31	0.0128	1	0.0063	0.26781	D	0.492188
GO:0006950	response to stress	38	0.0161	2	0.0124	0.258765	D	0.770186	P
GO:0006470	protein amino acid dephosphorylation	31	0.0131	1	0.0062	0.254348	D	0.473282
GO:0006066	cellular alcohol metabolic process	40	0.0169	2	0.0124	0.249205	D	0.733728
GO:0006811	ion transport	32	0.0135	1	0.0062	0.244554	D	0.459259	P
GO:0034984	cellular response to DNA damage stimulus	32	0.0135	1	0.0062	0.244554	D	0.459259
GO:0006974	response to DNA damage stimulus	32	0.0135	1	0.0062	0.244554	D	0.459259
GO:0051716	cellular response to stimulus	33	0.014	1	0.0062	0.234901	D	0.442857
GO:0033554	cellular response to stress	33	0.014	1	0.0062	0.234901	D	0.442857
GO:0055086	nucleobase, nucleoside and nucleotide metabolic process	49	0.0207	3	0.0186	0.22899	D	0.898551
GO:0004721	phosphoprotein phosphatase activity	36	0.0148	1	0.0063	0.221552	D	0.425676	F
GO:0042626	ATPase activity, coupled to transmembrane movement of substances	36	0.0148	1	0.0063	0.221552	D	0.425676
GO:0043492	ATPase activity, coupled to movement of substances	36	0.0148	1	0.0063	0.221552	D	0.425676
GO:0016820	hydrolase activity, acting on acid anhydrides, catalyzing transmembrane movement of substances	37	0.0152	1	0.0063	0.212755	D	0.414474
GO:0050896	response to stimulus	47	0.0199	2	0.0124	0.210207	D	0.623116
GO:0005829	cytosol	47	0.0202	2	0.0124	0.205322	D	0.613861	C
GO:0008610	lipid biosynthetic process	48	0.0203	2	0.0124	0.204301	D	0.610837
GO:0015405	P-P-bond-hydrolysis-driven transmembrane transporter activity	38	0.0157	1	0.0063	0.204151	D	0.401274
GO:0015399	primary active transmembrane transporter activity	38	0.0157	1	0.0063	0.204151	D	0.401274
GO:0003677	DNA binding	66	0.0272	4	0.0253	0.20183	D	0.930147	F
GO:0044445	cytosolic part	38	0.0164	1	0.0062	0.183794	D	0.378049
GO:0016311	dephosphorylation	39	0.0165	1	0.0062	0.181141	D	0.375758
GO:0042623	ATPase activity, coupled	86	0.0354	5	0.0316	0.177123	D	0.892655
GO:0006629	lipid metabolic process	67	0.0283	3	0.0186	0.166086	D	0.657244	P
GO:0031090	organelle membrane	54	0.0232	2	0.0124	0.16364	D	0.534483
GO:0065007	biological regulation	104	0.044	7	0.0435	0.157663	D	0.988636
GO:0019752	carboxylic acid metabolic process	70	0.0296	3	0.0186	0.153252	D	0.628378	P
GO:0006082	organic acid metabolic process	70	0.0296	3	0.0186	0.153252	D	0.628378
GO:0016887	ATPase activity	109	0.0449	6	0.038	0.15254	D	0.846325
GO:0003735	structural constituent of ribosome	99	0.0408	5	0.0316	0.150729	D	0.77451
GO:0044255	cellular lipid metabolic process	59	0.0249	2	0.0124	0.141523	D	0.497992
GO:0005198	structural molecule activity	117	0.0482	6	0.038	0.136822	D	0.788382	F
GO:0005840	ribosome	99	0.0426	5	0.0311	0.134382	D	0.730047	C
GO:0006412	translation	150	0.0634	9	0.0559	0.128452	D	0.881703	P
GO:0006396	RNA processing	117	0.0495	6	0.0373	0.125025	D	0.753535
GO:0016773	phosphotransferase activity, alcohol group as acceptor	185	0.0762	12	0.0759	0.123013	D	0.996063
GO:0043687	post-translational protein modification	202	0.0854	13	0.0807	0.115693	D	0.944965
GO:0022804	active transmembrane transporter activity	68	0.028	2	0.0127	0.112031	D	0.453571
GO:0006793	phosphorus metabolic process	217	0.0918	14	0.087	0.111951	D	0.947712
GO:0006796	phosphate metabolic process	217	0.0918	14	0.087	0.111951	D	0.947712
GO:0003676	nucleic acid binding	232	0.0956	14	0.0886	0.109111	D	0.926778	F
GO:0034645	cellular macromolecule biosynthetic process	239	0.1011	16	0.0994	0.107942	D	0.983185
GO:0009059	macromolecule biosynthetic process	240	0.1015	16	0.0994	0.107764	D	0.97931
GO:0044249	cellular biosynthetic process	292	0.1235	19	0.118	0.0979782	D	0.955466
GO:0009058	biosynthetic process	301	0.1273	19	0.118	0.0936797	D	0.926944	P
GO:0043412	biopolymer modification	280	0.1184	17	0.1056	0.0913827	D	0.891892
GO:0010467	gene expression	307	0.1298	19	0.118	0.0898601	D	0.909091
GO:0044444	cytoplasmic part	362	0.1558	25	0.1553	0.0896537	D	0.996791
GO:0006139	nucleobase, nucleoside, nucleotide and nucleic acid metabolic process	368	0.1556	25	0.1553	0.0896067	D	0.998072	P
GO:0016740	transferase activity	342	0.1409	20	0.1266	0.0845796	D	0.89851	F
GO:0005737	cytoplasm	419	0.1803	29	0.1801	0.0845481	D	0.998891	C
GO:0006464	protein modification process	253	0.107	14	0.087	0.0778815	D	0.813084	P
GO:0044267	cellular protein metabolic process	540	0.2283	36	0.2236	0.0770798	D	0.979413
GO:0006259	DNA metabolic process	74	0.0313	2	0.0124	0.0762471	D	0.396166	P
GO:0016791	phosphatase activity	59	0.0243	1	0.0063	0.0755714	D	0.259259
GO:0019538	protein metabolic process	596	0.252	40	0.2484	0.0747388	D	0.985714	P
GO:0044260	cellular macromolecule metabolic process	823	0.348	55	0.3416	0.0674751	D	0.981609
GO:0034960	cellular biopolymer metabolic process	800	0.3383	53	0.3292	0.0669765	D	0.973101
GO:0043170	macromolecule metabolic process	882	0.3729	59	0.3665	0.0664201	D	0.982837
GO:0043283	biopolymer metabolic process	857	0.3624	57	0.354	0.0662151	D	0.976821
GO:0022892	substrate-specific transporter activity	82	0.0338	2	0.0127	0.0624991	D	0.37574
GO:0046914	transition metal ion binding	63	0.026	1	0.0063	0.0613191	D	0.242308
GO:0003824	catalytic activity	1017	0.419	63	0.3987	0.0579405	D	0.951551	F
GO:0044238	primary metabolic process	1049	0.4436	68	0.4224	0.0562085	D	0.952209	P
GO:0042578	phosphoric ester hydrolase activity	68	0.028	1	0.0063	0.0469254	D	0.225
GO:0005739	mitochondrion	152	0.0654	6	0.0373	0.0455887	D	0.570336	C
GO:0043167	ion binding	111	0.0457	3	0.019	0.0404246	D	0.415755
GO:0046872	metal ion binding	111	0.0457	3	0.019	0.0404246	D	0.415755
GO:0043169	cation binding	111	0.0457	3	0.019	0.0404246	D	0.415755
GO:0022891	substrate-specific transmembrane transporter activity	73	0.0301	1	0.0063	0.0356892	D	0.209302
GO:0044237	cellular metabolic process	1042	0.4406	64	0.3975	0.0344759	D	0.902179
GO:0022857	transmembrane transporter activity	99	0.0408	2	0.0127	0.0282086	D	0.311275
GO:0005215	transporter activity	120	0.0494	3	0.019	0.0274078	D	0.384615	F
GO:0016491	oxidoreductase activity	106	0.0437	2	0.0127	0.0199009	D	0.290618	F
GO:0008152	metabolic process	1173	0.496	69	0.4286	0.0135908	D	0.864113	P
GO:0016788	hydrolase activity, acting on ester bonds	119	0.049	2	0.0127	0.0101374	D	0.259184
GO:0016021	integral to membrane	237	0.102	8	0.0497	0.0066807	D	0.487255	C
GO:0031224	intrinsic to membrane	237	0.102	8	0.0497	0.0066807	D	0.487255

## Sheet: 1-1-0-0
GO ID	GO Term	NB_IN_REF	FREQ_IN_REF	NB_IN_SET	FREQ_IN_SET	P-value	ENRICHMENT/DEPLETION	Ratio: F/D	Category
GO:0017150	tRNA dihydrouridine synthase activity	2	0.0008	2	0.0282	0.0008441	E	35.25			1-1-0-0 profile: Significant loss-of-fitness in PF only
GO:0050660	FAD binding	2	0.0008	2	0.0282	0.0008441	E	35.25
GO:0016627	oxidoreductase activity, acting on the CH-CH group of donors	9	0.0037	3	0.0423	0.0017006	E	11.4324
GO:0016020	membrane	353	0.1519	20	0.2778	0.00226	E	1.82883
GO:0050662	coenzyme binding	3	0.0012	2	0.0282	0.0024603	E	23.5
GO:0048037	cofactor binding	3	0.0012	2	0.0282	0.0024603	E	23.5
GO:0006732	coenzyme metabolic process	25	0.0106	4	0.0563	0.005151	E	5.31132			GO slim set
GO:0051186	cofactor metabolic process	27	0.0114	4	0.0563	0.0067428	E	4.9386
GO:0016747	transferase activity, transferring acyl groups other than amino-acyl groups	28	0.0115	4	0.0563	0.0070152	E	4.89565			Categories:
GO:0008415	acyltransferase activity	28	0.0115	4	0.0563	0.0070152	E	4.89565			P:Biological Process
GO:0016746	transferase activity, transferring acyl groups	28	0.0115	4	0.0563	0.0070152	E	4.89565			C:Cellular Component
GO:0006400	tRNA modification	5	0.0021	2	0.0282	0.008133	E	13.4286			F:Molecular Function
GO:0009108	coenzyme biosynthetic process	6	0.0025	2	0.0282	0.0118428	E	11.28
GO:0016021	integral to membrane	237	0.102	13	0.1806	0.0152381	E	1.77059	C
GO:0031224	intrinsic to membrane	237	0.102	13	0.1806	0.0152381	E	1.77059
GO:0044425	membrane part	265	0.114	14	0.1944	0.0159538	E	1.70526
GO:0051188	cofactor biosynthetic process	7	0.003	2	0.0282	0.016095	E	9.4
GO:0008033	tRNA processing	8	0.0034	2	0.0282	0.020832	E	8.29412
GO:0016491	oxidoreductase activity	106	0.0437	7	0.0986	0.0221151	E	2.25629	F
GO:0006810	transport	209	0.0884	11	0.1549	0.0246418	E	1.75226	P
GO:0051234	establishment of localization	210	0.0888	11	0.1549	0.0252802	E	1.74437
GO:0022610	biological adhesion	9	0.0038	2	0.0282	0.0259999	E	7.42105
GO:0007155	cell adhesion	9	0.0038	2	0.0282	0.0259999	E	7.42105
GO:0015562	efflux transmembrane transporter activity	1	0.0004	1	0.0141	0.0292542	E	35.25
GO:0004683	calmodulin-dependent protein kinase activity	1	0.0004	1	0.0141	0.0292542	E	35.25
GO:0008425	2-polyprenyl-6-methoxy-1,4-benzoquinone methyltransferase activity	1	0.0004	1	0.0141	0.0292542	E	35.25
GO:0016878	acid-thiol ligase activity	1	0.0004	1	0.0141	0.0292542	E	35.25
GO:0030580	quinone cofactor methyltransferase activity	1	0.0004	1	0.0141	0.0292542	E	35.25
GO:0016405	CoA-ligase activity	1	0.0004	1	0.0141	0.0292542	E	35.25
GO:0004776	succinate-CoA ligase (GDP-forming) activity	1	0.0004	1	0.0141	0.0292542	E	35.25
GO:0004686	elongation factor-2 kinase activity	1	0.0004	1	0.0141	0.0292542	E	35.25
GO:0008169	C-methyltransferase activity	1	0.0004	1	0.0141	0.0292542	E	35.25
GO:0016156	fumarate reductase (NADH) activity	1	0.0004	1	0.0141	0.0292542	E	35.25
GO:0004774	succinate-CoA ligase activity	1	0.0004	1	0.0141	0.0292542	E	35.25
GO:0004801	transaldolase activity	1	0.0004	1	0.0141	0.0292542	E	35.25
GO:0004738	pyruvate dehydrogenase activity	1	0.0004	1	0.0141	0.0292542	E	35.25
GO:0006474	N-terminal protein amino acid acetylation	1	0.0004	1	0.0141	0.0300211	E	35.25
GO:0006085	acetyl-CoA biosynthetic process	1	0.0004	1	0.0141	0.0300211	E	35.25
GO:0042273	ribosomal large subunit biogenesis	1	0.0004	1	0.0141	0.0300211	E	35.25
GO:0031365	N-terminal protein amino acid modification	1	0.0004	1	0.0141	0.0300211	E	35.25
GO:0018409	peptide or protein amino-terminal blocking	1	0.0004	1	0.0141	0.0300211	E	35.25
GO:0000027	ribosomal large subunit assembly	1	0.0004	1	0.0141	0.0300211	E	35.25
GO:0006086	acetyl-CoA biosynthetic process from pyruvate	1	0.0004	1	0.0141	0.0300211	E	35.25
GO:0042257	ribosomal subunit assembly	1	0.0004	1	0.0141	0.0300211	E	35.25
GO:0005967	mitochondrial pyruvate dehydrogenase complex	1	0.0004	1	0.0139	0.0309811	E	34.75
GO:0006084	acetyl-CoA metabolic process	10	0.0042	2	0.0282	0.0315481	E	6.71429
GO:0051179	localization	223	0.0943	11	0.1549	0.0344113	E	1.64263
GO:0016192	vesicle-mediated transport	46	0.0195	4	0.0563	0.0360067	E	2.88718
GO:0044429	mitochondrial part	27	0.0116	3	0.0417	0.0403192	E	3.59483
GO:0004222	metalloendopeptidase activity	13	0.0054	2	0.0282	0.0478961	E	5.22222
GO:0006733	oxidoreduction coenzyme metabolic process	13	0.0055	2	0.0282	0.0500143	E	5.12727
GO:0005739	mitochondrion	152	0.0654	8	0.1111	0.0521218	E	1.69878	C
GO:0004536	deoxyribonuclease activity	2	0.0008	1	0.0141	0.0568202	E	17.625
GO:0004742	dihydrolipoyllysine-residue acetyltransferase activity	2	0.0008	1	0.0141	0.0568202	E	17.625
GO:0016418	S-acetyltransferase activity	2	0.0008	1	0.0141	0.0568202	E	17.625
GO:0003999	adenine phosphoribosyltransferase activity	2	0.0008	1	0.0141	0.0568202	E	17.625
GO:0016744	transferase activity, transferring aldehyde or ketonic groups	2	0.0008	1	0.0141	0.0568202	E	17.625
GO:0030523	dihydrolipoamide S-acyltransferase activity	2	0.0008	1	0.0141	0.0568202	E	17.625
GO:0016877	ligase activity, forming carbon-sulfur bonds	2	0.0008	1	0.0141	0.0568202	E	17.625
GO:0016628	oxidoreductase activity, acting on the CH-CH group of donors, NAD or NADP as acceptor	2	0.0008	1	0.0141	0.0568202	E	17.625
GO:0016417	S-acyltransferase activity	2	0.0008	1	0.0141	0.0568202	E	17.625
GO:0042255	ribosome assembly	2	0.0008	1	0.0141	0.0582644	E	17.625
GO:0045254	pyruvate dehydrogenase complex	2	0.0009	1	0.0139	0.0600683	E	15.4444
GO:0016407	acetyltransferase activity	15	0.0062	2	0.0282	0.0608416	E	4.54839
GO:0003824	catalytic activity	1017	0.419	33	0.4648	0.0703188	E	1.10931	F
GO:0003993	acid phosphatase activity	3	0.0012	1	0.0141	0.0827701	E	11.75
GO:0019843	rRNA binding	3	0.0012	1	0.0141	0.0827701	E	11.75
GO:0004725	protein tyrosine phosphatase activity	3	0.0012	1	0.0141	0.0827701	E	11.75
GO:0016721	oxidoreductase activity, acting on superoxide radicals as acceptor	3	0.0012	1	0.0141	0.0827701	E	11.75
GO:0004784	superoxide dismutase activity	3	0.0012	1	0.0141	0.0827701	E	11.75
GO:0005623	cell	998	0.4294	33	0.4583	0.0842314	E	1.0673	C
GO:0044464	cell part	998	0.4294	33	0.4583	0.0842314	E	1.0673
GO:0006801	superoxide metabolic process	3	0.0013	1	0.0141	0.0848076	E	10.8462
GO:0018193	peptidyl-amino acid modification	3	0.0013	1	0.0141	0.0848076	E	10.8462
GO:0006473	protein amino acid acetylation	3	0.0013	1	0.0141	0.0848076	E	10.8462
GO:0043543	protein amino acid acylation	3	0.0013	1	0.0141	0.0848076	E	10.8462
GO:0022618	ribonucleoprotein complex assembly	3	0.0013	1	0.0141	0.0848076	E	10.8462
GO:0008352	katanin complex	3	0.0013	1	0.0139	0.0873474	E	10.6923
GO:0044450	microtubule organizing center part	3	0.0013	1	0.0139	0.0873474	E	10.6923
GO:0008237	metallopeptidase activity	19	0.0078	2	0.0282	0.0882177	E	3.61538
GO:0016740	transferase activity	342	0.1409	12	0.169	0.101724	E	1.19943	F
GO:0022891	substrate-specific transmembrane transporter activity	73	0.0301	4	0.0563	0.102998	E	1.87043
GO:0005740	mitochondrial envelope	20	0.0086	2	0.0278	0.103485	E	3.23256
GO:0031966	mitochondrial membrane	20	0.0086	2	0.0278	0.103485	E	3.23256
GO:0005743	mitochondrial inner membrane	20	0.0086	2	0.0278	0.103485	E	3.23256
GO:0032787	monocarboxylic acid metabolic process	21	0.0089	2	0.0282	0.106075	E	3.16854
GO:0004312	fatty-acid synthase activity	4	0.0016	1	0.0141	0.107173	E	8.8125
GO:0005275	amine transmembrane transporter activity	22	0.0091	2	0.0282	0.109214	E	3.0989
GO:0046034	ATP metabolic process	4	0.0017	1	0.0141	0.109726	E	8.29412
GO:0006090	pyruvate metabolic process	4	0.0017	1	0.0141	0.109726	E	8.29412
GO:0006800	oxygen and reactive oxygen species metabolic process	4	0.0017	1	0.0141	0.109726	E	8.29412
GO:0015986	ATP synthesis coupled proton transport	4	0.0017	1	0.0141	0.109726	E	8.29412
GO:0006754	ATP biosynthetic process	4	0.0017	1	0.0141	0.109726	E	8.29412
GO:0034220	ion transmembrane transport	4	0.0017	1	0.0141	0.109726	E	8.29412
GO:0015985	energy coupled proton transport, down electrochemical gradient	4	0.0017	1	0.0141	0.109726	E	8.29412
GO:0019866	organelle inner membrane	21	0.009	2	0.0278	0.110903	E	3.08889
GO:0005663	DNA replication factor C complex	4	0.0017	1	0.0139	0.112901	E	8.17647
GO:0005765	lysosomal membrane	4	0.0017	1	0.0139	0.112901	E	8.17647
GO:0034470	ncRNA processing	22	0.0093	2	0.0282	0.113247	E	3.03226
GO:0015837	amine transport	23	0.0097	2	0.0282	0.12038	E	2.90722
GO:0006865	amino acid transport	23	0.0097	2	0.0282	0.12038	E	2.90722
GO:0017076	purine nucleotide binding	337	0.1389	11	0.1549	0.122225	E	1.11519
GO:0016787	hydrolase activity	434	0.1788	13	0.1831	0.122901	E	1.02405	F
GO:0055086	nucleobase, nucleoside and nucleotide metabolic process	49	0.0207	3	0.0423	0.123127	E	2.04348
GO:0044444	cytoplasmic part	362	0.1558	12	0.1667	0.123226	E	1.06996
GO:0005737	cytoplasm	419	0.1803	13	0.1806	0.123343	E	1.00166	C
GO:0000166	nucleotide binding	340	0.1401	11	0.1549	0.123643	E	1.10564	F
GO:0031975	envelope	23	0.0099	2	0.0278	0.125611	E	2.80808
GO:0031967	organelle envelope	23	0.0099	2	0.0278	0.125611	E	2.80808
GO:0009451	RNA modification	24	0.0101	2	0.0282	0.127454	E	2.79208
GO:0022892	substrate-specific transporter activity	82	0.0338	4	0.0563	0.127578	E	1.66568
GO:0046961	proton-transporting ATPase activity, rotational mechanism	5	0.0021	1	0.0141	0.130096	E	6.71429
GO:0051087	chaperone binding	5	0.0021	1	0.0141	0.130096	E	6.71429
GO:0006743	ubiquinone metabolic process	5	0.0021	1	0.0141	0.133091	E	6.71429
GO:0042375	quinone cofactor metabolic process	5	0.0021	1	0.0141	0.133091	E	6.71429
GO:0046942	carboxylic acid transport	25	0.0106	2	0.0282	0.134454	E	2.66038
GO:0015849	organic acid transport	25	0.0106	2	0.0282	0.134454	E	2.66038
GO:0005764	lysosome	5	0.0022	1	0.0139	0.136807	E	6.31818	C
GO:0000323	lytic vacuole	5	0.0022	1	0.0139	0.136807	E	6.31818
GO:0031980	mitochondrial lumen	5	0.0022	1	0.0139	0.136807	E	6.31818
GO:0005759	mitochondrial matrix	5	0.0022	1	0.0139	0.136807	E	6.31818
GO:0005657	replication fork	5	0.0022	1	0.0139	0.136807	E	6.31818
GO:0005215	transporter activity	120	0.0494	5	0.0704	0.136904	E	1.4251	F
GO:0007264	small GTPase mediated signal transduction	26	0.011	2	0.0282	0.141364	E	2.56364
GO:0030554	adenyl nucleotide binding	302	0.1244	9	0.1268	0.142854	E	1.01929
GO:0008324	cation transmembrane transporter activity	27	0.0111	2	0.0282	0.143452	E	2.54054
GO:0006399	tRNA metabolic process	27	0.0114	2	0.0282	0.148169	E	2.47368
GO:0065008	regulation of biological quality	27	0.0114	2	0.0282	0.148169	E	2.47368
GO:0008270	zinc ion binding	57	0.0235	3	0.0423	0.148593	E	1.8	F
GO:0031090	organelle membrane	54	0.0232	3	0.0417	0.149348	E	1.79741
GO:0004437	inositol or phosphatidylinositol phosphatase activity	6	0.0025	1	0.0141	0.151603	E	5.64
GO:0006812	cation transport	28	0.0118	2	0.0282	0.154857	E	2.38983
GO:0009144	purine nucleoside triphosphate metabolic process	6	0.0025	1	0.0141	0.154972	E	5.64
GO:0009145	purine nucleoside triphosphate biosynthetic process	6	0.0025	1	0.0141	0.154972	E	5.64
GO:0009206	purine ribonucleoside triphosphate biosynthetic process	6	0.0025	1	0.0141	0.154972	E	5.64
GO:0009205	purine ribonucleoside triphosphate metabolic process	6	0.0025	1	0.0141	0.154972	E	5.64
GO:0006119	oxidative phosphorylation	6	0.0025	1	0.0141	0.154972	E	5.64
GO:0016791	phosphatase activity	59	0.0243	3	0.0423	0.155753	E	1.74074
GO:0005813	centrosome	6	0.0026	1	0.0139	0.159142	E	5.34615
GO:0006753	nucleoside phosphate metabolic process	29	0.0123	2	0.0282	0.161417	E	2.29268
GO:0009117	nucleotide metabolic process	29	0.0123	2	0.0282	0.161417	E	2.29268
GO:0022857	transmembrane transporter activity	99	0.0408	4	0.0563	0.167457	E	1.3799
GO:0006457	protein folding	97	0.041	4	0.0563	0.168587	E	1.37317
GO:0046914	transition metal ion binding	63	0.026	3	0.0423	0.169315	E	1.62692
GO:0019829	cation-transporting ATPase activity	7	0.0029	1	0.0141	0.171757	E	4.86207
GO:0003746	translation elongation factor activity	7	0.0029	1	0.0141	0.171757	E	4.86207
GO:0009056	catabolic process	141	0.0596	5	0.0704	0.172324	E	1.18121	P
GO:0070013	intracellular organelle lumen	30	0.0129	2	0.0278	0.173921	E	2.15504
GO:0043233	organelle lumen	30	0.0129	2	0.0278	0.173921	E	2.15504
GO:0031974	membrane-enclosed lumen	30	0.0129	2	0.0278	0.173921	E	2.15504
GO:0006769	nicotinamide metabolic process	7	0.003	1	0.0141	0.175435	E	4.7
GO:0006740	NADPH regeneration	7	0.003	1	0.0141	0.175435	E	4.7
GO:0006098	pentose-phosphate shunt	7	0.003	1	0.0141	0.175435	E	4.7
GO:0016197	endosome transport	7	0.003	1	0.0141	0.175435	E	4.7
GO:0006739	NADP metabolic process	7	0.003	1	0.0141	0.175435	E	4.7
GO:0006811	ion transport	32	0.0135	2	0.0282	0.180229	E	2.08889	P
GO:0065007	biological regulation	104	0.044	4	0.0563	0.181317	E	1.27955
GO:0022804	active transmembrane transporter activity	68	0.028	3	0.0423	0.184642	E	1.51071
GO:0042578	phosphoric ester hydrolase activity	68	0.028	3	0.0423	0.184642	E	1.51071
GO:0016887	ATPase activity	109	0.0449	4	0.0563	0.184699	E	1.2539
GO:0007242	intracellular signaling cascade	33	0.014	2	0.0282	0.186183	E	2.01429
GO:0046872	metal ion binding	111	0.0457	4	0.0563	0.187503	E	1.23195
GO:0043169	cation binding	111	0.0457	4	0.0563	0.187503	E	1.23195
GO:0043167	ion binding	111	0.0457	4	0.0563	0.187503	E	1.23195
GO:0016763	transferase activity, transferring pentosyl groups	8	0.0033	1	0.0141	0.190615	E	4.27273
GO:0009199	ribonucleoside triphosphate metabolic process	8	0.0034	1	0.0141	0.194545	E	4.14706
GO:0009141	nucleoside triphosphate metabolic process	8	0.0034	1	0.0141	0.194545	E	4.14706
GO:0009142	nucleoside triphosphate biosynthetic process	8	0.0034	1	0.0141	0.194545	E	4.14706
GO:0019362	pyridine nucleotide metabolic process	8	0.0034	1	0.0141	0.194545	E	4.14706
GO:0006414	translational elongation	8	0.0034	1	0.0141	0.194545	E	4.14706
GO:0009201	ribonucleoside triphosphate biosynthetic process	8	0.0034	1	0.0141	0.194545	E	4.14706
GO:0016788	hydrolase activity, acting on ester bonds	119	0.049	4	0.0563	0.196502	E	1.14898
GO:0009057	macromolecule catabolic process	117	0.0495	4	0.0563	0.197516	E	1.13737
GO:0032561	guanyl ribonucleotide binding	36	0.0148	2	0.0282	0.197937	E	1.90541
GO:0019001	guanyl nucleotide binding	36	0.0148	2	0.0282	0.197937	E	1.90541
GO:0005525	GTP binding	36	0.0148	2	0.0282	0.197937	E	1.90541
GO:0005774	vacuolar membrane	8	0.0034	1	0.0139	0.199387	E	4.08824
GO:0044437	vacuolar part	8	0.0034	1	0.0139	0.199387	E	4.08824
GO:0016903	oxidoreductase activity, acting on the aldehyde or oxo group of donors	9	0.0037	1	0.0141	0.208237	E	3.81081
GO:0015075	ion transmembrane transporter activity	38	0.0157	2	0.0282	0.208306	E	1.79618
GO:0060249	anatomical structure homeostasis	9	0.0038	1	0.0141	0.212364	E	3.71053
GO:0043101	purine salvage	9	0.0038	1	0.0141	0.212364	E	3.71053
GO:0046356	acetyl-CoA catabolic process	9	0.0038	1	0.0141	0.212364	E	3.71053
GO:0046128	purine ribonucleoside metabolic process	9	0.0038	1	0.0141	0.212364	E	3.71053
GO:0000723	telomere maintenance	9	0.0038	1	0.0141	0.212364	E	3.71053
GO:0032200	telomere organization	9	0.0038	1	0.0141	0.212364	E	3.71053
GO:0006766	vitamin metabolic process	9	0.0038	1	0.0141	0.212364	E	3.71053
GO:0006897	endocytosis	9	0.0038	1	0.0141	0.212364	E	3.71053
GO:0055085	transmembrane transport	9	0.0038	1	0.0141	0.212364	E	3.71053
GO:0010324	membrane invagination	9	0.0038	1	0.0141	0.212364	E	3.71053
GO:0006767	water-soluble vitamin metabolic process	9	0.0038	1	0.0141	0.212364	E	3.71053
GO:0009109	coenzyme catabolic process	9	0.0038	1	0.0141	0.212364	E	3.71053
GO:0043174	nucleoside salvage	9	0.0038	1	0.0141	0.212364	E	3.71053
GO:0051187	cofactor catabolic process	9	0.0038	1	0.0141	0.212364	E	3.71053
GO:0006099	tricarboxylic acid cycle	9	0.0038	1	0.0141	0.212364	E	3.71053
GO:0042278	purine nucleoside metabolic process	9	0.0038	1	0.0141	0.212364	E	3.71053
GO:0006166	purine ribonucleoside salvage	9	0.0038	1	0.0141	0.212364	E	3.71053
GO:0005773	vacuole	9	0.0039	1	0.0139	0.217434	E	3.5641	C
GO:0042623	ATPase activity, coupled	86	0.0354	3	0.0423	0.222283	E	1.19492
GO:0007165	signal transduction	40	0.0169	2	0.0282	0.222829	E	1.66864	P
GO:0016410	N-acyltransferase activity	10	0.0041	1	0.0141	0.224676	E	3.43902
GO:0008080	N-acetyltransferase activity	10	0.0041	1	0.0141	0.224676	E	3.43902
GO:0007154	cell communication	41	0.0173	2	0.0282	0.227304	E	1.63006	P
GO:0006508	proteolysis	89	0.0376	3	0.0423	0.228057	E	1.125
GO:0030163	protein catabolic process	90	0.0381	3	0.0423	0.228873	E	1.11024
GO:0046394	carboxylic acid biosynthetic process	10	0.0042	1	0.0141	0.228949	E	3.35714
GO:0016053	organic acid biosynthetic process	10	0.0042	1	0.0141	0.228949	E	3.35714
GO:0006633	fatty acid biosynthetic process	10	0.0042	1	0.0141	0.228949	E	3.35714
GO:0006310	DNA recombination	10	0.0042	1	0.0141	0.228949	E	3.35714
GO:0009119	ribonucleoside metabolic process	10	0.0042	1	0.0141	0.228949	E	3.35714
GO:0043285	biopolymer catabolic process	94	0.0397	3	0.0423	0.231273	E	1.06549
GO:0006091	generation of precursor metabolites and energy	42	0.0178	2	0.0282	0.231583	E	1.58427	P
GO:0005694	chromosome	10	0.0043	1	0.0139	0.234183	E	3.23256	C
GO:0044427	chromosomal part	10	0.0043	1	0.0139	0.234183	E	3.23256
GO:0034660	ncRNA metabolic process	43	0.0182	2	0.0282	0.235666	E	1.54945
GO:0003678	DNA helicase activity	11	0.0045	1	0.0141	0.239986	E	3.13333
GO:0016049	cell growth	11	0.0047	1	0.0141	0.244358	E	3	P
GO:0016469	proton-transporting two-sector ATPase complex	11	0.0047	1	0.0139	0.249698	E	2.95745
GO:0015036	disulfide oxidoreductase activity	12	0.0049	1	0.0141	0.254218	E	2.87755
GO:0008361	regulation of cell size	12	0.0051	1	0.0141	0.258645	E	2.76471
GO:0009116	nucleoside metabolic process	12	0.0051	1	0.0141	0.258645	E	2.76471
GO:0005730	nucleolus	12	0.0052	1	0.0139	0.264036	E	2.67308	C
GO:0005815	microtubule organizing center	12	0.0052	1	0.0139	0.264036	E	2.67308	C
GO:0051082	unfolded protein binding	55	0.0227	2	0.0282	0.266904	E	1.24229
GO:0004386	helicase activity	55	0.0227	2	0.0282	0.266904	E	1.24229
GO:0004175	endopeptidase activity	57	0.0235	2	0.0282	0.270405	E	1.2
GO:0040007	growth	13	0.0055	1	0.0141	0.271863	E	2.56364	P
GO:0003677	DNA binding	66	0.0272	2	0.0282	0.278436	E	1.03676	F
GO:0015077	monovalent inorganic cation transmembrane transporter activity	14	0.0058	1	0.0141	0.27964	E	2.43103
GO:0015078	hydrogen ion transmembrane transporter activity	14	0.0058	1	0.0141	0.27964	E	2.43103
GO:0009150	purine ribonucleotide metabolic process	14	0.0059	1	0.0141	0.284062	E	2.38983
GO:0042592	homeostatic process	14	0.0059	1	0.0141	0.284062	E	2.38983
GO:0043094	cellular metabolic compound salvage	14	0.0059	1	0.0141	0.284062	E	2.38983
GO:0009152	purine ribonucleotide biosynthetic process	14	0.0059	1	0.0141	0.284062	E	2.38983
GO:0015992	proton transport	15	0.0063	1	0.0141	0.295291	E	2.2381
GO:0006818	hydrogen transport	15	0.0063	1	0.0141	0.295291	E	2.2381
GO:0006163	purine nucleotide metabolic process	15	0.0063	1	0.0141	0.295291	E	2.2381
GO:0034622	cellular macromolecular complex assembly	15	0.0063	1	0.0141	0.295291	E	2.2381
GO:0006164	purine nucleotide biosynthetic process	15	0.0063	1	0.0141	0.295291	E	2.2381
GO:0006631	fatty acid metabolic process	16	0.0068	1	0.0141	0.305594	E	2.07353
GO:0009060	aerobic respiration	16	0.0068	1	0.0141	0.305594	E	2.07353
GO:0016667	oxidoreductase activity, acting on sulfur group of donors	17	0.007	1	0.0141	0.310848	E	2.01429
GO:0022890	inorganic cation transmembrane transporter activity	17	0.007	1	0.0141	0.310848	E	2.01429
GO:0015672	monovalent inorganic cation transport	17	0.0072	1	0.0141	0.315018	E	1.95833
GO:0016044	membrane organization	17	0.0072	1	0.0141	0.315018	E	1.95833
GO:0009259	ribonucleotide metabolic process	17	0.0072	1	0.0141	0.315018	E	1.95833
GO:0009260	ribonucleotide biosynthetic process	17	0.0072	1	0.0141	0.315018	E	1.95833
GO:0042625	ATPase activity, coupled to transmembrane movement of ions	18	0.0074	1	0.0141	0.319574	E	1.90541
GO:0003755	peptidyl-prolyl cis-trans isomerase activity	18	0.0074	1	0.0141	0.319574	E	1.90541
GO:0016859	cis-trans isomerase activity	18	0.0074	1	0.0141	0.319574	E	1.90541
GO:0045333	cellular respiration	18	0.0076	1	0.0141	0.323605	E	1.85526
GO:0015980	energy derivation by oxidation of organic compounds	18	0.0076	1	0.0141	0.323605	E	1.85526
GO:0034621	cellular macromolecular complex subunit organization	18	0.0076	1	0.0141	0.323605	E	1.85526
GO:0016741	transferase activity, transferring one-carbon groups	20	0.0082	1	0.0141	0.334742	E	1.71951
GO:0008168	methyltransferase activity	20	0.0082	1	0.0141	0.334742	E	1.71951
GO:0009165	nucleotide biosynthetic process	20	0.0085	1	0.0141	0.338428	E	1.65882
GO:0065003	macromolecular complex assembly	20	0.0085	1	0.0141	0.338428	E	1.65882
GO:0020015	glycosome	20	0.0086	1	0.0139	0.34275	E	1.61628	C
GO:0003924	GTPase activity	23	0.0095	1	0.0141	0.352322	E	1.48421
GO:0043933	macromolecular complex subunit organization	23	0.0097	1	0.0141	0.355355	E	1.45361
GO:0010926	anatomical structure formation	23	0.0097	1	0.0141	0.355355	E	1.45361
GO:0046365	monosaccharide catabolic process	23	0.0097	1	0.0141	0.355355	E	1.45361
GO:0022607	cellular component assembly	23	0.0097	1	0.0141	0.355355	E	1.45361
GO:0044275	cellular carbohydrate catabolic process	23	0.0097	1	0.0141	0.355355	E	1.45361
GO:0006007	glucose catabolic process	23	0.0097	1	0.0141	0.355355	E	1.45361
GO:0019320	hexose catabolic process	23	0.0097	1	0.0141	0.355355	E	1.45361
GO:0046164	alcohol catabolic process	23	0.0097	1	0.0141	0.355355	E	1.45361
GO:0016052	carbohydrate catabolic process	24	0.0101	1	0.0141	0.359723	E	1.39604
GO:0008135	translation factor activity, nucleic acid binding	25	0.0103	1	0.0141	0.360976	E	1.36893	F
GO:0045182	translation regulator activity	25	0.0103	1	0.0141	0.360976	E	1.36893	F
GO:0006006	glucose metabolic process	25	0.0106	1	0.0141	0.363506	E	1.33019
GO:0031981	nuclear lumen	25	0.0108	1	0.0139	0.366318	E	1.28704
GO:0042254	ribosome biogenesis	26	0.011	1	0.0141	0.366738	E	1.28182
GO:0016757	transferase activity, transferring glycosyl groups	27	0.0111	1	0.0141	0.367458	E	1.27027
GO:0022613	ribonucleoprotein complex biogenesis	27	0.0114	1	0.0141	0.369445	E	1.23684
GO:0004518	nuclease activity	29	0.0119	1	0.0141	0.371986	E	1.18487	F
GO:0006260	DNA replication	30	0.0127	1	0.0141	0.374702	E	1.11024
GO:0019318	hexose metabolic process	30	0.0127	1	0.0141	0.374702	E	1.11024
GO:0005996	monosaccharide metabolic process	31	0.0131	1	0.0141	0.375585	E	1.07634
GO:0004721	phosphoprotein phosphatase activity	36	0.0148	1	0.0141	0.375191	D	0.952703	F
GO:0042626	ATPase activity, coupled to transmembrane movement of substances	36	0.0148	1	0.0141	0.375191	D	0.952703
GO:0043492	ATPase activity, coupled to movement of substances	36	0.0148	1	0.0141	0.375191	D	0.952703
GO:0044262	cellular carbohydrate metabolic process	36	0.0152	1	0.0141	0.374515	D	0.927632
GO:0016820	hydrolase activity, acting on acid anhydrides, catalyzing transmembrane movement of substances	37	0.0152	1	0.0141	0.374324	D	0.927632
GO:0016853	isomerase activity	37	0.0152	1	0.0141	0.374324	D	0.927632
GO:0051276	chromosome organization	37	0.0156	1	0.0141	0.373349	D	0.903846
GO:0015405	P-P-bond-hydrolysis-driven transmembrane transporter activity	38	0.0157	1	0.0141	0.373181	D	0.898089
GO:0015399	primary active transmembrane transporter activity	38	0.0157	1	0.0141	0.373181	D	0.898089
GO:0007049	cell cycle	39	0.0165	1	0.0141	0.370215	D	0.854545	P
GO:0006066	cellular alcohol metabolic process	40	0.0169	1	0.0141	0.36828	D	0.83432
GO:0008026	ATP-dependent helicase activity	44	0.0181	1	0.0141	0.361421	D	0.779006
GO:0070035	purine NTP-dependent helicase activity	44	0.0181	1	0.0141	0.361421	D	0.779006
GO:0005975	carbohydrate metabolic process	43	0.0182	1	0.0141	0.361194	D	0.774725	P
GO:0044428	nuclear part	46	0.0198	1	0.0139	0.34778	D	0.70202
GO:0008610	lipid biosynthetic process	48	0.0203	1	0.0141	0.345928	D	0.694581
GO:0044085	cellular component biogenesis	48	0.0203	1	0.0141	0.345928	D	0.694581
GO:0046907	intracellular transport	50	0.0211	1	0.0141	0.338893	D	0.668246
GO:0016874	ligase activity	53	0.0218	1	0.0141	0.332738	D	0.646789
GO:0051641	cellular localization	58	0.0245	1	0.0141	0.307383	D	0.57551
GO:0051649	establishment of localization in cell	58	0.0245	1	0.0141	0.307383	D	0.57551
GO:0044255	cellular lipid metabolic process	59	0.0249	1	0.0141	0.303195	D	0.566265
GO:0070011	peptidase activity, acting on L-amino acid peptides	70	0.0288	2	0.0282	0.278392	D	0.979167
GO:0006082	organic acid metabolic process	70	0.0296	2	0.0282	0.277826	D	0.952703
GO:0019752	carboxylic acid metabolic process	70	0.0296	2	0.0282	0.277826	D	0.952703	P
GO:0044265	cellular macromolecule catabolic process	65	0.0275	1	0.0141	0.277568	D	0.512727
GO:0008233	peptidase activity	73	0.0301	2	0.0282	0.2771	D	0.936877	F
GO:0006259	DNA metabolic process	74	0.0313	2	0.0282	0.274988	D	0.900958	P
GO:0050794	regulation of cellular process	77	0.0326	2	0.0282	0.271771	D	0.865031
GO:0006629	lipid metabolic process	67	0.0283	1	0.0141	0.268955	D	0.498233	P
GO:0050789	regulation of biological process	80	0.0338	2	0.0282	0.267733	D	0.83432	P
GO:0044248	cellular catabolic process	88	0.0372	2	0.0282	0.253682	D	0.758065
GO:0005875	microtubule associated complex	69	0.0297	1	0.0139	0.25093	D	0.468013
GO:0006996	organelle organization	73	0.0309	1	0.0141	0.243349	D	0.456311	P
GO:0003735	structural constituent of ribosome	99	0.0408	2	0.0282	0.235013	D	0.691176
GO:0016043	cellular component organization	102	0.0431	3	0.0423	0.2322	D	0.981439	P
GO:0004674	protein serine/threonine kinase activity	117	0.0482	3	0.0423	0.22521	D	0.877593
GO:0006396	RNA processing	117	0.0495	3	0.0423	0.222282	D	0.854545
GO:0005840	ribosome	99	0.0426	2	0.0278	0.221197	D	0.652582	C
GO:0005515	protein binding	130	0.0536	3	0.0423	0.209821	D	0.789179	F
GO:0005198	structural molecule activity	117	0.0482	2	0.0282	0.190896	D	0.585062	F
GO:0015630	microtubule cytoskeleton	85	0.0366	1	0.0139	0.184954	D	0.379781
GO:0006468	protein amino acid phosphorylation	164	0.0693	4	0.0563	0.183913	D	0.81241
GO:0016310	phosphorylation	175	0.074	5	0.0704	0.183368	D	0.951351	P
GO:0004672	protein kinase activity	172	0.0709	4	0.0563	0.179557	D	0.794076	F
GO:0003723	RNA binding	124	0.0511	2	0.0282	0.173447	D	0.551859	F
GO:0030529	ribonucleoprotein complex	118	0.0508	2	0.0278	0.17105	D	0.547244
GO:0006412	translation	150	0.0634	3	0.0423	0.169697	D	0.667192	P
GO:0017111	nucleoside-triphosphatase activity	212	0.0874	6	0.0845	0.169651	D	0.966819
GO:0016462	pyrophosphatase activity	217	0.0894	6	0.0845	0.168378	D	0.94519
GO:0016818	hydrolase activity, acting on acid anhydrides, in phosphorus-containing anhydrides	217	0.0894	6	0.0845	0.168378	D	0.94519
GO:0016817	hydrolase activity, acting on acid anhydrides	218	0.0898	6	0.0845	0.168051	D	0.94098
GO:0044430	cytoskeletal part	90	0.0387	1	0.0139	0.166667	D	0.359173
GO:0016301	kinase activity	206	0.0849	5	0.0704	0.166104	D	0.829211	F
GO:0016773	phosphotransferase activity, alcohol group as acceptor	185	0.0762	4	0.0563	0.162593	D	0.738845
GO:0044446	intracellular organelle part	240	0.1033	7	0.0972	0.156797	D	0.940949
GO:0044422	organelle part	248	0.1067	7	0.0972	0.153458	D	0.910965
GO:0006793	phosphorus metabolic process	217	0.0918	5	0.0704	0.148516	D	0.766885
GO:0006796	phosphate metabolic process	217	0.0918	5	0.0704	0.148516	D	0.766885
GO:0043412	biopolymer modification	280	0.1184	7	0.0986	0.13758	D	0.83277
GO:0003676	nucleic acid binding	232	0.0956	5	0.0704	0.137495	D	0.736402	F
GO:0032555	purine ribonucleotide binding	335	0.138	9	0.1268	0.137334	D	0.918841
GO:0032553	ribonucleotide binding	335	0.138	9	0.1268	0.137334	D	0.918841
GO:0043232	intracellular non-membrane-bounded organelle	222	0.0955	5	0.0694	0.133733	D	0.726702
GO:0043228	non-membrane-bounded organelle	222	0.0955	5	0.0694	0.133733	D	0.726702
GO:0043227	membrane-bounded organelle	360	0.1549	11	0.1528	0.131531	D	0.986443
GO:0043231	intracellular membrane-bounded organelle	360	0.1549	11	0.1528	0.131531	D	0.986443
GO:0005856	cytoskeleton	101	0.0435	1	0.0139	0.131004	D	0.31954	C
GO:0043687	post-translational protein modification	202	0.0854	4	0.0563	0.130344	D	0.659251
GO:0044249	cellular biosynthetic process	292	0.1235	7	0.0986	0.127225	D	0.798381
GO:0005524	ATP binding	300	0.1236	7	0.0986	0.1269	D	0.797735
GO:0032559	adenyl ribonucleotide binding	300	0.1236	7	0.0986	0.1269	D	0.797735
GO:0009058	biosynthetic process	301	0.1273	7	0.0986	0.118848	D	0.774548	P
GO:0005634	nucleus	140	0.0602	2	0.0278	0.118197	D	0.461794	C
GO:0016772	transferase activity, transferring phosphorus-containing groups	251	0.1034	5	0.0704	0.114203	D	0.680851
GO:0006139	nucleobase, nucleoside, nucleotide and nucleic acid metabolic process	368	0.1556	9	0.1268	0.111854	D	0.81491	P
GO:0034961	cellular biopolymer biosynthetic process	218	0.0922	4	0.0563	0.106918	D	0.610629
GO:0043284	biopolymer biosynthetic process	219	0.0926	4	0.0563	0.105508	D	0.607991
GO:0006464	protein modification process	253	0.107	5	0.0704	0.103741	D	0.657944	P
GO:0016070	RNA metabolic process	190	0.0803	3	0.0423	0.0983872	D	0.526775
GO:0005488	binding	825	0.3399	23	0.3239	0.0980202	D	0.952927	F
GO:0043226	organelle	561	0.2414	15	0.2083	0.09285	D	0.862883	C
GO:0043229	intracellular organelle	561	0.2414	15	0.2083	0.09285	D	0.862883
GO:0019538	protein metabolic process	596	0.252	15	0.2113	0.0836448	D	0.838492	P
GO:0008152	metabolic process	1173	0.496	33	0.4648	0.0832784	D	0.937097	P
GO:0010467	gene expression	307	0.1298	6	0.0845	0.0806787	D	0.651002
GO:0034645	cellular macromolecule biosynthetic process	239	0.1011	4	0.0563	0.0793153	D	0.556874
GO:0009059	macromolecule biosynthetic process	240	0.1015	4	0.0563	0.0781177	D	0.55468
GO:0009987	cellular process	1293	0.5467	36	0.507	0.0760214	D	0.927382
GO:0043234	protein complex	242	0.1041	4	0.0556	0.0670937	D	0.534102	C
GO:0044267	cellular protein metabolic process	540	0.2283	12	0.169	0.0581314	D	0.740254
GO:0044237	cellular metabolic process	1042	0.4406	26	0.3662	0.0431166	D	0.831139
GO:0043170	macromolecule metabolic process	882	0.3729	21	0.2958	0.0399993	D	0.793242
GO:0043283	biopolymer metabolic process	857	0.3624	20	0.2817	0.0364348	D	0.777318
GO:0044424	intracellular part	700	0.3012	16	0.2222	0.0355555	D	0.737716
GO:0005622	intracellular	710	0.3055	16	0.2222	0.0314561	D	0.727332	C
GO:0032991	macromolecular complex	360	0.1549	6	0.0833	0.0312389	D	0.537766
GO:0044238	primary metabolic process	1049	0.4436	25	0.3521	0.0282996	D	0.793733	P
GO:0044260	cellular macromolecule metabolic process	823	0.348	18	0.2535	0.0241595	D	0.728448
GO:0034960	cellular biopolymer metabolic process	800	0.3383	17	0.2394	0.0206276	D	0.707656

## Sheet: 1-1-1-0
GO ID	GO Term	NB_IN_REF	FREQ_IN_REF	NB_IN_SET	FREQ_IN_SET	P-value	ENRICHMENT/DEPLETION	Ratio: F/D	Category
GO:0003917	DNA topoisomerase type I activity	4	0.0016	3	0.0189	0.0010338	E	11.8125			1-1-1-0 profile: Significant loss-of-fitness in DIF only
GO:0006629	lipid metabolic process	67	0.0283	11	0.0696	0.0028185	E	2.45936	P
GO:0019752	carboxylic acid metabolic process	70	0.0296	11	0.0696	0.0038918	E	2.35135	P
GO:0006082	organic acid metabolic process	70	0.0296	11	0.0696	0.0038918	E	2.35135
GO:0003916	DNA topoisomerase activity	6	0.0025	3	0.0189	0.0045249	E	7.56
GO:0006265	DNA topological change	6	0.0025	3	0.019	0.0047786	E	7.6
GO:0016491	oxidoreductase activity	106	0.0437	14	0.0881	0.00487	E	2.01602	F		GO slim set
GO:0006575	cellular amino acid derivative metabolic process	12	0.0051	4	0.0253	0.0055423	E	4.96078
GO:0032787	monocarboxylic acid metabolic process	21	0.0089	5	0.0316	0.0086989	E	3.55056			Categories:
GO:0044255	cellular lipid metabolic process	59	0.0249	9	0.057	0.0098706	E	2.28916			P:Biological Process
GO:0043412	biopolymer modification	280	0.1184	27	0.1709	0.0117345	E	1.44341			C:Cellular Component
GO:0006304	DNA modification	3	0.0013	2	0.0127	0.0124319	E	9.76923			F:Molecular Function
GO:0006631	fatty acid metabolic process	16	0.0068	4	0.0253	0.0155413	E	3.72059
GO:0016903	oxidoreductase activity, acting on the aldehyde or oxo group of donors	9	0.0037	3	0.0189	0.015561	E	5.10811
GO:0016310	phosphorylation	175	0.074	18	0.1139	0.0185808	E	1.53919	P
GO:0006796	phosphate metabolic process	217	0.0918	21	0.1329	0.0208691	E	1.44771
GO:0006793	phosphorus metabolic process	217	0.0918	21	0.1329	0.0208691	E	1.44771
GO:0016624	oxidoreductase activity, acting on the aldehyde or oxo group of donors, disulfide as acceptor	4	0.0016	2	0.0126	0.0223921	E	7.875
GO:0006268	DNA unwinding during replication	4	0.0017	2	0.0127	0.0232217	E	7.47059
GO:0032508	DNA duplex unwinding	4	0.0017	2	0.0127	0.0232217	E	7.47059
GO:0032392	DNA geometric change	4	0.0017	2	0.0127	0.0232217	E	7.47059
GO:0008152	metabolic process	1173	0.496	87	0.5506	0.0239541	E	1.11008	P
GO:0005739	mitochondrion	152	0.0654	15	0.1014	0.0263636	E	1.55046	C
GO:0006464	protein modification process	253	0.107	23	0.1456	0.0280007	E	1.36075	P
GO:0006576	biogenic amine metabolic process	11	0.0047	3	0.019	0.0280569	E	4.04255
GO:0043687	post-translational protein modification	202	0.0854	19	0.1203	0.031003	E	1.40867
GO:0003824	catalytic activity	1017	0.419	74	0.4654	0.0311212	E	1.11074	F
GO:0006468	protein amino acid phosphorylation	164	0.0693	16	0.1013	0.0333796	E	1.46176
GO:0006519	cellular amino acid and derivative metabolic process	52	0.022	7	0.0443	0.0346346	E	2.01364	P
GO:0009308	cellular amine metabolic process	52	0.022	7	0.0443	0.0346346	E	2.01364
GO:0006807	nitrogen compound metabolic process	53	0.0224	7	0.0443	0.0373	E	1.97768
GO:0034641	cellular nitrogen compound metabolic process	53	0.0224	7	0.0443	0.0373	E	1.97768
GO:0044237	cellular metabolic process	1042	0.4406	76	0.481	0.0375882	E	1.09169
GO:0016773	phosphotransferase activity, alcohol group as acceptor	185	0.0762	17	0.1069	0.0381481	E	1.40289
GO:0004672	protein kinase activity	172	0.0709	16	0.1006	0.0391668	E	1.4189	F
GO:0044238	primary metabolic process	1049	0.4436	76	0.481	0.0406817	E	1.08431	P
GO:0006725	cellular aromatic compound metabolic process	13	0.0055	3	0.019	0.0424372	E	3.45455
GO:0016301	kinase activity	206	0.0849	18	0.1132	0.0463135	E	1.33333	F
GO:0016740	transferase activity	342	0.1409	27	0.1698	0.0500034	E	1.20511	F
GO:0042592	homeostatic process	14	0.0059	3	0.019	0.0504516	E	3.22034
GO:0042401	biogenic amine biosynthetic process	6	0.0025	2	0.0127	0.0506344	E	5.08
GO:0042398	cellular amino acid derivative biosynthetic process	6	0.0025	2	0.0127	0.0506344	E	5.08
GO:0008610	lipid biosynthetic process	48	0.0203	6	0.038	0.0592879	E	1.87192
GO:0016853	isomerase activity	37	0.0152	5	0.0314	0.0597238	E	2.06579
GO:0051276	chromosome organization	37	0.0156	5	0.0316	0.0630527	E	2.02564
GO:0017087	mitochondrial processing peptidase complex	1	0.0004	1	0.0068	0.0636833	E	17
GO:0005942	phosphoinositide 3-kinase complex	1	0.0004	1	0.0068	0.0636833	E	17
GO:0016772	transferase activity, transferring phosphorus-containing groups	251	0.1034	20	0.1258	0.0640792	E	1.21663
GO:0004452	isopentenyl-diphosphate delta-isomerase activity	1	0.0004	1	0.0063	0.065513	E	15.75
GO:0008732	L-allo-threonine aldolase activity	1	0.0004	1	0.0063	0.065513	E	15.75
GO:0070704	sterol desaturase activity	1	0.0004	1	0.0063	0.065513	E	15.75
GO:0015506	nucleoside:hydrogen symporter activity	1	0.0004	1	0.0063	0.065513	E	15.75
GO:0004588	orotate phosphoribosyltransferase activity	1	0.0004	1	0.0063	0.065513	E	15.75
GO:0000248	C-5 sterol desaturase activity	1	0.0004	1	0.0063	0.065513	E	15.75
GO:0008452	RNA ligase activity	1	0.0004	1	0.0063	0.065513	E	15.75
GO:0004019	adenylosuccinate synthase activity	1	0.0004	1	0.0063	0.065513	E	15.75
GO:0009013	succinate-semialdehyde dehydrogenase [NAD(P)+] activity	1	0.0004	1	0.0063	0.065513	E	15.75
GO:0004077	biotin-[acetyl-CoA-carboxylase] ligase activity	1	0.0004	1	0.0063	0.065513	E	15.75
GO:0008812	choline dehydrogenase activity	1	0.0004	1	0.0063	0.065513	E	15.75
GO:0004793	threonine aldolase activity	1	0.0004	1	0.0063	0.065513	E	15.75
GO:0016863	intramolecular oxidoreductase activity, transposing C=C bonds	1	0.0004	1	0.0063	0.065513	E	15.75
GO:0050242	pyruvate, phosphate dikinase activity	1	0.0004	1	0.0063	0.065513	E	15.75
GO:0003938	IMP dehydrogenase activity	1	0.0004	1	0.0063	0.065513	E	15.75
GO:0018271	biotin-protein ligase activity	1	0.0004	1	0.0063	0.065513	E	15.75
GO:0003972	RNA ligase (ATP) activity	1	0.0004	1	0.0063	0.065513	E	15.75
GO:0034960	cellular biopolymer metabolic process	800	0.3383	55	0.3481	0.0664159	E	1.02897
GO:0006577	betaine metabolic process	1	0.0004	1	0.0063	0.0668076	E	15.75
GO:0034982	mitochondrial protein processing	1	0.0004	1	0.0063	0.0668076	E	15.75
GO:0031455	glycine betaine metabolic process	1	0.0004	1	0.0063	0.0668076	E	15.75
GO:0031456	glycine betaine biosynthetic process	1	0.0004	1	0.0063	0.0668076	E	15.75
GO:0006578	betaine biosynthetic process	1	0.0004	1	0.0063	0.0668076	E	15.75
GO:0019626	short-chain fatty acid catabolic process	1	0.0004	1	0.0063	0.0668076	E	15.75
GO:0042364	water-soluble vitamin biosynthetic process	1	0.0004	1	0.0063	0.0668076	E	15.75
GO:0009102	biotin biosynthetic process	1	0.0004	1	0.0063	0.0668076	E	15.75
GO:0009110	vitamin biosynthetic process	1	0.0004	1	0.0063	0.0668076	E	15.75
GO:0019285	glycine betaine biosynthetic process from choline	1	0.0004	1	0.0063	0.0668076	E	15.75
GO:0046359	butyrate catabolic process	1	0.0004	1	0.0063	0.0668076	E	15.75
GO:0019605	butyrate metabolic process	1	0.0004	1	0.0063	0.0668076	E	15.75
GO:0045454	cell redox homeostasis	1	0.0004	1	0.0063	0.0668076	E	15.75
GO:0008299	isoprenoid biosynthetic process	1	0.0004	1	0.0063	0.0668076	E	15.75
GO:0009062	fatty acid catabolic process	1	0.0004	1	0.0063	0.0668076	E	15.75
GO:0019695	choline metabolic process	1	0.0004	1	0.0063	0.0668076	E	15.75
GO:0009450	gamma-aminobutyric acid catabolic process	1	0.0004	1	0.0063	0.0668076	E	15.75
GO:0016054	organic acid catabolic process	1	0.0004	1	0.0063	0.0668076	E	15.75
GO:0030258	lipid modification	1	0.0004	1	0.0063	0.0668076	E	15.75
GO:0019439	aromatic compound catabolic process	1	0.0004	1	0.0063	0.0668076	E	15.75
GO:0006768	biotin metabolic process	1	0.0004	1	0.0063	0.0668076	E	15.75
GO:0046834	lipid phosphorylation	1	0.0004	1	0.0063	0.0668076	E	15.75
GO:0046459	short-chain fatty acid metabolic process	1	0.0004	1	0.0063	0.0668076	E	15.75
GO:0006720	isoprenoid metabolic process	1	0.0004	1	0.0063	0.0668076	E	15.75
GO:0000722	telomere maintenance via recombination	1	0.0004	1	0.0063	0.0668076	E	15.75
GO:0009448	gamma-aminobutyric acid metabolic process	1	0.0004	1	0.0063	0.0668076	E	15.75
GO:0046395	carboxylic acid catabolic process	1	0.0004	1	0.0063	0.0668076	E	15.75
GO:0006312	mitotic recombination	1	0.0004	1	0.0063	0.0668076	E	15.75
GO:0046854	phosphoinositide phosphorylation	1	0.0004	1	0.0063	0.0668076	E	15.75
GO:0006627	mitochondrial protein processing during import	1	0.0004	1	0.0063	0.0668076	E	15.75
GO:0043283	biopolymer metabolic process	857	0.3624	58	0.3671	0.0675035	E	1.01297
GO:0044260	cellular macromolecule metabolic process	823	0.348	55	0.3481	0.0688445	E	1.00029
GO:0043231	intracellular membrane-bounded organelle	360	0.1549	26	0.1757	0.0692347	E	1.13428
GO:0043227	membrane-bounded organelle	360	0.1549	26	0.1757	0.0692347	E	1.13428
GO:0003677	DNA binding	66	0.0272	7	0.044	0.0738279	E	1.61765	F
GO:0016874	ligase activity	53	0.0218	6	0.0377	0.0748744	E	1.72936
GO:0044249	cellular biosynthetic process	292	0.1235	22	0.1392	0.0786086	E	1.12713
GO:0032559	adenyl ribonucleotide binding	300	0.1236	22	0.1384	0.0802781	E	1.11974
GO:0005524	ATP binding	300	0.1236	22	0.1384	0.0802781	E	1.11974
GO:0030554	adenyl nucleotide binding	302	0.1244	22	0.1384	0.0817646	E	1.11254
GO:0009058	biosynthetic process	301	0.1273	22	0.1392	0.0852217	E	1.09348	P
GO:0032555	purine ribonucleotide binding	335	0.138	23	0.1447	0.0899965	E	1.04855
GO:0032553	ribonucleotide binding	335	0.138	23	0.1447	0.0899965	E	1.04855
GO:0006260	DNA replication	30	0.0127	4	0.0253	0.0903198	E	1.99213
GO:0017076	purine nucleotide binding	337	0.1389	23	0.1447	0.0906402	E	1.04176
GO:0008270	zinc ion binding	57	0.0235	6	0.0377	0.0906507	E	1.60426	F
GO:0000166	nucleotide binding	340	0.1401	23	0.1447	0.091443	E	1.03283	F
GO:0016021	integral to membrane	237	0.102	17	0.1149	0.0924199	E	1.12647	C
GO:0031224	intrinsic to membrane	237	0.102	17	0.1149	0.0924199	E	1.12647
GO:0016879	ligase activity, forming carbon-nitrogen bonds	31	0.0128	4	0.0252	0.0929371	E	1.96875
GO:0004674	protein serine/threonine kinase activity	117	0.0482	10	0.0629	0.0934121	E	1.30498
GO:0000723	telomere maintenance	9	0.0038	2	0.0127	0.0989641	E	3.34211
GO:0060249	anatomical structure homeostasis	9	0.0038	2	0.0127	0.0989641	E	3.34211
GO:0009063	cellular amino acid catabolic process	9	0.0038	2	0.0127	0.0989641	E	3.34211
GO:0032200	telomere organization	9	0.0038	2	0.0127	0.0989641	E	3.34211
GO:0046483	heterocycle metabolic process	9	0.0038	2	0.0127	0.0989641	E	3.34211
GO:0006259	DNA metabolic process	74	0.0313	7	0.0443	0.104758	E	1.41534	P
GO:0009165	nucleotide biosynthetic process	20	0.0085	3	0.019	0.104896	E	2.23529
GO:0044425	membrane part	265	0.114	17	0.1149	0.10572	E	1.00789
GO:0003676	nucleic acid binding	232	0.0956	16	0.1006	0.10576	E	1.0523	F
GO:0034645	cellular macromolecule biosynthetic process	239	0.1011	16	0.1013	0.108333	E	1.00198
GO:0046914	transition metal ion binding	63	0.026	6	0.0377	0.113679	E	1.45
GO:0006310	DNA recombination	10	0.0042	2	0.0127	0.115514	E	3.02381
GO:0016053	organic acid biosynthetic process	10	0.0042	2	0.0127	0.115514	E	3.02381
GO:0006633	fatty acid biosynthetic process	10	0.0042	2	0.0127	0.115514	E	3.02381
GO:0046394	carboxylic acid biosynthetic process	10	0.0042	2	0.0127	0.115514	E	3.02381
GO:0045252	oxoglutarate dehydrogenase complex	2	0.0009	1	0.0068	0.119307	E	7.55556
GO:0046540	U4/U6 x U5 tri-snRNP complex	2	0.0009	1	0.0068	0.119307	E	7.55556
GO:0016614	oxidoreductase activity, acting on CH-OH group of donors	22	0.0091	3	0.0189	0.119614	E	2.07692
GO:0005275	amine transmembrane transporter activity	22	0.0091	3	0.0189	0.119614	E	2.07692
GO:0042162	telomeric DNA binding	2	0.0008	1	0.0063	0.122493	E	7.875
GO:0043565	sequence-specific DNA binding	2	0.0008	1	0.0063	0.122493	E	7.875
GO:0015149	hexose transmembrane transporter activity	2	0.0008	1	0.0063	0.122493	E	7.875
GO:0015145	monosaccharide transmembrane transporter activity	2	0.0008	1	0.0063	0.122493	E	7.875
GO:0003691	double-stranded telomeric DNA binding	2	0.0008	1	0.0063	0.122493	E	7.875
GO:0016303	1-phosphatidylinositol-3-kinase activity	2	0.0008	1	0.0063	0.122493	E	7.875
GO:0004047	aminomethyltransferase activity	2	0.0008	1	0.0063	0.122493	E	7.875
GO:0016781	phosphotransferase activity, paired acceptors	2	0.0008	1	0.0063	0.122493	E	7.875
GO:0003702	RNA polymerase II transcription factor activity	2	0.0008	1	0.0063	0.122493	E	7.875
GO:0003995	acyl-CoA dehydrogenase activity	2	0.0008	1	0.0063	0.122493	E	7.875
GO:0016832	aldehyde-lyase activity	2	0.0008	1	0.0063	0.122493	E	7.875
GO:0004591	oxoglutarate dehydrogenase (succinyl-transferring) activity	2	0.0008	1	0.0063	0.122493	E	7.875
GO:0035004	phosphoinositide 3-kinase activity	2	0.0008	1	0.0063	0.122493	E	7.875
GO:0004470	malic enzyme activity	2	0.0008	1	0.0063	0.122493	E	7.875
GO:0030384	phosphoinositide metabolic process	22	0.0093	3	0.019	0.123585	E	2.04301
GO:0009103	lipopolysaccharide biosynthetic process	2	0.0008	1	0.0063	0.124742	E	7.875
GO:0019342	trypanothione biosynthetic process	2	0.0008	1	0.0063	0.124742	E	7.875
GO:0008295	spermidine biosynthetic process	2	0.0008	1	0.0063	0.124742	E	7.875
GO:0008653	lipopolysaccharide metabolic process	2	0.0008	1	0.0063	0.124742	E	7.875
GO:0009072	aromatic amino acid family metabolic process	2	0.0008	1	0.0063	0.124742	E	7.875
GO:0008645	hexose transport	2	0.0008	1	0.0063	0.124742	E	7.875
GO:0006568	tryptophan metabolic process	2	0.0008	1	0.0063	0.124742	E	7.875
GO:0044264	cellular polysaccharide metabolic process	2	0.0008	1	0.0063	0.124742	E	7.875
GO:0006586	indolalkylamine metabolic process	2	0.0008	1	0.0063	0.124742	E	7.875
GO:0016042	lipid catabolic process	2	0.0008	1	0.0063	0.124742	E	7.875
GO:0006108	malate metabolic process	2	0.0008	1	0.0063	0.124742	E	7.875
GO:0042430	indole and derivative metabolic process	2	0.0008	1	0.0063	0.124742	E	7.875
GO:0005976	polysaccharide metabolic process	2	0.0008	1	0.0063	0.124742	E	7.875
GO:0016485	protein processing	2	0.0008	1	0.0063	0.124742	E	7.875
GO:0042434	indole derivative metabolic process	2	0.0008	1	0.0063	0.124742	E	7.875
GO:0044242	cellular lipid catabolic process	2	0.0008	1	0.0063	0.124742	E	7.875
GO:0006553	lysine metabolic process	2	0.0008	1	0.0063	0.124742	E	7.875
GO:0033692	cellular polysaccharide biosynthetic process	2	0.0008	1	0.0063	0.124742	E	7.875
GO:0015749	monosaccharide transport	2	0.0008	1	0.0063	0.124742	E	7.875
GO:0006554	lysine catabolic process	2	0.0008	1	0.0063	0.124742	E	7.875
GO:0046206	trypanothione metabolic process	2	0.0008	1	0.0063	0.124742	E	7.875
GO:0051604	protein maturation	2	0.0008	1	0.0063	0.124742	E	7.875
GO:0044270	nitrogen compound catabolic process	11	0.0047	2	0.0127	0.131832	E	2.70213
GO:0009310	amine catabolic process	11	0.0047	2	0.0127	0.131832	E	2.70213
GO:0006650	glycerophospholipid metabolic process	23	0.0097	3	0.019	0.132721	E	1.95876
GO:0015837	amine transport	23	0.0097	3	0.019	0.132721	E	1.95876
GO:0006865	amino acid transport	23	0.0097	3	0.019	0.132721	E	1.95876
GO:0043169	cation binding	111	0.0457	8	0.0503	0.142868	E	1.10066
GO:0043167	ion binding	111	0.0457	8	0.0503	0.142868	E	1.10066
GO:0046872	metal ion binding	111	0.0457	8	0.0503	0.142868	E	1.10066
GO:0030528	transcription regulator activity	12	0.0049	2	0.0126	0.14401	E	2.57143	F
GO:0016668	oxidoreductase activity, acting on sulfur group of donors, NAD or NADP as acceptor	12	0.0049	2	0.0126	0.14401	E	2.57143
GO:0022891	substrate-specific transmembrane transporter activity	73	0.0301	6	0.0377	0.145678	E	1.25249
GO:0009309	amine biosynthetic process	12	0.0051	2	0.0127	0.147714	E	2.4902
GO:0044271	nitrogen compound biosynthetic process	12	0.0051	2	0.0127	0.147714	E	2.4902
GO:0006996	organelle organization	73	0.0309	6	0.038	0.149426	E	1.22977	P
GO:0046942	carboxylic acid transport	25	0.0106	3	0.019	0.1503	E	1.79245
GO:0015849	organic acid transport	25	0.0106	3	0.019	0.1503	E	1.79245
GO:0022857	transmembrane transporter activity	99	0.0408	7	0.044	0.15458	E	1.07843
GO:0016043	cellular component organization	102	0.0431	7	0.0443	0.15747	E	1.02784	P
GO:0008194	UDP-glycosyltransferase activity	13	0.0054	2	0.0126	0.159129	E	2.33333
GO:0006520	cellular amino acid metabolic process	42	0.0178	4	0.0253	0.162351	E	1.42135
GO:0016757	transferase activity, transferring glycosyl groups	27	0.0111	3	0.0189	0.162418	E	1.7027
GO:0022892	substrate-specific transporter activity	82	0.0338	6	0.0377	0.163488	E	1.11538
GO:0065008	regulation of biological quality	27	0.0114	3	0.019	0.166654	E	1.66667
GO:0004497	monooxygenase activity	3	0.0012	1	0.0063	0.171767	E	5.25
GO:0003690	double-stranded DNA binding	3	0.0012	1	0.0063	0.171767	E	5.25
GO:0016886	ligase activity, forming phosphoric ester bonds	3	0.0012	1	0.0063	0.171767	E	5.25
GO:0016705	oxidoreductase activity, acting on paired donors, with incorporation or reduction of molecular oxygen	3	0.0012	1	0.0063	0.171767	E	5.25
GO:0043566	structure-specific DNA binding	3	0.0012	1	0.0063	0.171767	E	5.25
GO:0004806	triacylglycerol lipase activity	3	0.0012	1	0.0063	0.171767	E	5.25
GO:0016717	oxidoreductase activity, acting on paired donors, with oxidation of a pair of donors resulting in the reduction of molecular oxygen to two molecules of water	3	0.0012	1	0.0063	0.171767	E	5.25
GO:0009922	fatty acid elongase activity	3	0.0012	1	0.0063	0.171767	E	5.25
GO:0004177	aminopeptidase activity	3	0.0012	1	0.0063	0.171767	E	5.25
GO:0019464	glycine decarboxylation via glycine cleavage system	3	0.0013	1	0.0063	0.17468	E	4.84615
GO:0001676	long-chain fatty acid metabolic process	3	0.0013	1	0.0063	0.17468	E	4.84615
GO:0044272	sulfur compound biosynthetic process	3	0.0013	1	0.0063	0.17468	E	4.84615
GO:0070585	protein localization in mitochondrion	3	0.0013	1	0.0063	0.17468	E	4.84615
GO:0016575	histone deacetylation	3	0.0013	1	0.0063	0.17468	E	4.84615
GO:0006596	polyamine biosynthetic process	3	0.0013	1	0.0063	0.17468	E	4.84615
GO:0015858	nucleoside transport	3	0.0013	1	0.0063	0.17468	E	4.84615
GO:0042759	long-chain fatty acid biosynthetic process	3	0.0013	1	0.0063	0.17468	E	4.84615
GO:0000271	polysaccharide biosynthetic process	3	0.0013	1	0.0063	0.17468	E	4.84615
GO:0006476	protein amino acid deacetylation	3	0.0013	1	0.0063	0.17468	E	4.84615
GO:0043648	dicarboxylic acid metabolic process	3	0.0013	1	0.0063	0.17468	E	4.84615
GO:0000160	two-component signal transduction system (phosphorelay)	3	0.0013	1	0.0063	0.17468	E	4.84615
GO:0009068	aspartate family amino acid catabolic process	3	0.0013	1	0.0063	0.17468	E	4.84615
GO:0006626	protein targeting to mitochondrion	3	0.0013	1	0.0063	0.17468	E	4.84615
GO:0006839	mitochondrial transport	3	0.0013	1	0.0063	0.17468	E	4.84615
GO:0042439	ethanolamine and derivative metabolic process	3	0.0013	1	0.0063	0.17468	E	4.84615
GO:0042219	cellular amino acid derivative catabolic process	3	0.0013	1	0.0063	0.17468	E	4.84615
GO:0045449	regulation of transcription	14	0.0059	2	0.0127	0.177551	E	2.15254
GO:0022804	active transmembrane transporter activity	68	0.028	5	0.0314	0.17874	E	1.12143
GO:0006753	nucleoside phosphate metabolic process	29	0.0123	3	0.019	0.181494	E	1.54472
GO:0009117	nucleotide metabolic process	29	0.0123	3	0.019	0.181494	E	1.54472
GO:0055086	nucleobase, nucleoside and nucleotide metabolic process	49	0.0207	4	0.0253	0.190013	E	1.22222
GO:0006164	purine nucleotide biosynthetic process	15	0.0063	2	0.0127	0.191272	E	2.01587
GO:0006163	purine nucleotide metabolic process	15	0.0063	2	0.0127	0.191272	E	2.01587
GO:0019219	regulation of nucleobase, nucleoside, nucleotide and nucleic acid metabolic process	16	0.0068	2	0.0127	0.204086	E	1.86765
GO:0005663	DNA replication factor C complex	4	0.0017	1	0.0068	0.209352	E	4
GO:0005667	transcription factor complex	4	0.0017	1	0.0068	0.209352	E	4
GO:0016667	oxidoreductase activity, acting on sulfur group of donors	17	0.007	2	0.0126	0.21198	E	1.8
GO:0015293	symporter activity	4	0.0016	1	0.0063	0.214095	E	3.9375
GO:0004321	fatty-acyl-CoA synthase activity	4	0.0016	1	0.0063	0.214095	E	3.9375
GO:0015295	solute:hydrogen symporter activity	4	0.0016	1	0.0063	0.214095	E	3.9375
GO:0001727	lipid kinase activity	4	0.0016	1	0.0063	0.214095	E	3.9375
GO:0004407	histone deacetylase activity	4	0.0016	1	0.0063	0.214095	E	3.9375
GO:0004312	fatty-acid synthase activity	4	0.0016	1	0.0063	0.214095	E	3.9375
GO:0015042	trypanothione-disulfide reductase activity	4	0.0016	1	0.0063	0.214095	E	3.9375
GO:0033558	protein deacetylase activity	4	0.0016	1	0.0063	0.214095	E	3.9375
GO:0016564	transcription repressor activity	4	0.0016	1	0.0063	0.214095	E	3.9375
GO:0015294	solute:cation symporter activity	4	0.0016	1	0.0063	0.214095	E	3.9375
GO:0006644	phospholipid metabolic process	35	0.0148	3	0.019	0.21523	E	1.28378
GO:0009260	ribonucleotide biosynthetic process	17	0.0072	2	0.0127	0.215937	E	1.76389
GO:0010556	regulation of macromolecule biosynthetic process	17	0.0072	2	0.0127	0.215937	E	1.76389
GO:0009259	ribonucleotide metabolic process	17	0.0072	2	0.0127	0.215937	E	1.76389
GO:0006261	DNA-dependent DNA replication	17	0.0072	2	0.0127	0.215937	E	1.76389
GO:0007005	mitochondrion organization	4	0.0017	1	0.0063	0.217426	E	3.70588	P
GO:0008216	spermidine metabolic process	4	0.0017	1	0.0063	0.217426	E	3.70588
GO:0009071	serine family amino acid catabolic process	4	0.0017	1	0.0063	0.217426	E	3.70588
GO:0006546	glycine catabolic process	4	0.0017	1	0.0063	0.217426	E	3.70588
GO:0033365	protein localization in organelle	4	0.0017	1	0.0063	0.217426	E	3.70588
GO:0006350	transcription	36	0.0152	3	0.019	0.219177	E	1.25	P
GO:0016651	oxidoreductase activity, acting on NADH or NADPH	18	0.0074	2	0.0126	0.222942	E	1.7027
GO:0042157	lipoprotein metabolic process	18	0.0076	2	0.0127	0.226789	E	1.67105
GO:0006497	protein amino acid lipidation	18	0.0076	2	0.0127	0.226789	E	1.67105
GO:0042158	lipoprotein biosynthetic process	18	0.0076	2	0.0127	0.226789	E	1.67105
GO:0006325	establishment or maintenance of chromatin architecture	18	0.0076	2	0.0127	0.226789	E	1.67105
GO:0006506	GPI anchor biosynthetic process	18	0.0076	2	0.0127	0.226789	E	1.67105
GO:0016311	dephosphorylation	39	0.0165	3	0.019	0.228152	E	1.15152
GO:0005829	cytosol	47	0.0202	3	0.0203	0.233903	E	1.00495	C
GO:0009889	regulation of biosynthetic process	19	0.008	2	0.0127	0.236622	E	1.5875
GO:0006505	GPI anchor metabolic process	19	0.008	2	0.0127	0.236622	E	1.5875
GO:0031326	regulation of cellular biosynthetic process	19	0.008	2	0.0127	0.236622	E	1.5875
GO:0046489	phosphoinositide biosynthetic process	19	0.008	2	0.0127	0.236622	E	1.5875
GO:0020015	glycosome	20	0.0086	2	0.0135	0.236841	E	1.56977	C
GO:0016741	transferase activity, transferring one-carbon groups	20	0.0082	2	0.0126	0.241938	E	1.53659
GO:0008168	methyltransferase activity	20	0.0082	2	0.0126	0.241938	E	1.53659
GO:0031301	integral to organelle membrane	5	0.0022	1	0.0068	0.245109	E	3.09091
GO:0005759	mitochondrial matrix	5	0.0022	1	0.0068	0.245109	E	3.09091
GO:0005657	replication fork	5	0.0022	1	0.0068	0.245109	E	3.09091
GO:0031227	intrinsic to endoplasmic reticulum membrane	5	0.0022	1	0.0068	0.245109	E	3.09091
GO:0030532	small nuclear ribonucleoprotein complex	5	0.0022	1	0.0068	0.245109	E	3.09091
GO:0030176	integral to endoplasmic reticulum membrane	5	0.0022	1	0.0068	0.245109	E	3.09091
GO:0031980	mitochondrial lumen	5	0.0022	1	0.0068	0.245109	E	3.09091
GO:0031300	intrinsic to organelle membrane	5	0.0022	1	0.0068	0.245109	E	3.09091
GO:0046474	glycerophospholipid biosynthetic process	20	0.0085	2	0.0127	0.245431	E	1.49412
GO:0010468	regulation of gene expression	20	0.0085	2	0.0127	0.245431	E	1.49412
GO:0003779	actin binding	5	0.0021	1	0.0063	0.250168	E	3	F
GO:0008238	exopeptidase activity	5	0.0021	1	0.0063	0.250168	E	3
GO:0017070	U6 snRNA binding	5	0.0021	1	0.0063	0.250168	E	3
GO:0016620	oxidoreductase activity, acting on the aldehyde or oxo group of donors, NAD or NADP as acceptor	5	0.0021	1	0.0063	0.250168	E	3
GO:0019213	deacetylase activity	5	0.0021	1	0.0063	0.250168	E	3
GO:0004428	inositol or phosphatidylinositol kinase activity	5	0.0021	1	0.0063	0.250168	E	3
GO:0004835	tubulin-tyrosine ligase activity	5	0.0021	1	0.0063	0.250168	E	3
GO:0019725	cellular homeostasis	5	0.0021	1	0.0063	0.25371	E	3	P
GO:0006544	glycine metabolic process	5	0.0021	1	0.0063	0.25371	E	3
GO:0009218	pyrimidine ribonucleotide metabolic process	5	0.0021	1	0.0063	0.25371	E	3
GO:0009890	negative regulation of biosynthetic process	5	0.0021	1	0.0063	0.25371	E	3
GO:0045934	negative regulation of nucleobase, nucleoside, nucleotide and nucleic acid metabolic process	5	0.0021	1	0.0063	0.25371	E	3
GO:0015931	nucleobase, nucleoside, nucleotide and nucleic acid transport	5	0.0021	1	0.0063	0.25371	E	3
GO:0006220	pyrimidine nucleotide metabolic process	5	0.0021	1	0.0063	0.25371	E	3
GO:0010558	negative regulation of macromolecule biosynthetic process	5	0.0021	1	0.0063	0.25371	E	3
GO:0006595	polyamine metabolic process	5	0.0021	1	0.0063	0.25371	E	3
GO:0016481	negative regulation of transcription	5	0.0021	1	0.0063	0.25371	E	3
GO:0006221	pyrimidine nucleotide biosynthetic process	5	0.0021	1	0.0063	0.25371	E	3
GO:0009220	pyrimidine ribonucleotide biosynthetic process	5	0.0021	1	0.0063	0.25371	E	3
GO:0031327	negative regulation of cellular biosynthetic process	5	0.0021	1	0.0063	0.25371	E	3
GO:0080090	regulation of primary metabolic process	23	0.0097	2	0.0127	0.265806	E	1.30928
GO:0031323	regulation of cellular metabolic process	23	0.0097	2	0.0127	0.265806	E	1.30928
GO:0060255	regulation of macromolecule metabolic process	23	0.0097	2	0.0127	0.265806	E	1.30928
GO:0016881	acid-amino acid ligase activity	24	0.0099	2	0.0126	0.268293	E	1.27273
GO:0009451	RNA modification	24	0.0101	2	0.0127	0.270655	E	1.25743
GO:0045182	translation regulator activity	25	0.0103	2	0.0126	0.27257	E	1.2233	F
GO:0008135	translation factor activity, nucleic acid binding	25	0.0103	2	0.0126	0.27257	E	1.2233	F
GO:0019222	regulation of metabolic process	25	0.0106	2	0.0127	0.274586	E	1.19811
GO:0008287	protein serine/threonine phosphatase complex	6	0.0026	1	0.0068	0.275485	E	2.61538
GO:0006886	intracellular protein transport	26	0.011	2	0.0127	0.277637	E	1.15455
GO:0008380	RNA splicing	26	0.011	2	0.0127	0.277637	E	1.15455
GO:0070727	cellular macromolecule localization	26	0.011	2	0.0127	0.277637	E	1.15455
GO:0034613	cellular protein localization	26	0.011	2	0.0127	0.277637	E	1.15455
GO:0008324	cation transmembrane transporter activity	27	0.0111	2	0.0126	0.278572	E	1.13514
GO:0051186	cofactor metabolic process	27	0.0114	2	0.0127	0.27985	E	1.11404
GO:0008415	acyltransferase activity	28	0.0115	2	0.0126	0.280376	E	1.09565
GO:0016746	transferase activity, transferring acyl groups	28	0.0115	2	0.0126	0.280376	E	1.09565
GO:0016747	transferase activity, transferring acyl groups other than amino-acyl groups	28	0.0115	2	0.0126	0.280376	E	1.09565
GO:0016615	malate dehydrogenase activity	6	0.0025	1	0.0063	0.280618	E	2.52
GO:0008186	RNA-dependent ATPase activity	6	0.0025	1	0.0063	0.280618	E	2.52
GO:0051119	sugar transmembrane transporter activity	6	0.0025	1	0.0063	0.280618	E	2.52
GO:0004004	ATP-dependent RNA helicase activity	6	0.0025	1	0.0063	0.280618	E	2.52
GO:0016811	hydrolase activity, acting on carbon-nitrogen (but not peptide) bonds, in linear amides	6	0.0025	1	0.0063	0.280618	E	2.52
GO:0003724	RNA helicase activity	6	0.0025	1	0.0063	0.280618	E	2.52
GO:0015144	carbohydrate transmembrane transporter activity	6	0.0025	1	0.0063	0.280618	E	2.52
GO:0070013	intracellular organelle lumen	30	0.0129	2	0.0135	0.281389	E	1.04651
GO:0043233	organelle lumen	30	0.0129	2	0.0135	0.281389	E	1.04651
GO:0031974	membrane-enclosed lumen	30	0.0129	2	0.0135	0.281389	E	1.04651
GO:0004518	nuclease activity	29	0.0119	2	0.0126	0.281436	E	1.05882	F
GO:0008654	phospholipid biosynthetic process	29	0.0123	2	0.0127	0.281936	E	1.03252
GO:0008643	carbohydrate transport	6	0.0025	1	0.0063	0.284198	E	2.52
GO:0009069	serine family amino acid metabolic process	6	0.0025	1	0.0063	0.284198	E	2.52
GO:0015949	nucleobase, nucleoside and nucleotide interconversion	6	0.0025	1	0.0063	0.284198	E	2.52
GO:0017038	protein import	6	0.0025	1	0.0063	0.284198	E	2.52
GO:0048523	negative regulation of cellular process	6	0.0025	1	0.0063	0.284198	E	2.52
GO:0016570	histone modification	6	0.0025	1	0.0063	0.284198	E	2.52
GO:0016569	covalent chromatin modification	6	0.0025	1	0.0063	0.284198	E	2.52
GO:0031324	negative regulation of cellular metabolic process	6	0.0025	1	0.0063	0.284198	E	2.52
GO:0005789	endoplasmic reticulum membrane	7	0.003	1	0.0068	0.301018	E	2.26667
GO:0044432	endoplasmic reticulum part	7	0.003	1	0.0068	0.301018	E	2.26667
GO:0034061	DNA polymerase activity	7	0.0029	1	0.0063	0.306021	E	2.17241
GO:0016408	C-acyltransferase activity	7	0.0029	1	0.0063	0.306021	E	2.17241
GO:0005337	nucleoside transmembrane transporter activity	7	0.0029	1	0.0063	0.306021	E	2.17241
GO:0004091	carboxylesterase activity	7	0.0029	1	0.0063	0.306021	E	2.17241
GO:0046873	metal ion transmembrane transporter activity	7	0.0029	1	0.0063	0.306021	E	2.17241
GO:0017069	snRNA binding	7	0.0029	1	0.0063	0.306021	E	2.17241
GO:0003887	DNA-directed DNA polymerase activity	7	0.0029	1	0.0063	0.306021	E	2.17241
GO:0016298	lipase activity	7	0.0029	1	0.0063	0.306021	E	2.17241
GO:0016860	intramolecular oxidoreductase activity	7	0.0029	1	0.0063	0.306021	E	2.17241
GO:0004017	adenylate kinase activity	7	0.0029	1	0.0063	0.306021	E	2.17241
GO:0009066	aspartate family amino acid metabolic process	7	0.003	1	0.0063	0.309497	E	2.1
GO:0010629	negative regulation of gene expression	7	0.003	1	0.0063	0.309497	E	2.1
GO:0034637	cellular carbohydrate biosynthetic process	7	0.003	1	0.0063	0.309497	E	2.1
GO:0016556	mRNA modification	7	0.003	1	0.0063	0.309497	E	2.1
GO:0009898	internal side of plasma membrane	8	0.0034	1	0.0068	0.322194	E	2
GO:0042175	nuclear envelope-endoplasmic reticulum network	8	0.0034	1	0.0068	0.322194	E	2
GO:0015037	peptide disulfide oxidoreductase activity	8	0.0033	1	0.0063	0.326904	E	1.90909
GO:0015038	glutathione disulfide oxidoreductase activity	8	0.0033	1	0.0063	0.326904	E	1.90909
GO:0016763	transferase activity, transferring pentosyl groups	8	0.0033	1	0.0063	0.326904	E	1.90909
GO:0015932	nucleobase, nucleoside, nucleotide and nucleic acid transmembrane transporter activity	8	0.0033	1	0.0063	0.326904	E	1.90909
GO:0004362	glutathione-disulfide reductase activity	8	0.0033	1	0.0063	0.326904	E	1.90909
GO:0015291	secondary active transmembrane transporter activity	8	0.0033	1	0.0063	0.326904	E	1.90909
GO:0009892	negative regulation of metabolic process	8	0.0034	1	0.0063	0.33016	E	1.85294
GO:0030001	metal ion transport	8	0.0034	1	0.0063	0.33016	E	1.85294
GO:0010605	negative regulation of macromolecule metabolic process	8	0.0034	1	0.0063	0.33016	E	1.85294
GO:0006333	chromatin assembly or disassembly	8	0.0034	1	0.0063	0.33016	E	1.85294
GO:0048519	negative regulation of biological process	8	0.0034	1	0.0063	0.33016	E	1.85294
GO:0016051	carbohydrate biosynthetic process	8	0.0034	1	0.0063	0.33016	E	1.85294
GO:0016209	antioxidant activity	9	0.0037	1	0.0063	0.343746	E	1.7027	F
GO:0008092	cytoskeletal protein binding	9	0.0037	1	0.0063	0.343746	E	1.7027	F
GO:0016627	oxidoreductase activity, acting on the CH-CH group of donors	9	0.0037	1	0.0063	0.343746	E	1.7027
GO:0016830	carbon-carbon lyase activity	9	0.0037	1	0.0063	0.343746	E	1.7027
GO:0046356	acetyl-CoA catabolic process	9	0.0038	1	0.0063	0.346689	E	1.65789
GO:0006766	vitamin metabolic process	9	0.0038	1	0.0063	0.346689	E	1.65789
GO:0006767	water-soluble vitamin metabolic process	9	0.0038	1	0.0063	0.346689	E	1.65789
GO:0006790	sulfur metabolic process	9	0.0038	1	0.0063	0.346689	E	1.65789
GO:0006099	tricarboxylic acid cycle	9	0.0038	1	0.0063	0.346689	E	1.65789
GO:0009109	coenzyme catabolic process	9	0.0038	1	0.0063	0.346689	E	1.65789
GO:0051187	cofactor catabolic process	9	0.0038	1	0.0063	0.346689	E	1.65789
GO:0005694	chromosome	10	0.0043	1	0.0068	0.353229	E	1.5814	C
GO:0009986	cell surface	10	0.0043	1	0.0068	0.353229	E	1.5814
GO:0044427	chromosomal part	10	0.0043	1	0.0068	0.353229	E	1.5814
GO:0008138	protein tyrosine/serine/threonine phosphatase activity	10	0.0041	1	0.0063	0.356983	E	1.53659
GO:0006084	acetyl-CoA metabolic process	10	0.0042	1	0.0063	0.359541	E	1.5
GO:0005783	endoplasmic reticulum	11	0.0047	1	0.0068	0.363869	E	1.44681	C
GO:0045293	mRNA editing complex	11	0.0047	1	0.0068	0.363869	E	1.44681
GO:0003678	DNA helicase activity	11	0.0045	1	0.0063	0.367012	E	1.4
GO:0019201	nucleotide kinase activity	11	0.0045	1	0.0063	0.367012	E	1.4
GO:0006605	protein targeting	11	0.0047	1	0.0063	0.369128	E	1.34043
GO:0016568	chromatin modification	11	0.0047	1	0.0063	0.369128	E	1.34043
GO:0006355	regulation of transcription, DNA-dependent	11	0.0047	1	0.0063	0.369128	E	1.34043
GO:0005654	nucleoplasm	12	0.0052	1	0.0068	0.371721	E	1.30769	C
GO:0044451	nucleoplasm part	12	0.0052	1	0.0068	0.371721	E	1.30769
GO:0016790	thiolester hydrolase activity	12	0.0049	1	0.0063	0.374193	E	1.28571
GO:0015036	disulfide oxidoreductase activity	12	0.0049	1	0.0063	0.374193	E	1.28571
GO:0004221	ubiquitin thiolesterase activity	12	0.0049	1	0.0063	0.374193	E	1.28571
GO:0051252	regulation of RNA metabolic process	12	0.0051	1	0.0063	0.375829	E	1.23529
GO:0004222	metalloendopeptidase activity	13	0.0054	1	0.0063	0.378854	E	1.16667
GO:0016776	phosphotransferase activity, phosphate group as acceptor	13	0.0054	1	0.0063	0.378854	E	1.16667
GO:0022627	cytosolic small ribosomal subunit	14	0.006	1	0.0068	0.380269	E	1.13333
GO:0019205	nucleobase, nucleoside, nucleotide kinase activity	14	0.0058	1	0.0063	0.381293	E	1.08621
GO:0016810	hydrolase activity, acting on carbon-nitrogen (but not peptide) bonds	14	0.0058	1	0.0063	0.381293	E	1.08621
GO:0004527	exonuclease activity	14	0.0058	1	0.0063	0.381293	E	1.08621
GO:0016616	oxidoreductase activity, acting on the CH-OH group of donors, NAD or NADP as acceptor	14	0.0058	1	0.0063	0.381293	E	1.08621
GO:0005794	Golgi apparatus	15	0.0065	1	0.0068	0.381503	E	1.04615	C
GO:0015935	small ribosomal subunit	15	0.0065	1	0.0068	0.381503	E	1.04615
GO:0016876	ligase activity, forming aminoacyl-tRNA and related compounds	15	0.0062	1	0.0063	0.381778	E	1.01613
GO:0003743	translation initiation factor activity	15	0.0062	1	0.0063	0.381778	E	1.01613
GO:0016875	ligase activity, forming carbon-oxygen bonds	15	0.0062	1	0.0063	0.381778	E	1.01613
GO:0004812	aminoacyl-tRNA ligase activity	15	0.0062	1	0.0063	0.381778	E	1.01613
GO:0009152	purine ribonucleotide biosynthetic process	14	0.0059	1	0.0063	0.381895	E	1.0678
GO:0009150	purine ribonucleotide metabolic process	14	0.0059	1	0.0063	0.381895	E	1.0678
GO:0000375	RNA splicing, via transesterification reactions	16	0.0068	1	0.0063	0.380094	D	0.926471
GO:0000377	RNA splicing, via transesterification reactions with bulged adenosine as nucleophile	16	0.0068	1	0.0063	0.380094	D	0.926471
GO:0000398	nuclear mRNA splicing, via spliceosome	16	0.0068	1	0.0063	0.380094	D	0.926471
GO:0009060	aerobic respiration	16	0.0068	1	0.0063	0.380094	D	0.926471
GO:0006413	translational initiation	16	0.0068	1	0.0063	0.380094	D	0.926471
GO:0044459	plasma membrane part	18	0.0077	1	0.0068	0.375783	D	0.883117
GO:0016859	cis-trans isomerase activity	18	0.0074	1	0.0063	0.373839	D	0.851351
GO:0003755	peptidyl-prolyl cis-trans isomerase activity	18	0.0074	1	0.0063	0.373839	D	0.851351
GO:0004842	ubiquitin-protein ligase activity	18	0.0074	1	0.0063	0.373839	D	0.851351
GO:0045333	cellular respiration	18	0.0076	1	0.0063	0.372345	D	0.828947
GO:0015980	energy derivation by oxidation of organic compounds	18	0.0076	1	0.0063	0.372345	D	0.828947
GO:0006418	tRNA aminoacylation for protein translation	18	0.0076	1	0.0063	0.372345	D	0.828947
GO:0019787	small conjugating protein ligase activity	19	0.0078	1	0.0063	0.368726	D	0.807692
GO:0016829	lyase activity	19	0.0078	1	0.0063	0.368726	D	0.807692
GO:0008237	metallopeptidase activity	19	0.0078	1	0.0063	0.368726	D	0.807692
GO:0043039	tRNA aminoacylation	19	0.008	1	0.0063	0.366739	D	0.7875
GO:0043038	amino acid activation	19	0.008	1	0.0063	0.366739	D	0.7875
GO:0006351	transcription, DNA-dependent	20	0.0085	1	0.0063	0.360206	D	0.741176
GO:0004197	cysteine-type endopeptidase activity	21	0.0087	1	0.0063	0.355803	D	0.724138
GO:0008234	cysteine-type peptidase activity	21	0.0087	1	0.0063	0.355803	D	0.724138
GO:0006397	mRNA processing	21	0.0089	1	0.0063	0.352895	D	0.707865
GO:0032774	RNA biosynthetic process	21	0.0089	1	0.0063	0.352895	D	0.707865
GO:0004722	protein serine/threonine phosphatase activity	23	0.0095	1	0.0063	0.340178	D	0.663158
GO:0003924	GTPase activity	23	0.0095	1	0.0063	0.340178	D	0.663158
GO:0031981	nuclear lumen	25	0.0108	1	0.0068	0.328918	D	0.62963
GO:0012505	endomembrane system	25	0.0108	1	0.0068	0.328918	D	0.62963
GO:0005886	plasma membrane	26	0.0112	1	0.0068	0.320202	D	0.607143	C
GO:0006732	coenzyme metabolic process	25	0.0106	1	0.0063	0.31831	D	0.59434
GO:0044429	mitochondrial part	27	0.0116	1	0.0068	0.311247	D	0.586207
GO:0022626	cytosolic ribosome	27	0.0116	1	0.0068	0.311247	D	0.586207
GO:0042254	ribosome biogenesis	26	0.011	1	0.0063	0.308832	D	0.572727
GO:0022613	ribonucleoprotein complex biogenesis	27	0.0114	1	0.0063	0.299183	D	0.552632
GO:0006399	tRNA metabolic process	27	0.0114	1	0.0063	0.299183	D	0.552632
GO:0006812	cation transport	28	0.0118	1	0.0063	0.289429	D	0.533898
GO:0006470	protein amino acid dephosphorylation	31	0.0131	2	0.0127	0.281211	D	0.969466
GO:0015031	protein transport	34	0.0144	2	0.0127	0.27566	D	0.881944	P
GO:0008104	protein localization	34	0.0144	2	0.0127	0.27566	D	0.881944
GO:0045184	establishment of protein localization	34	0.0144	2	0.0127	0.27566	D	0.881944
GO:0016071	mRNA metabolic process	35	0.0148	2	0.0127	0.2728	D	0.858108
GO:0033036	macromolecule localization	35	0.0148	2	0.0127	0.2728	D	0.858108
GO:0004721	phosphoprotein phosphatase activity	36	0.0148	2	0.0126	0.271692	D	0.851351	F
GO:0044445	cytosolic part	38	0.0164	2	0.0135	0.268497	D	0.823171
GO:0015075	ion transmembrane transporter activity	38	0.0157	2	0.0126	0.264659	D	0.802548
GO:0007049	cell cycle	39	0.0165	2	0.0127	0.257442	D	0.769697	P
GO:0016779	nucleotidyltransferase activity	32	0.0132	1	0.0063	0.256417	D	0.477273
GO:0033279	ribosomal subunit	33	0.0142	1	0.0068	0.255697	D	0.478873
GO:0006811	ion transport	32	0.0135	1	0.0063	0.250406	D	0.466667	P
GO:0070035	purine NTP-dependent helicase activity	44	0.0181	2	0.0126	0.236754	D	0.696133
GO:0008026	ATP-dependent helicase activity	44	0.0181	2	0.0126	0.236754	D	0.696133
GO:0044428	nuclear part	46	0.0198	2	0.0135	0.232949	D	0.681818
GO:0005509	calcium ion binding	35	0.0144	1	0.0063	0.228512	D	0.4375	F
GO:0005525	GTP binding	36	0.0148	1	0.0063	0.219515	D	0.425676
GO:0032561	guanyl ribonucleotide binding	36	0.0148	1	0.0063	0.219515	D	0.425676
GO:0019001	guanyl nucleotide binding	36	0.0148	1	0.0063	0.219515	D	0.425676
GO:0042626	ATPase activity, coupled to transmembrane movement of substances	36	0.0148	1	0.0063	0.219515	D	0.425676
GO:0043492	ATPase activity, coupled to movement of substances	36	0.0148	1	0.0063	0.219515	D	0.425676
GO:0051082	unfolded protein binding	55	0.0227	3	0.0189	0.219443	D	0.832599
GO:0004386	helicase activity	55	0.0227	3	0.0189	0.219443	D	0.832599
GO:0044262	cellular carbohydrate metabolic process	36	0.0152	1	0.0063	0.213154	D	0.414474
GO:0016820	hydrolase activity, acting on acid anhydrides, catalyzing transmembrane movement of substances	37	0.0152	1	0.0063	0.210704	D	0.414474
GO:0016791	phosphatase activity	59	0.0243	3	0.0189	0.207103	D	0.777778
GO:0015405	P-P-bond-hydrolysis-driven transmembrane transporter activity	38	0.0157	1	0.0063	0.202093	D	0.401274
GO:0015399	primary active transmembrane transporter activity	38	0.0157	1	0.0063	0.202093	D	0.401274
GO:0046907	intracellular transport	50	0.0211	2	0.0127	0.197973	D	0.601896
GO:0043632	modification-dependent macromolecule catabolic process	38	0.0161	1	0.0063	0.195678	D	0.391304
GO:0044257	cellular protein catabolic process	38	0.0161	1	0.0063	0.195678	D	0.391304
GO:0051603	proteolysis involved in cellular protein catabolic process	38	0.0161	1	0.0063	0.195678	D	0.391304
GO:0019941	modification-dependent protein catabolic process	38	0.0161	1	0.0063	0.195678	D	0.391304
GO:0006511	ubiquitin-dependent protein catabolic process	38	0.0161	1	0.0063	0.195678	D	0.391304	P
GO:0007165	signal transduction	40	0.0169	1	0.0063	0.179115	D	0.372781	P
GO:0042578	phosphoric ester hydrolase activity	68	0.028	3	0.0189	0.172712	D	0.675
GO:0007154	cell communication	41	0.0173	1	0.0063	0.171195	D	0.364162	P
GO:0006457	protein folding	97	0.041	6	0.038	0.165676	D	0.926829
GO:0070011	peptidase activity, acting on L-amino acid peptides	70	0.0288	3	0.0189	0.164517	D	0.65625
GO:0004175	endopeptidase activity	57	0.0235	2	0.0126	0.164304	D	0.53617
GO:0006091	generation of precursor metabolites and energy	42	0.0178	1	0.0063	0.163523	D	0.353933	P
GO:0034962	cellular biopolymer catabolic process	42	0.0178	1	0.0063	0.163523	D	0.353933
GO:0005975	carbohydrate metabolic process	43	0.0182	1	0.0063	0.156102	D	0.346154	P
GO:0034660	ncRNA metabolic process	43	0.0182	1	0.0063	0.156102	D	0.346154
GO:0051649	establishment of localization in cell	58	0.0245	2	0.0127	0.152748	D	0.518367
GO:0051641	cellular localization	58	0.0245	2	0.0127	0.152748	D	0.518367
GO:0008233	peptidase activity	73	0.0301	3	0.0189	0.152199	D	0.627907	F
GO:0016788	hydrolase activity, acting on ester bonds	119	0.049	7	0.044	0.149863	D	0.897959
GO:0005215	transporter activity	120	0.0494	7	0.044	0.148666	D	0.890688	F
GO:0005634	nucleus	140	0.0602	8	0.0541	0.139899	D	0.898671	C
GO:0044248	cellular catabolic process	88	0.0372	4	0.0253	0.139626	D	0.680108
GO:0016192	vesicle-mediated transport	46	0.0195	1	0.0063	0.135346	D	0.323077
GO:0065007	biological regulation	104	0.044	5	0.0316	0.13069	D	0.718182
GO:0006396	RNA processing	117	0.0495	6	0.038	0.130155	D	0.767677
GO:0050794	regulation of cellular process	77	0.0326	3	0.019	0.130007	D	0.582822
GO:0044085	cellular component biogenesis	48	0.0203	1	0.0063	0.122751	D	0.310345
GO:0016887	ATPase activity	109	0.0449	5	0.0314	0.122735	D	0.699332
GO:0050789	regulation of biological process	80	0.0338	3	0.019	0.118298	D	0.56213	P
GO:0005875	microtubule associated complex	69	0.0297	2	0.0135	0.114207	D	0.454545
GO:0034961	cellular biopolymer biosynthetic process	218	0.0922	14	0.0886	0.113289	D	0.960954
GO:0043284	biopolymer biosynthetic process	219	0.0926	14	0.0886	0.112909	D	0.956803
GO:0009059	macromolecule biosynthetic process	240	0.1015	16	0.1013	0.108319	D	0.99803
GO:0003774	motor activity	69	0.0284	2	0.0126	0.105896	D	0.443662	F
GO:0005515	protein binding	130	0.0536	6	0.0377	0.105539	D	0.703358	F
GO:0031090	organelle membrane	54	0.0232	1	0.0068	0.103289	D	0.293103
GO:0042623	ATPase activity, coupled	86	0.0354	3	0.0189	0.102458	D	0.533898
GO:0044444	cytoplasmic part	362	0.1558	23	0.1554	0.0931801	D	0.997433
GO:0016070	RNA metabolic process	190	0.0803	10	0.0633	0.0931424	D	0.788294
GO:0006139	nucleobase, nucleoside, nucleotide and nucleic acid metabolic process	368	0.1556	24	0.1519	0.0903391	D	0.976221	P
GO:0006508	proteolysis	89	0.0376	3	0.019	0.0867958	D	0.505319
GO:0003723	RNA binding	124	0.0511	5	0.0314	0.0840704	D	0.614481	F
GO:0005737	cytoplasm	419	0.1803	25	0.1689	0.0838803	D	0.936772	C
GO:0030163	protein catabolic process	90	0.0381	3	0.019	0.083674	D	0.498688
GO:0016020	membrane	353	0.1519	20	0.1351	0.0824067	D	0.889401
GO:0044267	cellular protein metabolic process	540	0.2283	36	0.2278	0.0781218	D	0.99781
GO:0009056	catabolic process	141	0.0596	6	0.038	0.0753013	D	0.637584	P
GO:0019538	protein metabolic process	596	0.252	39	0.2468	0.0750735	D	0.979365	P
GO:0043285	biopolymer catabolic process	94	0.0397	3	0.019	0.0719793	D	0.478589
GO:0005840	ribosome	99	0.0426	3	0.0203	0.0709879	D	0.476526	C
GO:0030529	ribonucleoprotein complex	118	0.0508	4	0.027	0.067513	D	0.531496
GO:0043170	macromolecule metabolic process	882	0.3729	58	0.3671	0.0671876	D	0.984446
GO:0005856	cytoskeleton	101	0.0435	3	0.0203	0.0659115	D	0.466667	C
GO:0006810	transport	209	0.0884	10	0.0633	0.0643756	D	0.716063	P
GO:0003735	structural constituent of ribosome	99	0.0408	3	0.0189	0.0639139	D	0.463235
GO:0051234	establishment of localization	210	0.0888	10	0.0633	0.0629543	D	0.712838
GO:0043226	organelle	561	0.2414	32	0.2162	0.0618964	D	0.895609	C
GO:0043229	intracellular organelle	561	0.2414	32	0.2162	0.0618964	D	0.895609
GO:0015630	microtubule cytoskeleton	85	0.0366	2	0.0135	0.0593343	D	0.368852
GO:0006412	translation	150	0.0634	6	0.038	0.0580306	D	0.599369	P
GO:0010467	gene expression	307	0.1298	16	0.1013	0.056147	D	0.780431
GO:0005488	binding	825	0.3399	50	0.3145	0.0547932	D	0.925272	F
GO:0009987	cellular process	1293	0.5467	82	0.519	0.0505359	D	0.949332
GO:0044265	cellular macromolecule catabolic process	65	0.0275	1	0.0063	0.0502117	D	0.229091
GO:0044430	cytoskeletal part	90	0.0387	2	0.0135	0.0474986	D	0.348837
GO:0051179	localization	223	0.0943	10	0.0633	0.0459841	D	0.671262
GO:0017111	nucleoside-triphosphatase activity	212	0.0874	9	0.0566	0.0447817	D	0.647597
GO:0016462	pyrophosphatase activity	217	0.0894	9	0.0566	0.0390436	D	0.63311
GO:0016818	hydrolase activity, acting on acid anhydrides, in phosphorus-containing anhydrides	217	0.0894	9	0.0566	0.0390436	D	0.63311
GO:0016817	hydrolase activity, acting on acid anhydrides	218	0.0898	9	0.0566	0.0379608	D	0.63029
GO:0005198	structural molecule activity	117	0.0482	3	0.0189	0.030271	D	0.392116	F
GO:0005623	cell	998	0.4294	56	0.3784	0.0297835	D	0.88123	C
GO:0044464	cell part	998	0.4294	56	0.3784	0.0297835	D	0.88123
GO:0009057	macromolecule catabolic process	117	0.0495	3	0.019	0.0272551	D	0.383838
GO:0005622	intracellular	710	0.3055	37	0.25	0.023696	D	0.818331	C
GO:0043234	protein complex	242	0.1041	9	0.0608	0.0224085	D	0.584054	C
GO:0044424	intracellular part	700	0.3012	36	0.2432	0.0211703	D	0.807437
GO:0016787	hydrolase activity	434	0.1788	20	0.1258	0.0166171	D	0.703579	F
GO:0044446	intracellular organelle part	240	0.1033	8	0.0541	0.0128511	D	0.523717
GO:0043232	intracellular non-membrane-bounded organelle	222	0.0955	7	0.0473	0.0122767	D	0.495288
GO:0043228	non-membrane-bounded organelle	222	0.0955	7	0.0473	0.0122767	D	0.495288
GO:0044422	organelle part	248	0.1067	8	0.0541	0.0096051	D	0.507029
GO:0032991	macromolecular complex	360	0.1549	13	0.0878	0.0052631	D	0.566817
